# Supplementary material for: Self-detachable protecting group function of CO2 in the electrochemical reduction of aryl azides
Source: Royal Society of Chemistry journal article supplement (doi:10.1039/d3qo01913f), 2023-12-29

## Supporting Information

### Self-detachable protecting group function of CO<sub>2</sub> in the electrochemical reduction of aryl azides

Yuhang Fan,<sup>a</sup> Zhanshuo Zhang,<sup>a</sup> and Yulei Zhao\*<sup>a</sup>

<sup>a</sup> Key Laboratory of Life-Organic Analysis of Shandong Province, Key Laboratory of Green Natural Products and Pharmaceutical Intermediates in Universities of Shandong Province, Key Laboratory of Catalytic Conversion and Clean Energy in Universities of Shandong Province, School of Chemistry and Chemical Engineering, Qufu Normal University, P. R. China.

Corresponding Author: Yulei Zhao

E-mail: [ylzhao@qfnu.edu.cn](mailto:ylzhao@qfnu.edu.cn)

| <b>Contents:</b>                           | <b>Page</b> |
|--------------------------------------------|-------------|
| General Information                        | S3          |
| CV experiments                             | S4          |
| Radical trapping experiments               | S5          |
| X-ray crystal structure of <b>3b</b>       | S6-S7       |
| Synthesis and characterization of <b>2</b> | S8-S19      |
| Synthesis and characterization of <b>3</b> | S20-S24     |
| Scale-up reaction                          | S25-S26     |
| References                                 | S27-S29     |
| NMR spectra of compounds                   | S30-S66     |

## General Information

All glassware was oven dried at 100 °C for hours and cooled down under vacuum. Anhydrous DMF and MeCN was prepared by distillation from CaH<sub>2</sub>. Unless otherwise noted, materials were obtained from commercial suppliers and used without further purification. The instrument for electrolysis is dual display potentiostat (DJS-292C) (made in China), the Mg (1 × 1 × 0.05 cm<sup>3</sup>), Pt (1 × 1 × 0.02 cm<sup>3</sup>), Zn (1 × 1 × 0.05 cm<sup>3</sup>), Al (1 × 1 × 0.05 cm<sup>3</sup>), were purchased from Xuzhou Xinke Instrument and Meter Co. LTD. The thin layer chromatography (TLC) employed glass 0.25 mm silica gel plates. Purification of reaction products was carried out by flash chromatography on silica gel (300~400 mesh). <sup>1</sup>H NMR spectra were recorded at 500 MHz, <sup>13</sup>C NMR spectra were recorded at 125 MHz, and in CDCl<sub>3</sub> or DMSO-*d*<sub>6</sub> (containing 0.03% TMS) solutions with Bruker Advance III spectrometers. <sup>1</sup>H NMR spectra were recorded with Me<sub>4</sub>Si (δ = 0.00), CDCl<sub>3</sub> (δ = 7.26) or DMSO-*d*<sub>6</sub> (δ = 2.50) as the internal reference and <sup>13</sup>C NMR spectra were recorded with CDCl<sub>3</sub> (δ = 77.16) or DMSO-*d*<sub>6</sub> (δ = 39.52) as the internal reference. High-resolution mass spectra were obtained using a Bruker Maxis Impact mass spectrometer with a TOF (for ESI) analyzer.

The substrates **1a-z** are known compounds and are synthesized based on previous reports.<sup>1</sup> The spectroscopic data are in agreement with that previously reported.

**1aa** were purchased from Energy Chemical Co., Ltd.

## CV experiments:

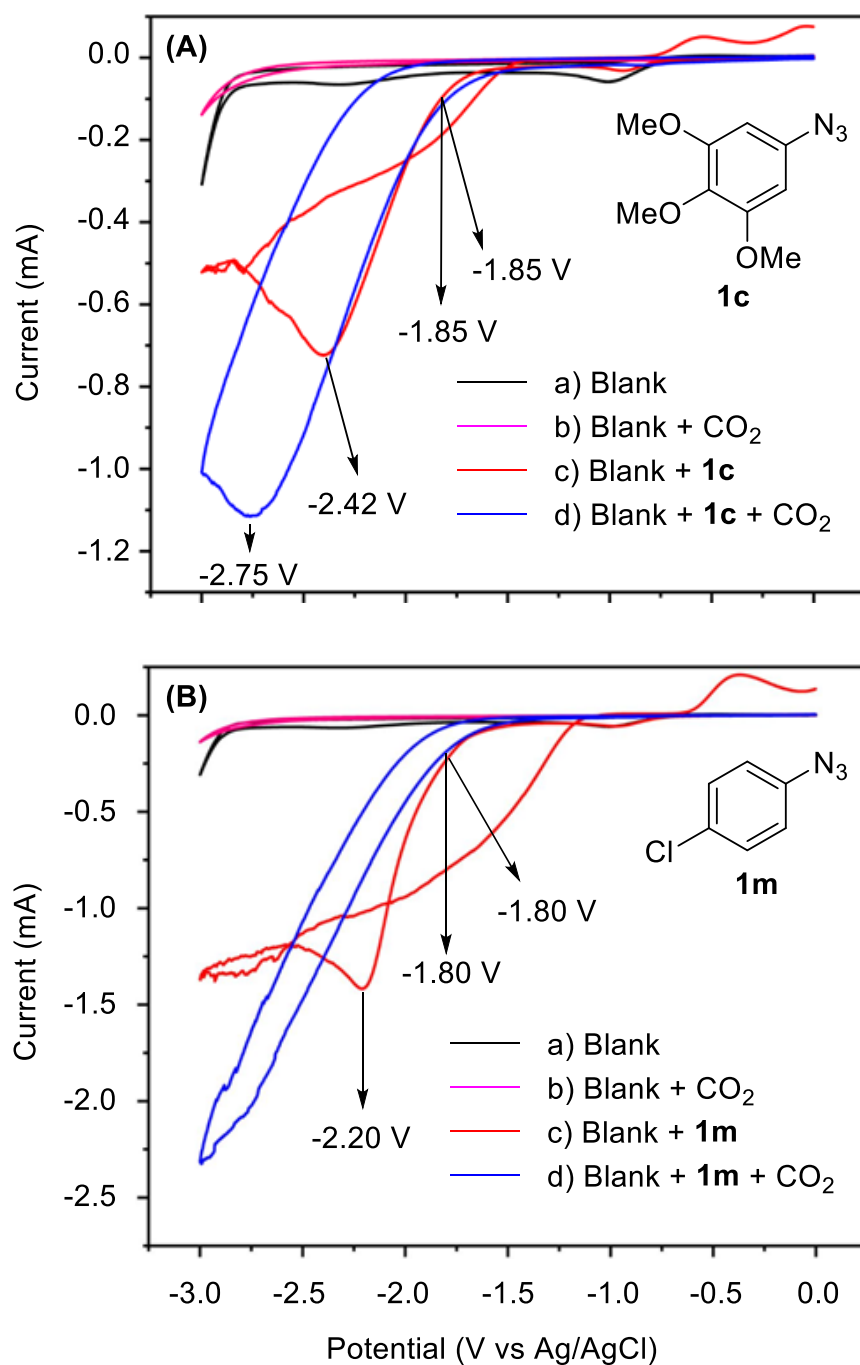

**Figure S1.** Cyclic voltammograms at grass carbon as work electrode, Pt plate ( $1 \times 1 \text{ cm}^2$ ) as counter electrode and Ag/AgCl (KCl) as reference electrode in 0.1 M  $\text{tBu}_4\text{NBF}_4$ , DMF (5 mL), scan rate: 100 mV/s. (a) back-ground, 0.1  $\text{tBu}_4\text{NBF}_4$ ; (b) with  $\text{CO}_2$  saturated; (c) **1c** or **1m** (0.7 mmol); (d) **1c** or **1m** (0.7 mmol) +  $\text{CO}_2$  saturated.

## Radical trapping experiments

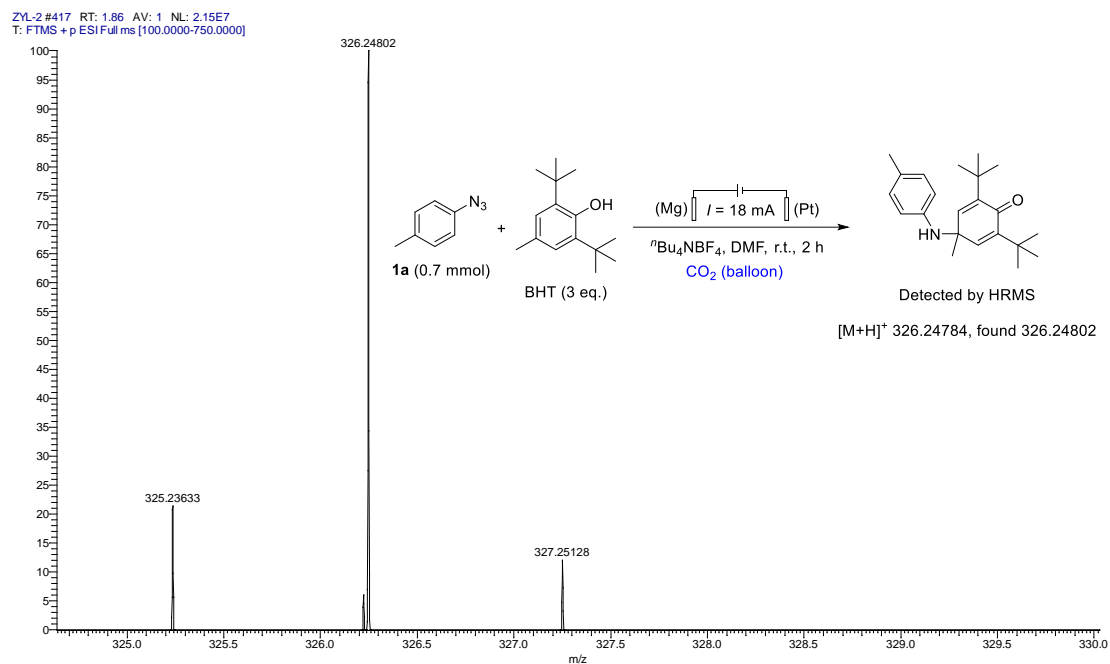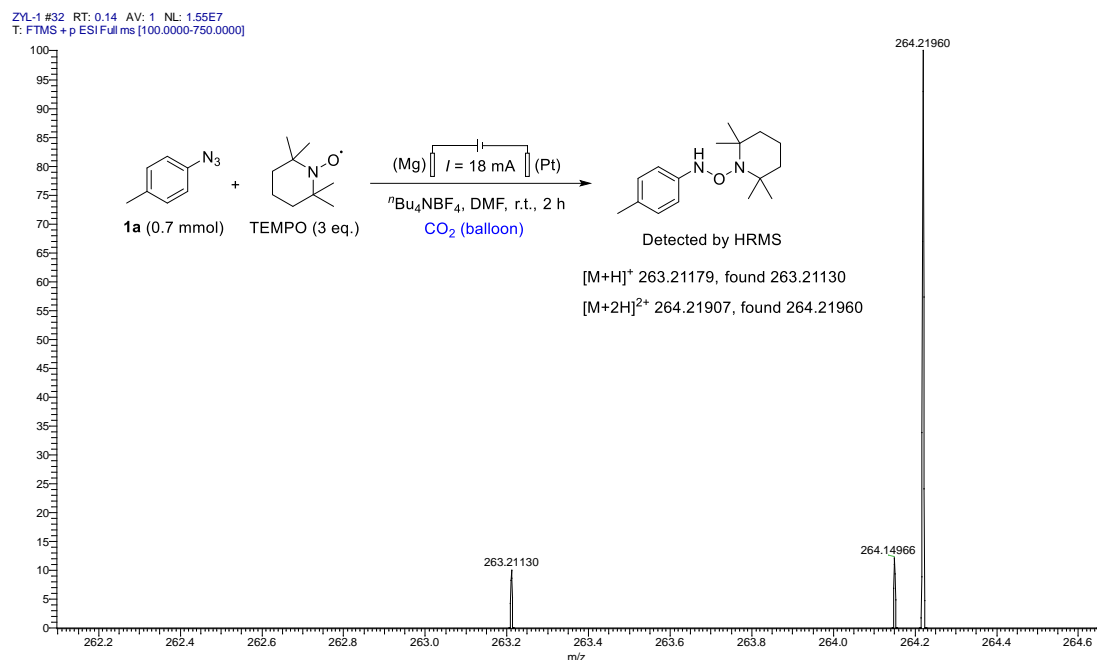

### X-ray crystal structure of **3b**

The displacement ellipsoids are drawn at the 50% probability level. Single crystals suitable for X-ray analysis were obtained by slow evaporation of the mixed solution of CH<sub>2</sub>Cl<sub>2</sub>/petroleum ether (1/3, v/v). Supplementary crystallographic data was deposited at the Cambridge Crystallographic Data Centre (CCDC) under the number CCDC 2305738 (**3b**) and can be obtained free of charge from via [www.ccdc.cam.ac.uk/data\\_request.cif](http://www.ccdc.cam.ac.uk/data_request.cif).

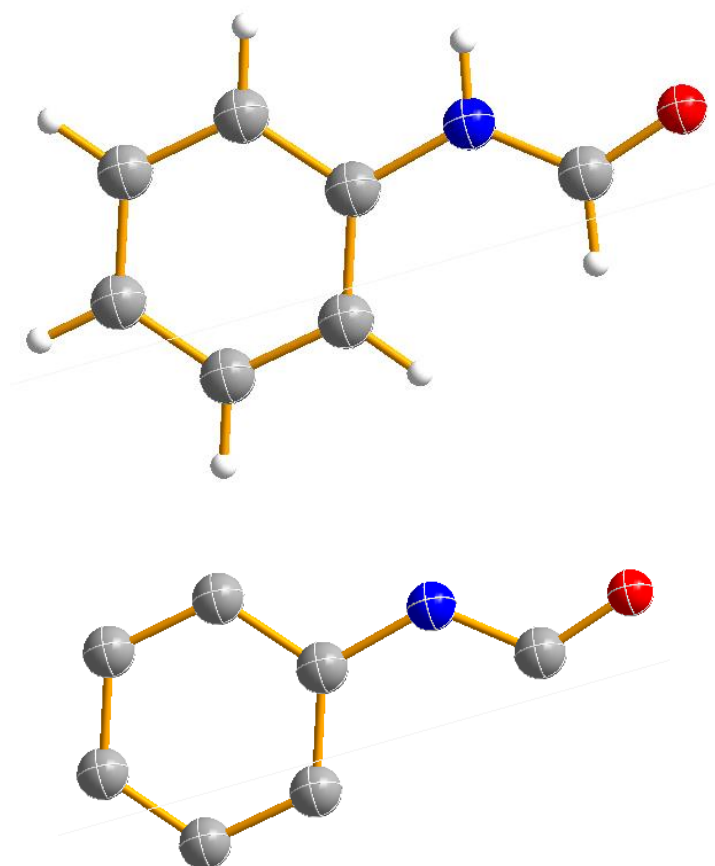

**Figure S2.** X-ray ORTEP illustration of *N*-phenylformamide (**3b**) (50% probability ellipsoids)

**Table S4.** Crystal data and structure refinement for **3b**.

|                                   |                                                               |                  |
|-----------------------------------|---------------------------------------------------------------|------------------|
| Identification code               | lmh1229                                                       |                  |
| Empirical formula                 | C <sub>14</sub> H <sub>14</sub> N <sub>2</sub> O <sub>2</sub> |                  |
| Formula weight                    | 242.27                                                        |                  |
| Temperature                       | 298 K                                                         |                  |
| Wavelength                        | 0.71073 Å                                                     |                  |
| Crystal system                    | monoclinic                                                    |                  |
| Space group                       | I 1 2/a 1                                                     |                  |
| Unit cell dimensions              | a = 14.764(3) Å                                               | α = 90 °         |
|                                   | b = 6.1667(13) Å                                              | β = 95.238(16) ° |
|                                   | c = 28.554(4) Å                                               | γ = 90 °         |
| Volume                            | 2588.8(8) Å <sup>3</sup>                                      |                  |
| Z                                 | 8                                                             |                  |
| Density (calculated)              | 1.243 mg/m <sup>3</sup>                                       |                  |
| Absorption coefficient            | 0.085 mm <sup>-1</sup>                                        |                  |
| F(000)                            | 1024                                                          |                  |
| Theta range for data collection   | 2.8400 to 20.9880 °                                           |                  |
| Index ranges                      | -19<=h<=19, -8<=k<=5, -29<=l<=38                              |                  |
| Reflections collected             | 9347                                                          |                  |
| Independent reflections           | 3041 [R(int) = 0.0498]                                        |                  |
| Completeness to theta = 25.242 °  | 84.4 %                                                        |                  |
| Max. and min. transmission        | 0.844 and 1.000                                               |                  |
| Refinement method                 | Full-matrix least-squares on F <sup>2</sup>                   |                  |
| Data / restraints / parameters    | 3041 / 0 / 163                                                |                  |
| Goodness-of-fit on F <sup>2</sup> | 0.980                                                         |                  |
| Final R indices [I>2sigma(I)]     | R1 = 0.0540, wR2 = 0.1184                                     |                  |
| R indices (all data)              | R1 = 0.1394, wR2 = 0.1482                                     |                  |
| Largest diff. peak and hole       | 0.109 and -0.173 e.Å <sup>-3</sup>                            |                  |

## Synthesis and characterization of 2

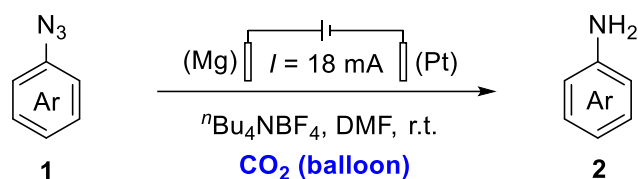

In an oven-dried undivided three-necked bottle (25 mL) equipped with a stir bar, **1** (0.7 mmol), and  $^n\text{Bu}_4\text{NBF}_4$  (164.6 mg, 0.5 mmol) were added. The bottle was equipped with magnesium plate ( $1 \times 1 \times 0.05 \text{ cm}^3$ ) anode and platinum plate ( $1 \times 1 \times 0.02 \text{ cm}^3$ ) cathode. The vessel was evacuated and refilled with  $\text{CO}_2$  five times. Then, DMF (5 mL, pre-deoxygenated by purging with high-purity  $\text{CO}_2$  gas up to 5 mins) was added. The mixture was stirred (600 rpm) and electrolyzed at a constant current of 18 mA. After the reaction finished as monitored with TLC, the reaction mixture was diluted with water and extracted with ethyl acetate ( $15 \text{ mL} \times 3$ ). The organic layers were combined, washed with water, dried over  $\text{Na}_2\text{SO}_4$ , and concentrated in vacuum. The pure product was obtained by flash column chromatography on silica gel (petroleum ether: ethyl acetate = 1:1-20:1).

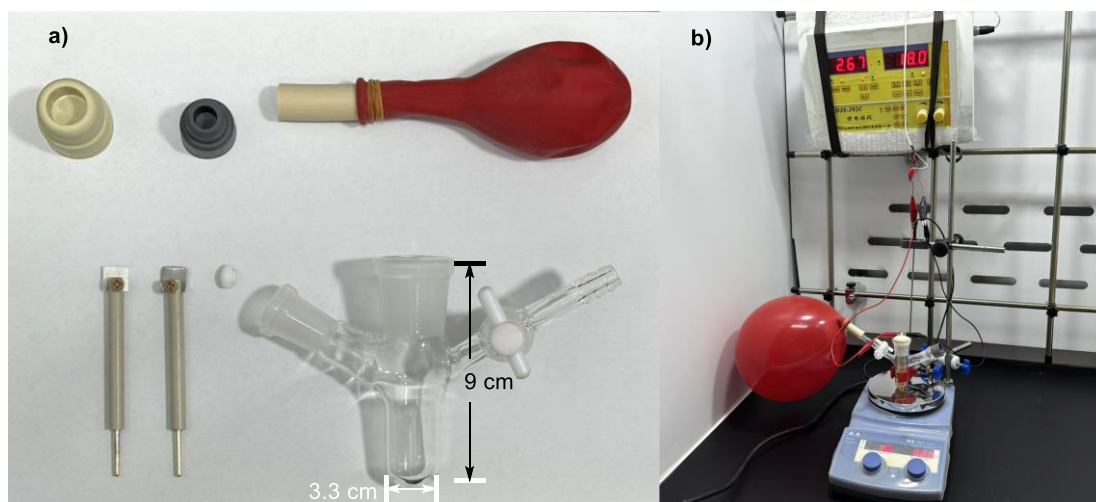

**Figure S3.** Set-up of Experiments (the photographs come from our lab). a) Experimental equipment. b) Reaction process diagram.



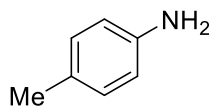

**2a**

### **P-toluidine (2a)<sup>2</sup>**

Compound **2a** was prepared in 90% yield (68 mg) according to the general procedure.  $R_f = 0.2$  (petroleum ether/ethyl acetate = 20/1); White solid; mp 41-42 °C; <sup>1</sup>H NMR (500 MHz, CDCl<sub>3</sub>): δ 6.99 (d,  $J = 7.9$  Hz, 2H), 6.63 (d,  $J = 8.2$  Hz, 2H), 3.47 (s, 2H), 2.27 (s, 3H); <sup>13</sup>C NMR (125 MHz, CDCl<sub>3</sub>): δ 143.9, 129.9, 127.9, 115.4, 20.6. Analytical data for **2a** was consistent with that previously reported.<sup>2</sup>

#### **Note:**

(a) If the sacrificial Mg anode was replaced with sacrificial reagent (e.g., DIPEA, 3 equiv, 2.1 mmol, 366 uL) and Pt anode (1 × 1 × 0.02 cm<sup>3</sup>), **2a** can also be obtained, but the yield is reduced to 9% (7 mg).

(b) If the mode of CO<sub>2</sub> supply was changed to bubbling, the bubbling rate will affect the ratio of products **2a/3a**. Using DMF that is not pre-deoxygenated: when the bubbling rate of CO<sub>2</sub> is relatively fast, no formylation product **3a** is observed; when the rate of CO<sub>2</sub> bubbling is very slow (one bubble per ten seconds; inside diameter of needle: 1 mm), formylation product **3a** is observed (**2a/3a** = 6/1; **2a**, 66%, 50mg; **3a**, 11%, 10 mg).

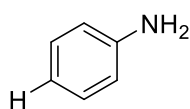

**2b**

### **Aniline (2b)<sup>2</sup>**

Compound **2b** was prepared in 85% yield (55 mg) according to the general procedure.  $R_f = 0.2$  (petroleum ether/ethyl acetate = 20/1); Colorless oil; <sup>1</sup>H NMR (500 MHz,

CDCl<sub>3</sub>):  $\delta$  7.19-7.16 (m, 2H), 6.79-6.76 (m, 1H), 6.71-6.69 (m, 2H), 3.46 (s, 2H); <sup>13</sup>C NMR (125 MHz, CDCl<sub>3</sub>):  $\delta$  146.5, 129.4, 118.6, 115.2. Analytical data for **2b** was consistent with that previously reported.<sup>2</sup>

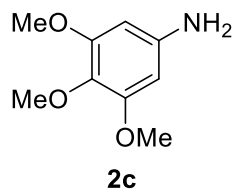

### 3,4,5-Trimethoxyaniline (**2c**)<sup>3</sup>

Compound **2c** was prepared in 79% yield (101 mg) according to the general procedure.  $R_f$  = 0.2 (petroleum ether/ethyl acetate = 1/1); Yellow solid; mp 110-111 °C; <sup>1</sup>H NMR (500 MHz, CDCl<sub>3</sub>):  $\delta$  5.93 (s, 2H), 3.80 (s, 6H), 3.75 (s, 3H); <sup>13</sup>C NMR (125 MHz, CDCl<sub>3</sub>):  $\delta$  154.0, 143.0, 130.9, 92.8, 61.1, 56.0. Analytical data for **2c** was consistent with that previously reported.<sup>3</sup>

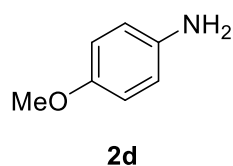

### 4-Methoxyaniline (**2d**)<sup>2</sup>

Compound **2d** was prepared in 91% yield (78 mg) according to the general procedure.  $R_f$  = 0.2 (petroleum ether/ethyl acetate = 5/1); Yellow solid; mp 56-57 °C; <sup>1</sup>H NMR (500 MHz, CDCl<sub>3</sub>):  $\delta$  6.76-6.74 (m, 2H), 6.66-6.64 (m, 2H), 3.75 (s, 3H), 3.28 (s, 2H); <sup>13</sup>C NMR (125 MHz, CDCl<sub>3</sub>):  $\delta$  152.9, 140.0, 116.5, 114.9, 55.8. Analytical data for **2d** was consistent with that previously reported.<sup>2</sup>

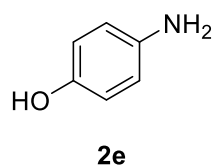

### 4-Aminophenol (**2e**)<sup>4</sup>

Compound **2e** was prepared in 62% yield (47 mg) according to the general procedure.  $R_f = 0.2$  (petroleum ether/ethyl acetate = 4/1); White solid; mp 187-188 °C;  $^1\text{H NMR}$  (500 MHz,  $\text{DMSO-}d_6$ ):  $\delta$  8.31(s, 1H), 6.48-6.46 (m, 2H), 6.42-6.40 (m, 2H), 4.35 (s, 2H);  $^{13}\text{C NMR}$  (125 MHz,  $\text{DMSO-}d_6$ ):  $\delta$  148.2, 140.7, 115.6, 115.3. Analytical data for **2e** was consistent with that previously reported.<sup>4</sup>

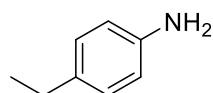

**2f**

#### 4-Ethylaniline (**2f**)<sup>5</sup>

Compound **2f** was prepared in 81% yield (69 mg) according to the general procedure.  $R_f = 0.2$  (petroleum ether/ethyl acetate = 15/1); Yellow oil;  $^1\text{H NMR}$  (500 MHz,  $\text{CDCl}_3$ ):  $\delta$  7.04-7.03 (m, 2H), 6.66 (d,  $J = 8.2$  Hz, 2H), 3.47 (s, 2H), 2.59 (q,  $J = 7.5$  Hz, 2H), 1.25-1.22 (m, 3H);  $^{13}\text{C NMR}$  (125 MHz,  $\text{CDCl}_3$ ):  $\delta$  144.1, 134.5, 128.7, 115.4, 28.1, 16.0. Analytical data for **2f** was consistent with that previously reported.<sup>5</sup>

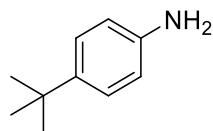

**2g**

#### 4-(Tert-butyl)aniline (**2g**)<sup>6</sup>

Compound **2g** was prepared in 92% yield (96 mg) according to the general procedure.  $R_f = 0.2$  (petroleum ether/ethyl acetate = 15/1); Colorless oil;  $^1\text{H NMR}$  (500 MHz,  $\text{CDCl}_3$ ):  $\delta$  7.21 (d,  $J = 8.3$  Hz, 2H), 6.68-6.65(m, 2H), 3.40 (s, br, 2H), 1.30 (s, 9H);  $^{13}\text{C NMR}$  (125 MHz,  $\text{CDCl}_3$ ):  $\delta$  143.9, 141.6, 126.2, 115.1, 34.0, 31.7. Analytical data for **2g** was consistent with that previously reported.<sup>6</sup>

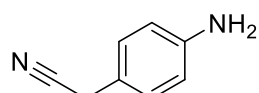

**2h**

### 2-(4-Aminophenyl)acetonitrile (**2h**)<sup>7</sup>

Compound **2h** was prepared in 68% yield (63 mg) according to the general procedure.  $R_f = 0.2$  (petroleum ether/ethyl acetate = 15/1); Yellow solid; mp 45-46 °C; <sup>1</sup>H NMR (500 MHz, CDCl<sub>3</sub>): δ 7.09 (d,  $J = 8.0$  Hz, 2H), 6.67 (d,  $J = 8.1$  Hz, 2H), 3.71 (s, 2H), 3.62 (s, 2H); <sup>13</sup>C NMR (125 MHz, DMSO-*d*<sub>6</sub>): δ 148.1, 128.7, 119.9, 117.4, 114.1, 21.5. Analytical data for **2h** was consistent with that previously reported.<sup>7</sup>

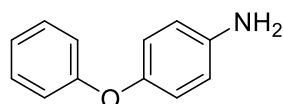

**2i**

### 4-Phenoxyaniline (**2i**)<sup>7</sup>

Compound **2i** was prepared in 85% yield (110 mg) according to the general procedure.  $R_f = 0.2$  (petroleum ether/ethyl acetate = 3/1); Brown solid; mp 82-73 °C; <sup>1</sup>H NMR (500 MHz, CDCl<sub>3</sub>): δ 7.30-7.27 (m, 2H), 7.03-7.00 (m, 1H), 6.95-6.93 (m, 2H), 6.90-6.86 (m, 2H), 6.70-6.67 (m, 2H), 3.58 (s, 2H); <sup>13</sup>C NMR (125 MHz, CDCl<sub>3</sub>): δ 159.0, 148.7, 142.8, 129.6, 122.2, 121.3, 117.4, 116.4. Analytical data for **2i** was consistent with that previously reported.<sup>7</sup>

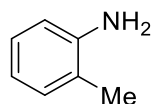

**2j**

### O-toluidine (**2j**)<sup>4</sup>

Compound **2j** was prepared in 76% yield (57 mg) according to the general procedure.  $R_f = 0.2$  (petroleum ether/ethyl acetate = 15/1); Yellow oil; <sup>1</sup>H NMR (500 MHz, CDCl<sub>3</sub>): δ 7.10-7.06 (m, 2H), 6.77-6.74 (m, 1H), 6.71 (d,  $J = 7.7$  Hz, 1H), 3.56 (s, 2H), 2.20 (s, 3H); <sup>13</sup>C NMR (125 MHz, CDCl<sub>3</sub>): δ 144.6, 130.5, 127.0, 122.4, 118.7, 115.0, 17.4. Analytical data for **2j** was consistent with that previously reported.<sup>4</sup>

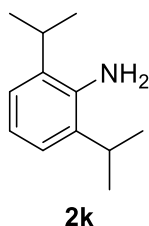

### 2,6-Diisopropylaniline (**2k**)<sup>8</sup>

Compound **2k** was prepared in 84% yield (104 mg) according to the general procedure.  $R_f = 0.2$  (petroleum ether/ethyl acetate = 15/1); Colorless oil;  $^1\text{H NMR}$  (500 MHz,  $\text{CDCl}_3$ ):  $\delta$  7.10 (d,  $J = 7.7$  Hz, 2H), 6.87-6.84 (m, 1H), 3.77 (s, br, 2H), 3.02-2.94 (m, 2H), 1.33 (d,  $J = 6.9$  Hz, 12H);  $^{13}\text{C NMR}$  (125 MHz,  $\text{CDCl}_3$ ):  $\delta$  140.4, 132.5, 122.9, 118.6, 28.1, 22.6. Analytical data for **2k** was consistent with that previously reported.<sup>8</sup>

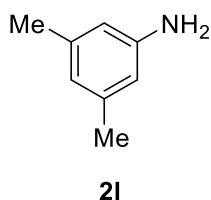

### 3,5-Dimethylaniline (**2l**)<sup>9</sup>

Compound **2l** was prepared in 77% yield (65 mg) according to the general procedure.  $R_f = 0.2$  (petroleum ether/ethyl acetate = 15/1); Yellow oil;  $^1\text{H NMR}$  (500 MHz,  $\text{CDCl}_3$ ):  $\delta$  6.44 (s, 1H), 6.35 (s, 2H), 3.35 (s, br, 2H), 2.24 (s, 6H);  $^{13}\text{C NMR}$  (125 MHz,  $\text{CDCl}_3$ ):  $\delta$  146.3, 139.1, 120.7, 113.3, 21.4. Analytical data for **2l** was consistent with that previously reported.<sup>9</sup>

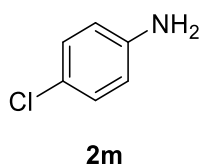

### 4-Chloroaniline (**2m**)<sup>7</sup>

Compound **2m** was prepared in 85% yield (76 mg) according to the general procedure.  $R_f = 0.2$  (petroleum ether/ethyl acetate = 10/1); White solid; mp 67-68 °C;  $^1\text{H NMR}$

(500 MHz, CDCl<sub>3</sub>):  $\delta$  7.11-7.09 (m, 2H), 6.60 (d,  $J$  = 8.7 Hz, 2H), 3.59 (s, 2H); <sup>13</sup>C NMR (125 MHz, CDCl<sub>3</sub>):  $\delta$  145.1, 129.2, 123.2, 116.3. Analytical data for **2m** was consistent with that previously reported.<sup>7</sup>

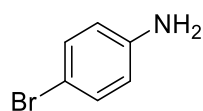

**2n**

#### 4-Bromoaniline (**2n**)<sup>2</sup>

Compound **2n** was prepared in 61% yield (73 mg) according to the general procedure.  $R_f$  = 0.2 (petroleum ether/ethyl acetate = 15/1); Yellow solid; mp 56-57 °C; <sup>1</sup>H NMR (500 MHz, CDCl<sub>3</sub>):  $\delta$  7.25 (s, 2H), 6.58 (s, 2H), 3.65 (s, 2H); <sup>13</sup>C NMR (125 MHz, CDCl<sub>3</sub>):  $\delta$  145.5, 132.1, 116.8, 110.3. Analytical data for **2n** was consistent with that previously reported.<sup>2</sup>

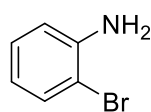

**2o**

#### 2-Bromoaniline (**2o**)<sup>7</sup>

Compound **2o** was prepared in 63% yield (76 mg) according to the general procedure.  $R_f$  = 0.2 (petroleum ether/ethyl acetate = 15/1); White solid; mp 32-33 °C; <sup>1</sup>H NMR (500 MHz, CDCl<sub>3</sub>):  $\delta$  7.41 (d,  $J$  = 8.0 Hz, 1H), 7.12-7.09 (m, 1H), 6.77 (d,  $J$  = 8.0 Hz, 1H), 6.64-6.61 (m, 1H), 4.08 (s, 2H); <sup>13</sup>C NMR (125 MHz, CDCl<sub>3</sub>):  $\delta$  144.2, 132.7, 128.4, 119.5, 115.9, 109.4. Analytical data for **2o** was consistent with that previously reported.<sup>[7]</sup>

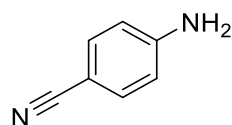

**2p**

#### 4-Aminobenzonitrile (**2p**)<sup>10</sup>

Compound **2p** was prepared in 81% yield (67 mg) according to the general procedure.  $R_f = 0.2$  (petroleum ether/ethyl acetate = 5/1); Yellow solid; mp 83-84 °C; <sup>1</sup>H NMR (500 MHz, CDCl<sub>3</sub>): δ 7.41-7.37 (m, 2H), 6.65-6.62 (m, 2H), 4.23 (s, 2H); <sup>13</sup>C NMR (125 MHz, CDCl<sub>3</sub>): δ 150.8, 133.9, 120.4, 114.5, 99.8. Analytical data for **2p** was consistent with that previously reported.<sup>10</sup>

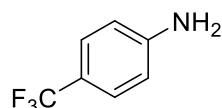

**2q**

#### 4-(Trifluoromethyl)aniline (**2q**)<sup>11</sup>

Compound **2q** was prepared in 88% yield (99 mg) according to the general procedure.  $R_f = 0.2$  (petroleum ether/ethyl acetate = 7/1); Colourless oil; <sup>1</sup>H NMR (500 MHz, CDCl<sub>3</sub>): δ 7.39 (d,  $J = 8.4$  Hz, 2H), 6.69 (d,  $J = 8.4$  Hz, 2H), 3.93 (s, br, 2H); <sup>13</sup>C NMR (125 MHz, CDCl<sub>3</sub>): δ 149.5, 126.8 (q,  $J^3 = 3.8$  Hz), 125.0 (q,  $J^1 = 268.8$  Hz), 120.3 (q,  $J^2 = 31.6$  Hz), 114.3; <sup>19</sup>F NMR (470 MHz, CDCl<sub>3</sub>): δ -61.2. Analytical data for **2q** was consistent with that previously reported.<sup>11</sup>

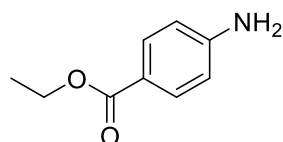

**2r**

#### Ethyl 4-aminobenzoate (**2r**)<sup>4</sup>

Compound **2r** was prepared in 77% yield (89 mg) according to the general procedure.  $R_f = 0.2$  (petroleum ether/ethyl acetate = 5/1); White solid; mp 89-90 °C; <sup>1</sup>H NMR (500 MHz, CDCl<sub>3</sub>): δ 7.85 (d,  $J = 6.6$  Hz, 2H), 6.63 (d,  $J = 6.6$  Hz, 2H), 4.32-4.30 (m, 2H), 4.07 (s, 2H), 1.36 (t,  $J = 3.1$  Hz, 3H); <sup>13</sup>C NMR (125 MHz, CDCl<sub>3</sub>): δ 166.8, 150.9, 131.6, 120.1, 113.9, 60.4, 14.5. Analytical data for **2r** was consistent with that previously reported.<sup>4</sup>

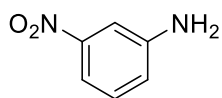

**2s**

### 3-Nitroaniline (**2s**)<sup>12</sup>

Compound **2s** was prepared in 83% yield (80 mg) according to the general procedure.  $R_f = 0.2$  (petroleum ether/ethyl acetate = 4/1); Yellow solid; mp 111-112 °C; <sup>1</sup>H NMR (500 MHz, CDCl<sub>3</sub>): δ 7.58-6.96 (m, 4H), 4.03 (s, 2H); <sup>13</sup>C NMR (125 MHz, CDCl<sub>3</sub>): δ 149.3, 147.6, 130.0, 120.7, 113.2, 109.1. Analytical data for **2s** was consistent with that previously reported.<sup>12</sup>

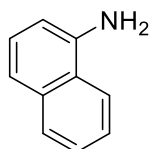

**2t**

### Naphthalen-1-amine (**2t**)<sup>2</sup>

Compound **2t** was prepared in 82% yield (82 mg) according to the general procedure.  $R_f = 0.2$  (petroleum ether/ethyl acetate = 5/1); Yellow solid; mp 47-48 °C; <sup>1</sup>H NMR (500 MHz, CDCl<sub>3</sub>): δ 7.84-7.80 (m, 2H), 7.49-7.45 (m, 2H), 7.34-7.28 (m, 2H), 6.79 (d,  $J = 7.0$  Hz, 1H), 3.83 (s, br, 2H); <sup>13</sup>C NMR (125 MHz, CDCl<sub>3</sub>): δ 142.2, 134.5, 128.7, 126.4, 126.0, 125.0, 123.8, 120.9, 119.1, 109.8. Analytical data for **2t** was consistent with that previously reported.<sup>2</sup>

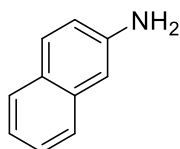

**2u**

### Naphthalen-2-amine (**2u**)<sup>9</sup>

Compound **2u** was prepared in 81% yield (81 mg) according to the general procedure.  $R_f = 0.2$  (petroleum ether/ethyl acetate = 5/1); White solid; mp 111-112 °C; <sup>1</sup>H NMR



(500 MHz, CDCl<sub>3</sub>):  $\delta$  7.75-7.70 (m, 2H), 7.64 (d,  $J$  = 8.3 Hz, 1H), 7.43-7.40 (m, 1H), 7.30-7.27 (m, 1H), 7.03 (d,  $J$  = 1.9 Hz, 1H), 6.99 (dd,  $J$  = 8.6, 2.3 Hz, 1H), 3.85 (s, 2H); <sup>13</sup>C NMR (125 MHz, CDCl<sub>3</sub>):  $\delta$  144.2, 135.0, 129.3, 128.1, 127.8, 126.5, 125.9, 122.6, 118.4, 108.7. Analytical data for **2u** was consistent with that previously reported.<sup>9</sup>

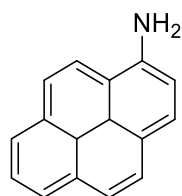

**2v**

### Pyren-1-amine (**2v**)<sup>19</sup>

Compound **2v** was prepared in 67% yield (103 mg) and according to the general procedure.  $R_f$  = 0.2 (petroleum ether/ethyl acetate = 10/1); Green solid; mp 115-116 °C; <sup>1</sup>H NMR (500 MHz, CDCl<sub>3</sub>):  $\delta$  8.07-8.04 (m, 2H), 8.00-7.91 (m, 5H), 7.82 (d,  $J$  = 8.9 Hz, 1H), 7.38 (d,  $J$  = 8.1 Hz, 1H), 4.49 (s, 2H); <sup>13</sup>C NMR (125 MHz, CDCl<sub>3</sub>):  $\delta$  141.0, 132.3, 131.7, 127.7, 126.1, 126.1, 126.1, 125.6, 124.4, 124.2, 123.8, 123.6, 120.2, 116.9, 114.0. Analytical data for **2w** was consistent with that previously reported.<sup>19</sup>

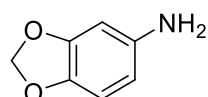

**2w**

### Benzo[d][1,3]dioxol-5-amine (**2w**)<sup>13</sup>

Compound **2w** was prepared in 87% yield (84 mg) according to the general procedure.  $R_f$  = 0.2 (petroleum ether/ethyl acetate = 5/1); Black solid; mp 39-40 °C; <sup>1</sup>H NMR (500 MHz, CDCl<sub>3</sub>):  $\delta$  6.62 (d,  $J$  = 8.2 Hz, 1H), 6.28 (d,  $J$  = 1.5 Hz, 1H), 6.13 (dd,  $J$  = 8.2, 1.4 Hz, 1H), 5.85 (d,  $J$  = 0.7 Hz, 2H), 3.16 (s, br, 2H); <sup>13</sup>C NMR (125 MHz, CDCl<sub>3</sub>):  $\delta$  148.3, 141.5, 140.5, 108.7, 107.0, 100.8, 98.2. Analytical data for **2w** was consistent with that previously reported.<sup>13</sup>

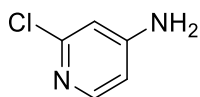

**2x**

### 2-Chloropyridin-4-amine (2x)<sup>7</sup>

Compound **2x** was prepared in 79% yield (71 mg) according to the general procedure.  $R_f = 0.2$  (petroleum ether/ethyl acetate = 2/1); White solid; mp 90-91 °C; <sup>1</sup>H NMR (500 MHz, DMSO-*d*<sub>6</sub>): δ 7.76 (d,  $J = 5.7$  Hz, 1H), 6.47 (d,  $J = 2.0$  Hz, 1H), 6.44 (dd,  $J = 5.7, 2.1$  Hz, 1H), 6.36 (s, 2H); <sup>13</sup>C NMR (125 MHz, DMSO-*d*<sub>6</sub>): δ 156.8, 150.8, 149.1, 108.5, 106.8. Analytical data for **2x** was consistent with that previously reported.<sup>7</sup>

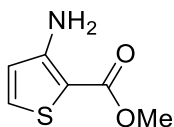

**2y**

### Methyl 3-aminothiophene-2-carboxylate (2y)<sup>14</sup>

Compound **2y** was prepared in 34% yield (37 mg) according to the general procedure.  $R_f = 0.2$  (petroleum ether/ethyl acetate = 10/1); White solid; mp 62-63 °C; <sup>1</sup>H NMR (500 MHz, CDCl<sub>3</sub>): δ 7.26 (d,  $J = 5.2$  Hz, 1H), 6.53 (d,  $J = 5.3$  Hz, 1H), 5.47 (s, 2H), 3.82 (s, 3H); <sup>13</sup>C NMR (125 MHz, CDCl<sub>3</sub>): δ 165.1, 154.1, 131.7, 119.9, 101.3, 51.4. Analytical data for **2y** was consistent with that previously reported.<sup>14</sup>

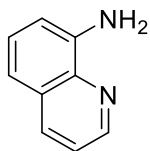

**2z**

### Quinolin-8-amine (2z)<sup>8</sup>

Compound **2z** was prepared in 67% yield (68 mg) according to the general procedure.  $R_f = 0.2$  (petroleum ether/ethyl acetate = 5/1); Yellow solid; mp 60-61 °C; <sup>1</sup>H NMR (500 MHz, CDCl<sub>3</sub>): δ 8.76 (dd,  $J = 4.2, 1.7$  Hz, 1H), 8.06 (dd,  $J = 8.3, 1.6$  Hz, 1H),

7.37-7.32 (m, 2H), 7.15 (dd,  $J = 8.1, 0.9$  Hz, 1H), 6.93 (dd,  $J = 7.5, 1.1$  Hz, 1H), 4.98 (s, br, 2H);  $^{13}\text{C}$  NMR (125 MHz,  $\text{CDCl}_3$ ):  $\delta$  147.5, 144.1, 138.6, 136.1, 129.0, 127.5, 121.4, 116.2, 110.2. Analytical data for **2z** was consistent with that previously reported.<sup>8</sup>

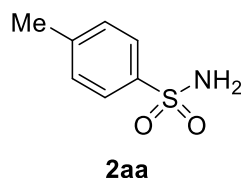

#### 4-Methylbenzenesulfonamide (**2aa**)<sup>12</sup>

Compound **2aa** was prepared in 55% yield (66 mg) according to the general procedure.  $R_f = 0.2$  (petroleum ether/ethyl acetate = 3/1); White solid; mp 134-135 °C;  $^1\text{H}$  NMR (500 MHz,  $\text{DMSO}-d_6$ ):  $\delta$  7.71 (d,  $J = 8.2$  Hz, 2H), 7.36 (d,  $J = 8.0$  Hz, 2H), 7.28 (s, 2H), 2.36 (s, 3H);  $^{13}\text{C}$  NMR (125 MHz,  $\text{DMSO}-d_6$ ):  $\delta$  141.9, 141.5, 129.3, 125.7, 20.9. Analytical data for **2aa** was consistent with that previously reported.<sup>12</sup>

### Synthesis and characterization of 3

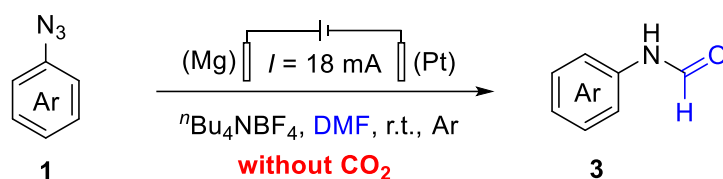

In an oven-dried undivided three-necked bottle (25 mL) equipped with a stir bar, 1 (0.7 mmol), DMF (5 mL),  $^t\text{Bu}_4\text{NBF}_4$  (164.6 mg, 0.5 mmol) were added. The vessel was evacuated and refilled with Ar five times. The bottle was equipped with platinum plate ( $1 \times 1 \times 0.05 \text{ cm}^3$ ) anode and platinum plate ( $1 \times 1 \times 0.02 \text{ cm}^3$ ) cathode, under an argon atmosphere. The mixture was stirred (600 rpm) and electrolyzed at a constant current of 18 mA. After the reaction finished as monitored with TLC, the reaction mixture was diluted with water and extracted with ethyl acetate ( $15 \text{ mL} \times 3$ ). The organic layers were combined, washed with water, dried over  $\text{Na}_2\text{SO}_4$ , and concentrated in vacuum. The pure product was obtained by flash column chromatography on silica gel (petroleum ether: ethyl acetate = 1:1-3:1).

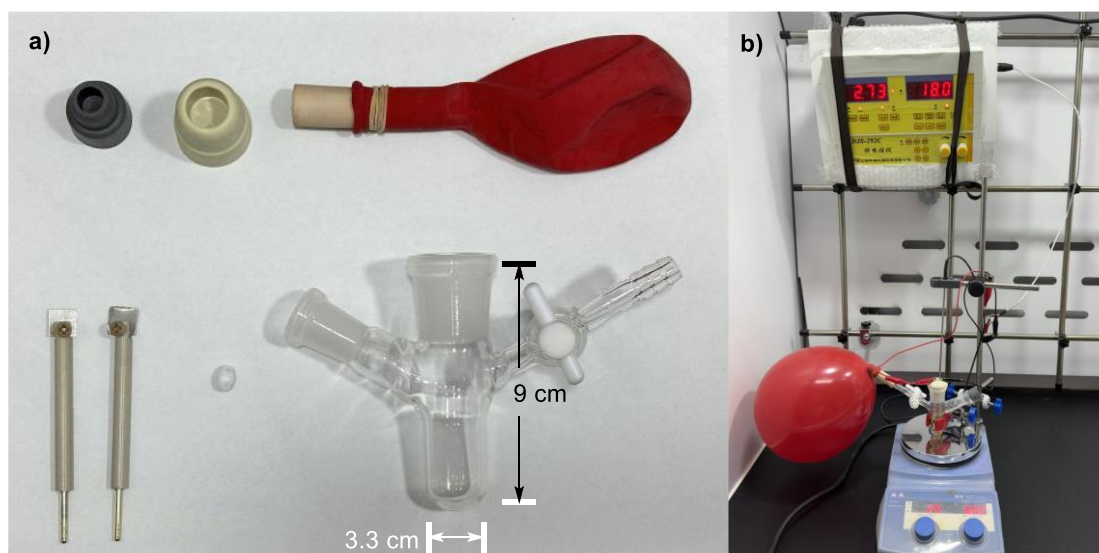

**Figure S4.** Set-up of Experiments (the photographs come from our lab). a) Experimental equipment. b) Reaction process diagram.

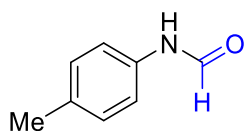

**3a**

### N-p-tolylformamide (3a)<sup>15</sup>

Compound **3a** was prepared in 67% yield (63 mg) according to the general procedure.  $R_f = 0.2$  (petroleum ether/ethyl acetate = 3/1); Brown solid; mp 51-52 °C; <sup>1</sup>H NMR (500 MHz, CDCl<sub>3</sub>): δ 8.62 (d,  $J = 11.5$  Hz, 0.52H), 8.34 (d,  $J = 1.5$  Hz, 0.46H), 8.04 (s, 0.41H), 7.42 (d,  $J = 8.4$  Hz, 1H), 7.34 (s, 0.46H), 7.16-7.12 (m, 2H), 6.98 (d,  $J = 8.3$  Hz, 1H), 2.33 (s, 1.59H), 2.32 (s, 1.40H); <sup>13</sup>C NMR (125 MHz, CDCl<sub>3</sub>): δ 163.0, 159.2, 135.3, 134.6, 134.5, 134.2, 130.3, 129.7, 120.2, 119.3, 21.0, 20.9. Analytical data for **3a** was consistent with that previously reported.<sup>15</sup>

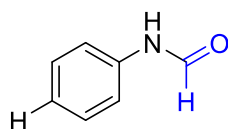

**3b**

### N-phenylformamide (3b)<sup>15</sup>

Compound **3b** was prepared in 56% yield (47 mg) according to the general procedure.  $R_f = 0.2$  (petroleum ether/ethyl acetate = 3/1); Brown solid; mp 46-47 °C; <sup>1</sup>H NMR (500 MHz, CDCl<sub>3</sub>): δ 8.70 (d,  $J = 11.3$  Hz, 0.57H), 8.57 (s, 0.47H), 8.36 (s, 0.47H), 7.70 (s, 0.41H), 7.55 (d,  $J = 7.7$  Hz, 1H), 7.37-7.31 (m, 2H), 7.20-7.09 (m, 2H); <sup>13</sup>C NMR (125 MHz, CDCl<sub>3</sub>): δ 162.9, 159.3, 137.1, 136.9, 129.8, 129.2, 125.4, 124.9, 120.1, 118.9. Analytical data for **3b** was consistent with that previously reported.<sup>15</sup>

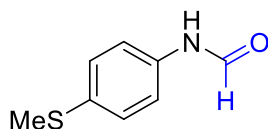

**3c**

### N-(4-(methylthio)phenyl)formamide (3c)<sup>16</sup>

Compound **3c** was prepared in 47% yield (55 mg) according to the general procedure.  $R_f = 0.2$  (petroleum ether/ethyl acetate = 3/1); Yellow solid; mp 69-70 °C;  $^1\text{H NMR}$  (500 MHz,  $\text{CDCl}_3$ ):  $\delta$  8.56 (d,  $J = 11.4$  Hz, 0.51H), 8.36 (d,  $J = 8.8$  Hz, 0.45H), 8.27 (d,  $J = 1.5$  Hz, 0.62H), 7.55 (s, 0.56H), 7.40 (d,  $J = 8.8$  Hz, 0.45H), 7.19-7.14 (m, 2H), 6.96 (d,  $J = 8.6$  Hz, 1H), 2.49 (s, 1.39H), 2.48 (s, 1.58H);  $^{13}\text{C NMR}$  (125 MHz,  $\text{CDCl}_3$ ):  $\delta$  162.8, 159.2, 135.4, 134.5, 134.4, 134.2, 128.5, 127.9, 120.7, 119.7, 16.6, 16.6. Analytical data for **3c** was consistent with that previously reported.<sup>16</sup>

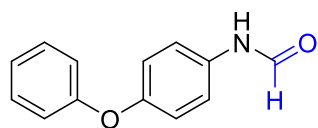

**3d**

#### **N-(4-phenoxyphenyl)formamide (3d)**<sup>16</sup>

Compound **3d** was prepared in 55% yield (82 mg) according to the general procedure.  $R_f = 0.2$  (petroleum ether/ethyl acetate = 3/1); Brown solid; mp 52-53 °C;  $^1\text{H NMR}$  (500 MHz,  $\text{CDCl}_3$ ):  $\delta$  8.59 (d,  $J = 11.5$  Hz, 0.45H), 8.35 (d,  $J = 1.6$  Hz, 0.54H), 8.17 (d,  $J = 8.5$  Hz, 0.41H), 7.52-7.49 (m, 1H), 7.47 (s, br, 0.45H), 7.36-7.31 (m, 2H), 7.13-7.06 (m, 2H), 7.02-6.98 (m, 4H);  $^{13}\text{C NMR}$  (125 MHz,  $\text{CDCl}_3$ ):  $\delta$  163.0, 159.1, 157.5, 157.2, 155.1, 154.1, 132.4, 132.0, 130.0, 129.9, 123.6, 123.4, 121.9, 121.3, 120.2, 119.7, 118.8, 118.7. Analytical data for **3d** was consistent with that previously reported.<sup>16</sup>

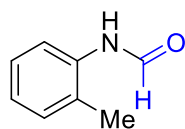

**3e**

#### **N-o-tolylformamide (3e)**<sup>17</sup>

Compound **3e** was prepared in 48% yield (45 mg) according to the general procedure.  $R_f = 0.2$  (petroleum ether/ethyl acetate = 3/1); Brown solid; mp 56-57 °C  $^1\text{H NMR}$  (500 MHz,  $\text{CDCl}_3$ ):  $\delta$  8.45 (d,  $J = 11.3$  Hz, 0.62H), 8.35 (s, 0.38H), 8.07 (s, 0.59H), 7.79 (d,

$J = 7.9$  Hz, 0.38H), 7.23-7.00 (m, 4H), 2.23 (s, 1.86H), 2.20 (s, 1.14H);  $^{13}\text{C}$  NMR (125 MHz,  $\text{CDCl}_3$ ):  $\delta$  163.6, 159.4, 135.2, 134.7, 131.3, 130.7, 129.9, 128.8, 127.2, 126.9, 126.2, 125.6, 123.2, 120.9, 17.8, 17.8. Analytical data for **3e** was consistent with that previously reported.<sup>17</sup>

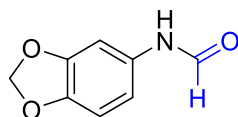

**3f**

### N-(benzo[d][1,3]dioxol-5-yl)formamide (**3f**)<sup>15</sup>

Compound **3f** was prepared in 57% yield (66 mg) according to the general procedure.  $R_f = 0.2$  (petroleum ether/ethyl acetate = 3/1); Yellow solid; mp 80-81 °C;  $^1\text{H}$  NMR (500 MHz,  $\text{CDCl}_3$ ):  $\delta$  8.49 (d,  $J = 11.4$  Hz, 0.44H), 8.29 (d,  $J = 1.6$  Hz, 0.47H), 8.21 (s, 0.42H), 7.52 (s, 0.46H), 7.22 (d,  $J = 2.1$  Hz, 0.46H), 6.84 (dd,  $J = 8.3, 2.1$  Hz, 0.51H), 6.77-6.72 (m, 1H), 6.62 (d,  $J = 2.2$  Hz, 0.43H), 6.54 (dd,  $J = 8.2, 2.2$  Hz, 0.48H), 5.97 (s, 0.87H), 5.94 (s, 1.04H);  $^{13}\text{C}$  NMR (125 MHz,  $\text{CDCl}_3$ ):  $\delta$  163.2, 159.1, 148.7, 148.0, 145.8, 144.8, 131.1, 130.9, 113.3, 108.8, 108.2, 103.0, 102.2, 101.8, 101.5. Analytical data for **3f** was consistent with that previously reported.<sup>15</sup>

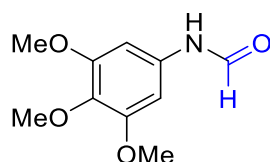

**3g**

### N-(3,4,5-trimethoxyphenyl)formamide (**3g**)<sup>18</sup>

Compound **3g** was prepared in 60% yield (89 mg) according to the general procedure.  $R_f = 0.2$  (petroleum ether/ethyl acetate = 1/1); Yellow oil;  $^1\text{H}$  NMR (500 MHz,  $\text{CDCl}_3$ ):  $\delta$  8.60 (d,  $J = 11.4$  Hz, 0.41H), 8.32 (d,  $J = 1.5$  Hz, 0.59H), 8.10 (d,  $J = 10.6$  Hz, 0.39H), 7.55 (s, 0.62H), 6.84 (s, 1H), 6.30 (s, 1H), 3.84-3.80 (m, 9H);  $^{13}\text{C}$  NMR (125 MHz,  $\text{CDCl}_3$ ):  $\delta$  162.8, 159.2, 154.1, 153.4, 135.9, 135.0, 133.3, 132.8, 97.8, 97.4, 61.1, 61.1, 56.3, 56.2. Analytical data for **3g** was consistent with that previously reported.<sup>18</sup>

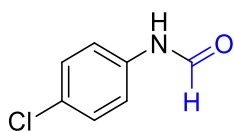

**3h**

### **N-(4-chlorophenyl)formamide (3h)**<sup>16</sup>

Compound **3h** was prepared in 63% yield (69 mg) according to the general procedure.  $R_f = 0.2$  (petroleum ether/ethyl acetate = 3/1); Yellow solid; mp 103-104 °C; <sup>1</sup>H NMR (500 MHz, CDCl<sub>3</sub>): δ 8.65 (d,  $J = 11.3$  Hz, 0.45H), 8.49 (s, 0.33H), 8.36 (s, 0.56H), 7.60 (s, 0.41H), 7.49 (d,  $J = 8.8$  Hz, 1H), 7.33-7.28 (m, 2H), 7.04 (d,  $J = 8.7$  Hz, 1H); <sup>13</sup>C NMR (125 MHz, CDCl<sub>3</sub>): δ 162.7, 159.2, 135.6, 135.4, 130.9, 130.0, 129.2, 121.4, 120.2. Analytical data for **3h** was consistent with that previously reported.<sup>16</sup>

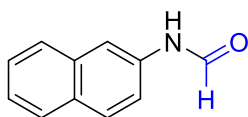

**3i**

### **N-(naphthalen-2-yl)formamide (3i)**<sup>18</sup>

Compound **3i** was prepared in 45% yield (54 mg) according to the general procedure.  $R_f = 0.2$  (petroleum ether/ethyl acetate = 3/1); Yellow solid; mp 134-135 °C; <sup>1</sup>H NMR (500 MHz, CDCl<sub>3</sub>): δ 8.85 (d,  $J = 11.3$  Hz, 0.48H), 8.50 (s, br, 0.42H), 8.45 (s, 0.53H), 8.23 (s, 0.5H), 7.85-7.77 (m, 3H), 7.63 (s, 0.54H), 7.52-7.40 (m, 3H), 7.25-7.24 (m, 0.48H); <sup>13</sup>C NMR (125 MHz, CDCl<sub>3</sub>): δ 134.4, 134.3, 133.9, 133.9, 131.2, 131.0, 130.1, 129.1, 127.9, 127.8, 127.7, 127.4, 127.3, 126.8, 125.6, 125.4, 119.7, 118.9, 117.2, 115.3. Analytical data for **3i** was consistent with that previously reported.<sup>18</sup>



### Scale-up Reaction:

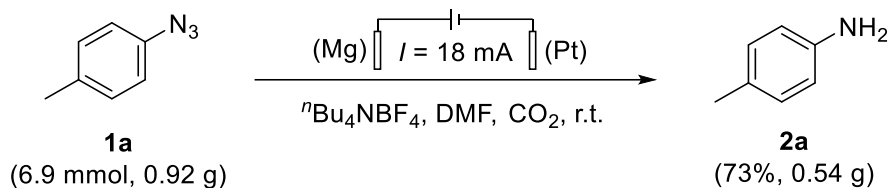

In an oven-dried undivided three-necked bottle (50 mL) equipped with a stir bar, **1a** (0.92 g, 6.9 mmol), DMF (30 mL) and  ${}^t\text{Bu}_4\text{NBF}_4$  (0.99 g, 3.0 mmol) were added. The bottle was equipped with magnesium plate ( $1 \times 1 \times 0.05 \text{ cm}^3$ ) anode and platinum plate ( $1 \times 1 \times 0.02 \text{ cm}^3$ ) cathode, and continuously bubbling of  $\text{CO}_2$  into the solution (direct connection to the  $\text{CO}_2$  gas cylinder). Then, the mixture was stirred (600 rpm) and electrolyzed at a constant current of 18 mA under room temperature for about 12 h. After the reaction finished as monitored with TLC, the reaction mixture was diluted with water and extracted with ethyl acetate (50 mL $\times$ 3). The organic layers were combined, washed with water, dried over  $\text{Na}_2\text{SO}_4$ , and concentrated in vacuum. The pure product was obtained by flash column chromatography on silica gel (petroleum ether: ethyl acetate = 20:1) to afford the **2a** (0.54 g, 73%).

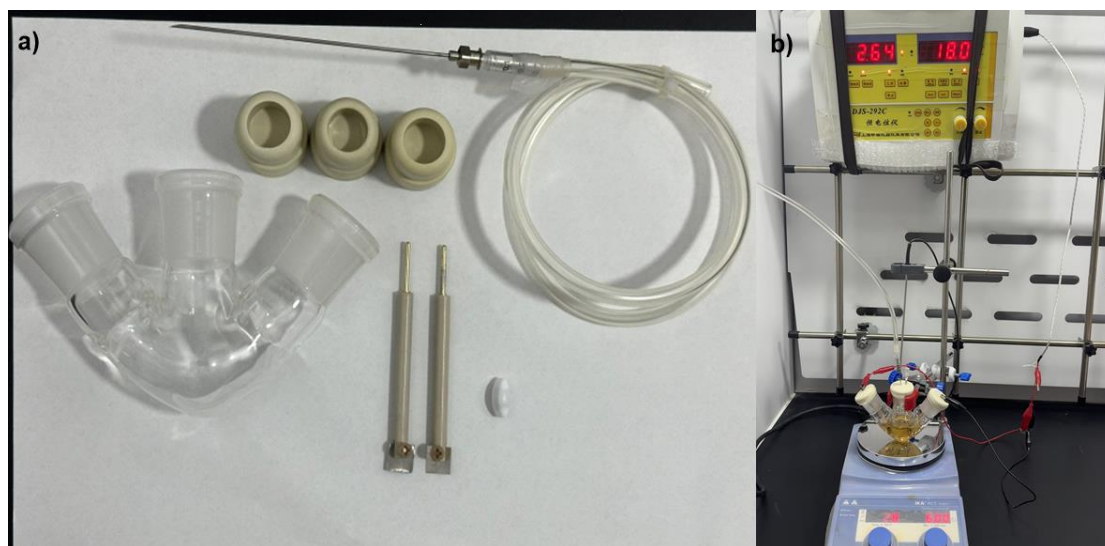

**Figure S5.** Set-up of Experiments (the photographs come from our lab). a) Experimental equipment. b) Reaction process diagram.

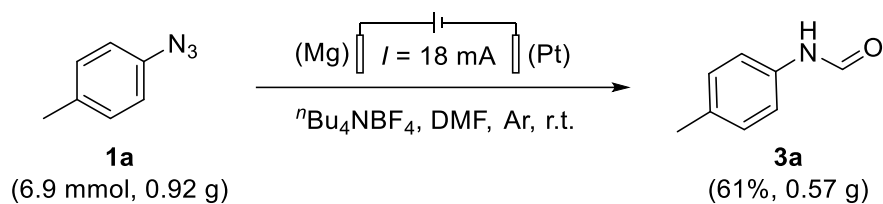

In an oven-dried undivided three-necked bottle (50 mL) equipped with a stir bar, **1a** (0.92 g, 6.9 mmol), DMF (30 mL) and  $\text{tBu}_4\text{NBF}_4$  (0.99 mg, 3.0 mmol) were added. The vessel was evacuated and refilled with argon five times. The bottle was equipped with magnesium plate ( $1 \times 1 \times 0.05 \text{ cm}^3$ ) anode and platinum plate ( $1 \times 1 \times 0.02 \text{ cm}^3$ ) cathode, under an argon atmosphere. The mixture was stirred (600 rpm) and electrolyzed at a constant current of 18 mA under room temperature for about 7 h. After the reaction finished as monitored with TLC, the reaction mixture was diluted with water and extracted with ethyl acetate ( $50 \text{ mL} \times 3$ ). The organic layers were combined, washed with water, dried over  $\text{Na}_2\text{SO}_4$ , and concentrated in vacuum. The pure product was obtained by flash column chromatography on silica gel (petroleum ether: ethyl acetate = 3:1) to afford the **3a** (0.57 g, 61%).

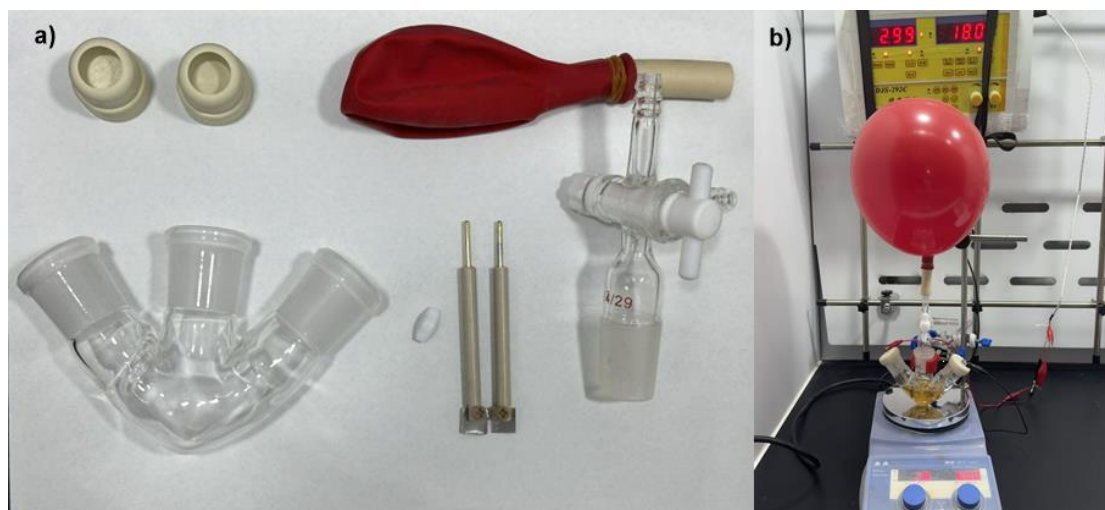

**Figure S6.** Set-up of Experiments (the photographs come from our lab). a) Experimental equipment. b) Reaction process diagram.

## References:

- [1] (a) W. Zhu and D. Ma, Synthesis of aryl azides and vinyl azides via proline-promoted CuI-catalyzed coupling reactions, *Chem. Commun.*, 2004, 888-889; (b) A. Clerc, V. B é n é t e a u, P. Pale and S. Chassaing, Chan-Lam-type Azidation and One-Pot CuAAC under CuI-Zeolite Catalysis, *ChemCatChem*, 2020, **12**, 2060–2065; (c) L. Peng, Y. Zhao, Y. Okuda, L. Le, Z. Tang, S.-F. Yin, R. Qiu and A. Orita, Process-Divergent Syntheses of 4- and 5-Sulfur-Functionalized 1,2,3-Triazoles via Copper-Catalyzed Azide–Alkyne Cycloadditions of 1-Phosphinyl-2-sulfanylethynes, *J. Org. Chem.*, 2023, **88**, 3089–3108; (d) A. R. Hajipour and F. Mohammadsaleh, Synthesis of aryl azides from aryl halides promoted by Cu<sub>2</sub>O/tetraethylammonium proline, *Tetrahedron Lett.*, 2014, **55**, 6799–6802; (e) F. Zhang and J. E. Moses, Benzyne Click Chemistry with in Situ Generated Aromatic Azides, *Org. Lett.*, 2009, **11**, 1587–1590.
- [2] K. Murugesan, T. Senthamarai, M. Sohail, A. S. Alshammari, M.-M. Pohl, M. Beller and R. V. Jagadeesh, Cobalt-based nanoparticles prepared from MOF–carbon templates as efficient hydrogenation catalysts, *Chem. Sci.*, 2018, **9**, 8553-8560.
- [3] A. Mori, T. Mizusaki, M. Kawase, T. Maegawa, Y. Monguchi, S. Takao, Y. Takagi and H. Sajiki, Novel Palladium-on-Carbon/Diphenyl Sulfide Complex for Chemoselective Hydrogenation: Preparation, Characterization, and Application, *Adv. Synth. Catal.*, 2008, **350**, 406-410.
- [4] Z. Zhao, H. Yang, Y. Li and X. Guo, Cobalt-modified molybdenum carbide as an efficient catalyst for chemoselective reduction of aromatic nitro compounds, *Green Chem.*, 2014, **16**, 1274-1281.
- [5] T. Ichikawa, M. Netsu, M. Mizuno, T. Mizusaki, Y. Takagi, Y. Sawama, Y. Monguchi and H. Sajiki, Development of a Unique Heterogeneous Palladium Catalyst for the Suzuki–Miyaura Reaction using (Hetero)aryl Chlorides and Chemoselective Hydrogenation, *Adv. Synth. Catal.*, 2017, **359**, 2269-2279.
- [6] X. H. Huang and S. L. Buchwald, New Ammonia Equivalents for the Pd-Catalyzed Amination of Aryl Halides, *Org. Lett.*, 2001, **3**, 3417-3419.
- [7] G. Song, D.-Z. Nong, Q. Li, Y. Yan, G. Li, J. Fan, W. Zhang, R. Cao, C. Wang, J. Xiao and D. Xue, Photochemical Synthesis of Anilines via Ni-Catalyzed Coupling of Aryl Halides with Ammonium Salts, *ACS Catal.*, 2022, **12**, 15590-15599.

- [8] J. Feng, S. Handa, F. Gallou and B. H. Lipshutz, Safe and Selective Nitro Group Reductions Catalyzed by Sustainable and Recyclable Fe/ppm Pd Nanoparticles in Water at Room Temperature, *Angew. Chem., Int. Ed.*, 2016, **55**, 8979-8983.
- [9] Z. Qiu, L. Lv, J. Li, C.-C. Li and C.-J. Li, Direct conversion of phenols into primary anilines with hydrazine catalyzed by palladium, *Chem. Sci.*, 2019, **10**, 4775-4781.
- [10] V. Udumula, S. H. Nazari, S. R. Burt, M. N. Alfindie and D. J. Michaelis, Chemo- and Site-Selective Alkyl and Aryl Azide Reductions with Heterogeneous Nanoparticle Catalysts, *ACS Catal.*, 2016, **6**, 4423-4427.
- [11] J. Kim and S. Chang, Ammonium salts as an inexpensive and convenient nitrogen source in the Cu-catalyzed amination of aryl halides at room temperature, *Chem. Commun.*, 2008, 3052-3054.
- [12] X. Zeng, W. Huang, Y. Qiu and S. Jiang, An efficient copper-catalyzed synthesis of anilines by employing aqueous ammonia, *Org. Biomol. Chem.*, 2011, **9**, 8224-8227.
- [13] V. Zubar, A. Dewanji and M. Rueping, Chemoselective Hydrogenation of Nitroarenes Using an Air-Stable Base-Metal Catalyst, *Org. Lett.*, 2021, **23**, 2742-2747.
- [14] B. Zelenay, M. Besora, Z. Monasterio, D. Ventura-Espinosa, A. J. P. White, F. Maseras and S. D éz-Gonz áez, Copper-mediated reduction of azides under seemingly oxidising conditions: catalytic and computational studies, *Catal. Sci. Technol.*, 2018, **8**, 5763-5773.
- [15] X. Jiang, Z. Huang, M. Makha, C.-X. Du, D. Zhao, F. Wang and Y. Li, Tetracoordinate borates as catalysts for reductive formylation of amines with carbon dioxide, *Green Chem.*, 2020, **22**, 5317-5324.
- [16] V. Pace, K. de la Vega-Hern ández, E. Urban and T. Langer, Chemoselective Schwartz Reagent Mediated Reduction of Isocyanates to Formamides, *Org. Lett.*, 2016, **18**, 2750-2753.
- [17] H. Liu, Z. Nie, J. Shao, W. Chen and Y. Yu, Mild and facile synthesis of formamide: reduction and functionalization of CO<sub>2</sub> using NaBH(OAc)<sub>3</sub> under atmospheric pressure, *Green Chem.*, 2019, **21**, 3552-3555.

[18] J. Yin, J. Zhang, C. Cai, G.-J. Deng and H. Gong, Catalyst-Free Transamidation of Aromatic Amines with Formamide Derivatives and Tertiary Amides with Aliphatic Amines, *Org. Lett.*, 2019, **21**, 387–392.

[19] V. Chugh, B. Chatterjee, W.-C. Chang, H. H. Cramer, C. Hindemith, H. Randel, T. Weyhermüller, C. Farès and C. Werlé An Adaptive Rhodium Catalyst to Control the Hydrogenation Network of Nitroarenes, *Angew. Chem., Int. Ed.*, 2022, **61**, e202205515.

## NMR spectra of compounds 2

20230531-zy1-87-1

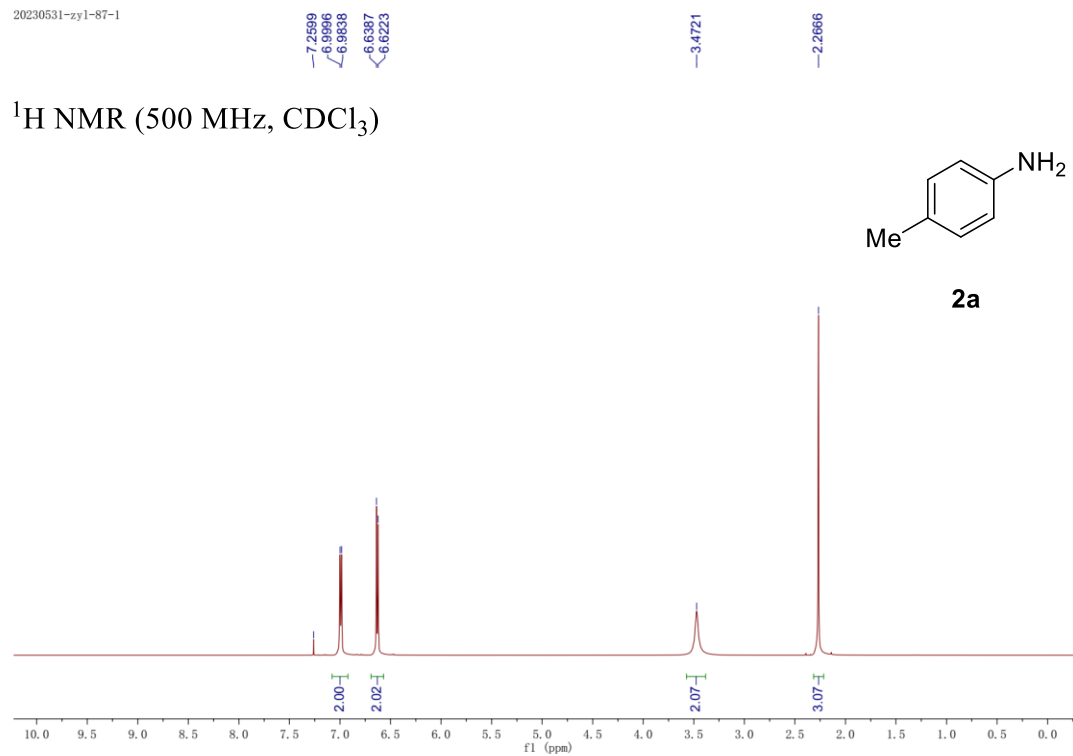

20230531-zy1-87-1

<sup>13</sup>C NMR (125 MHz, CDCl<sub>3</sub>)

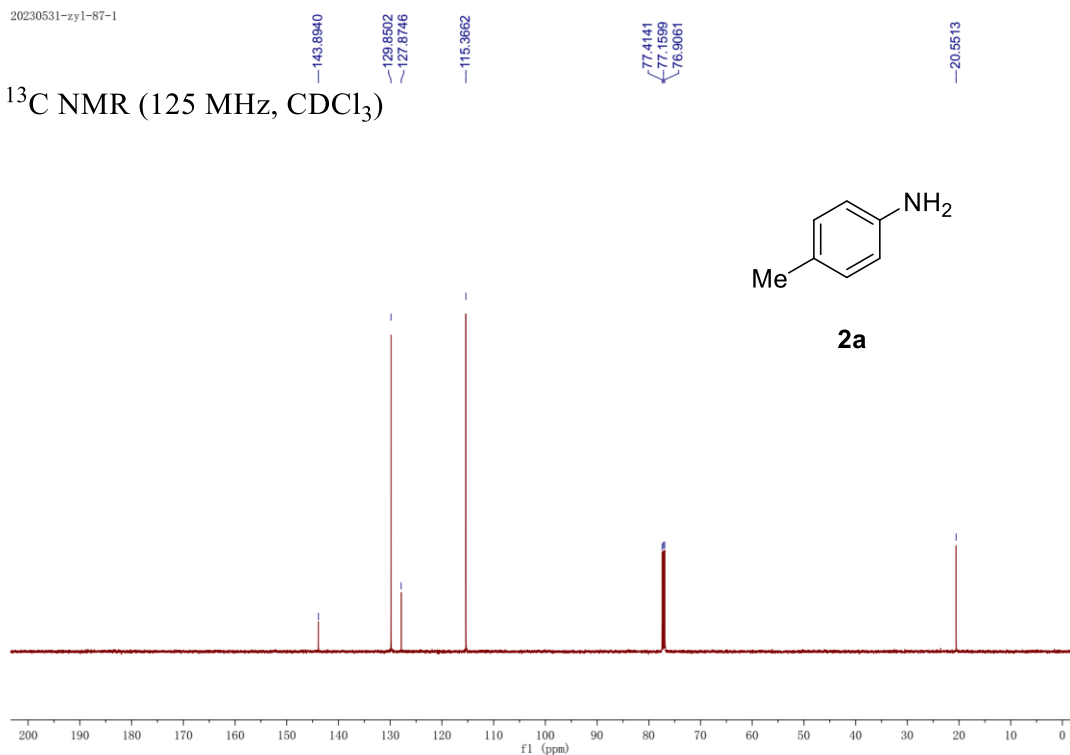

20230912-zy1-90-1038-h

$^1\text{H}$  NMR (500 MHz,  $\text{CDCl}_3$ )

20230912-zy1-90-1038-h

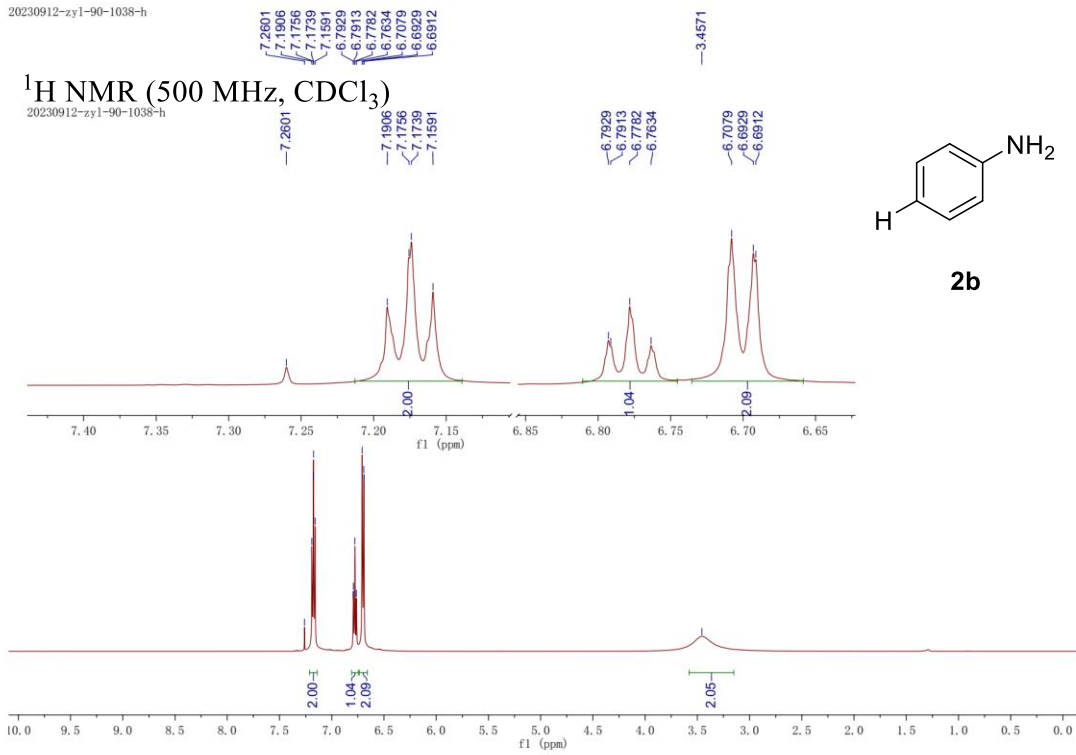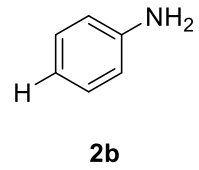

20230912-zy1-90-1038-c

$^{13}\text{C}$  NMR (125 MHz,  $\text{CDCl}_3$ )

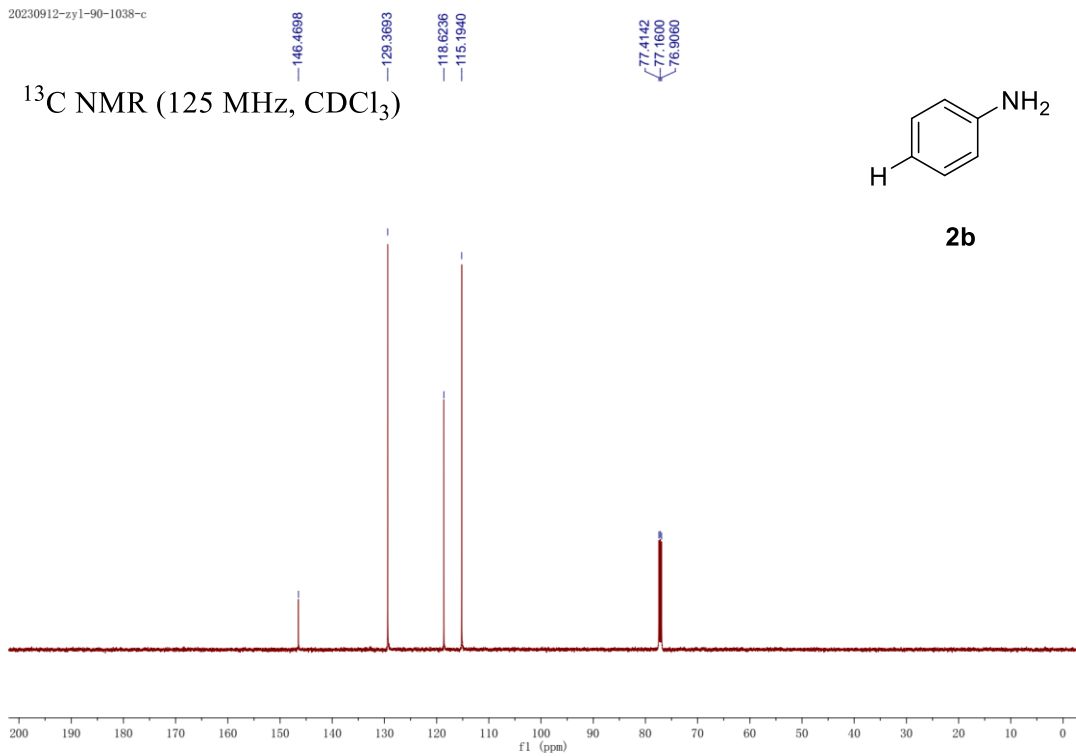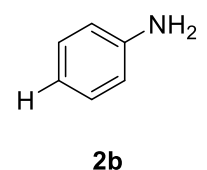

20230911-zy1-90-184

7.2602

5.9254

3.7997  
3.7545

$^1\text{H}$  NMR (500 MHz,  $\text{CDCl}_3$ )

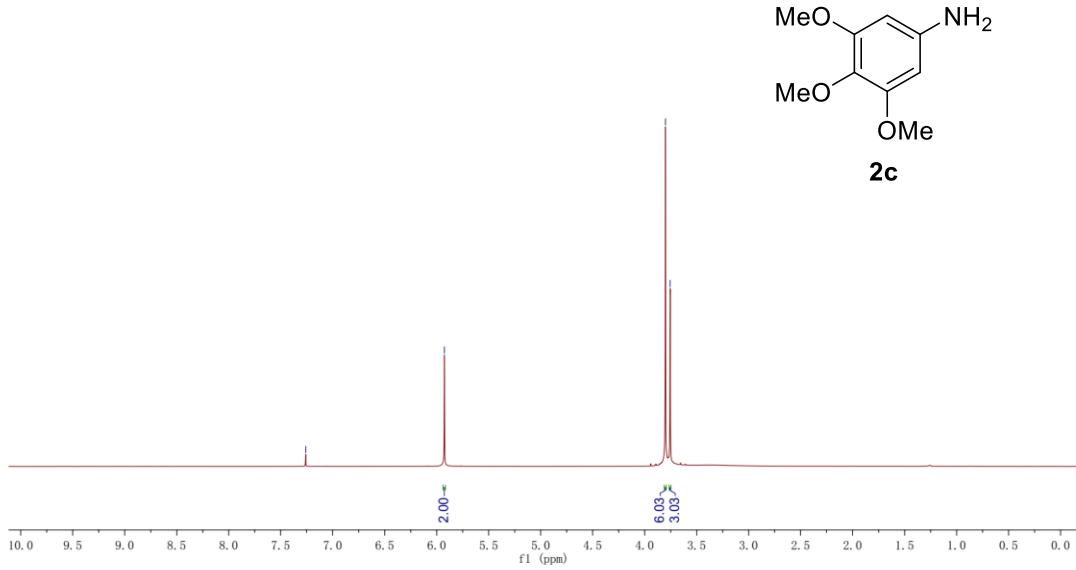

20230911-zy1-c-90-184

153.9702

143.0450

130.8528

92.7619

77.4143  
77.1600  
76.9056

61.1447

56.0018

$^{13}\text{C}$  NMR (125 MHz,  $\text{CDCl}_3$ )

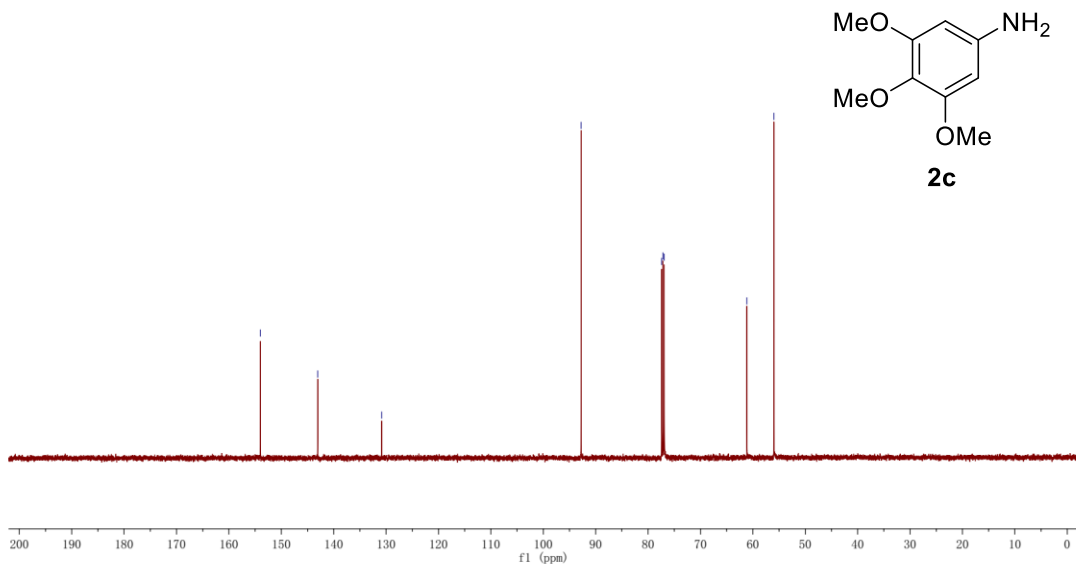



20230620-zy1-87-6

7.2601  
6.7589  
6.7414  
6.7350  
6.6643  
6.6579  
6.6443  
6.6404

3.7457  
3.2772

$^1\text{H}$  NMR (500 MHz,  $\text{CDCl}_3$ )

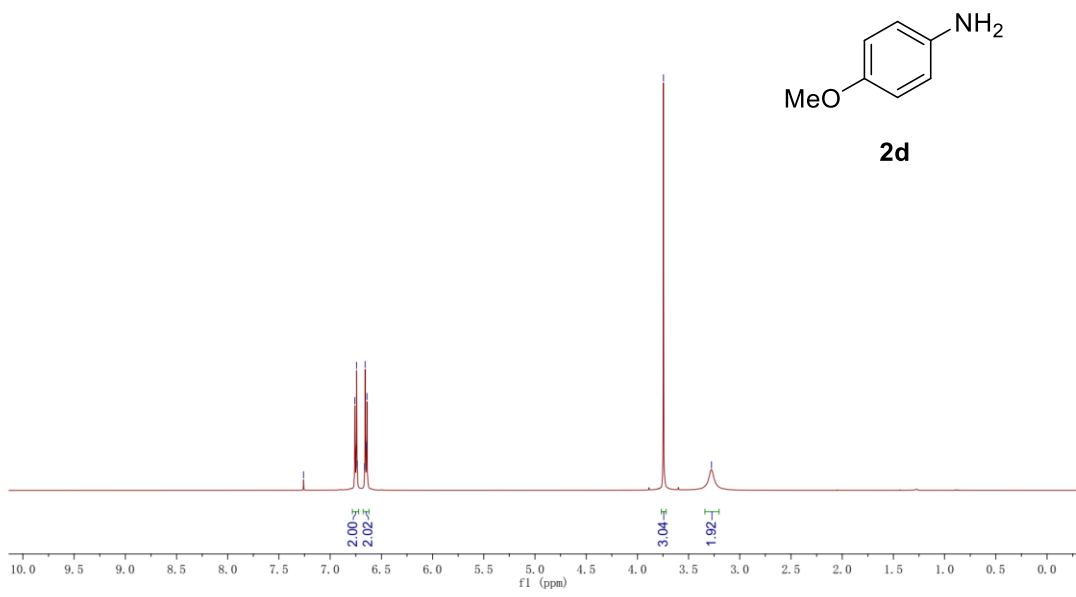

20230620-zy1-87-6

152.9345

140.0419

116.5387  
114.9349

77.4140  
77.1599  
76.9055

55.8495

$^{13}\text{C}$  NMR (125 MHz,  $\text{CDCl}_3$ )

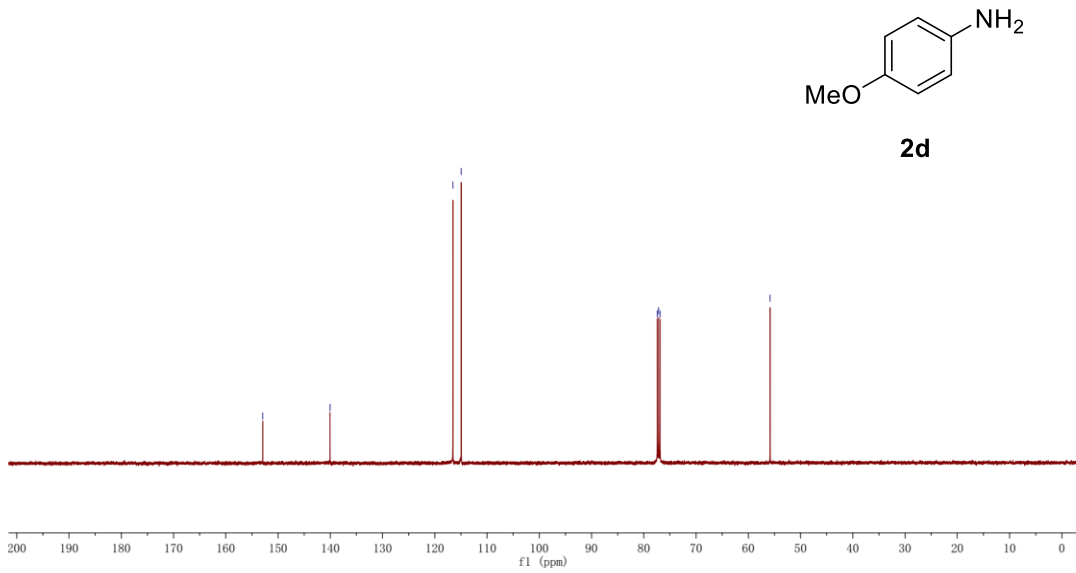

20230911-zy1-90-180

$^1\text{H}$  NMR (500 Mhz,  $\text{DMSO-}d_6$ )

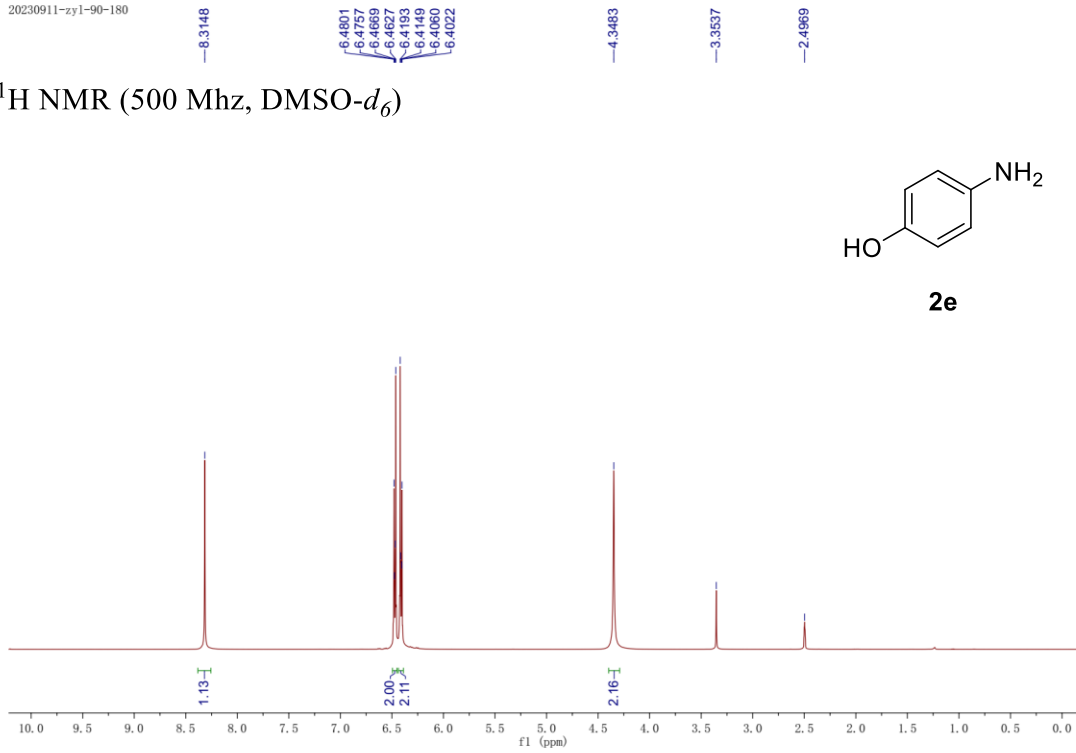

20230911-zy1-c-90-180

$^{13}\text{C}$  NMR (500 Mhz,  $\text{DMSO-}d_6$ )

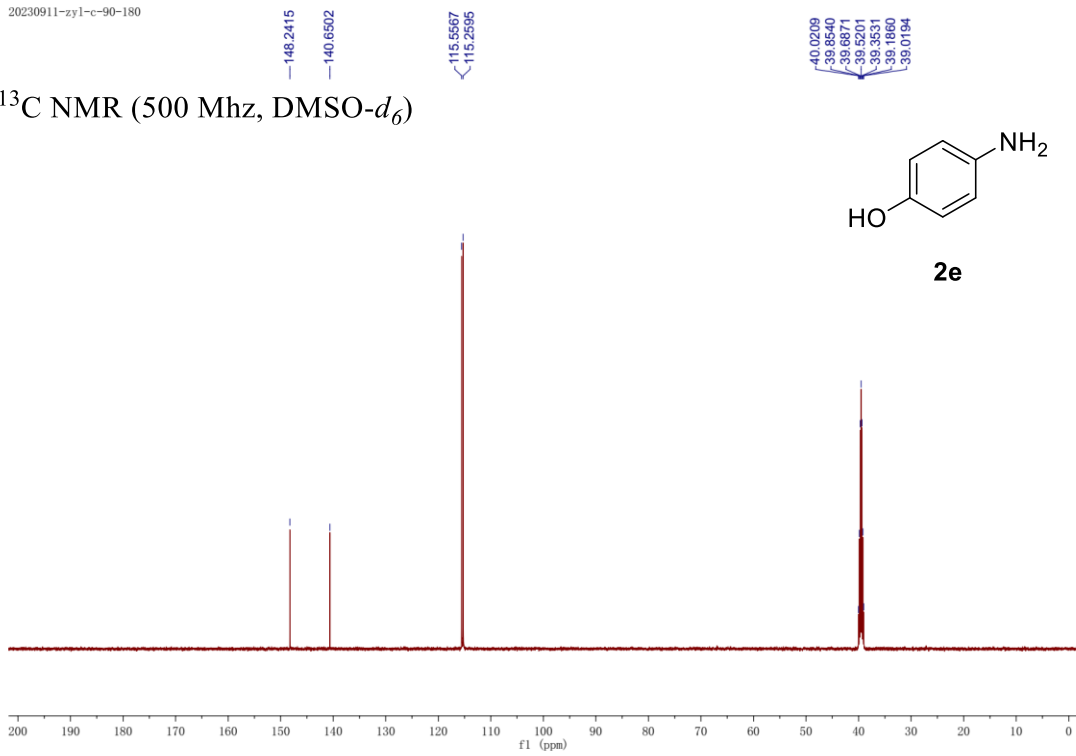

20230616-zy1-87-9

$^1\text{H}$  NMR (500 MHz,  $\text{CDCl}_3$ )

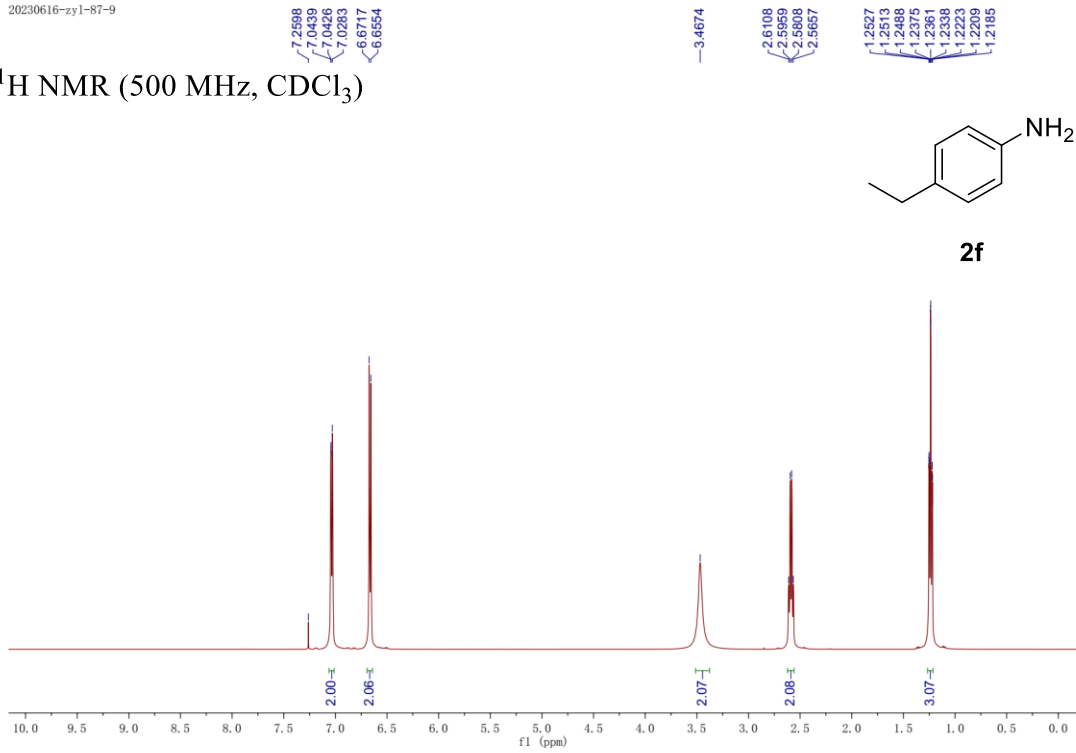

20230616-zy1-87-9

$^{13}\text{C}$  NMR (125 MHz,  $\text{CDCl}_3$ )

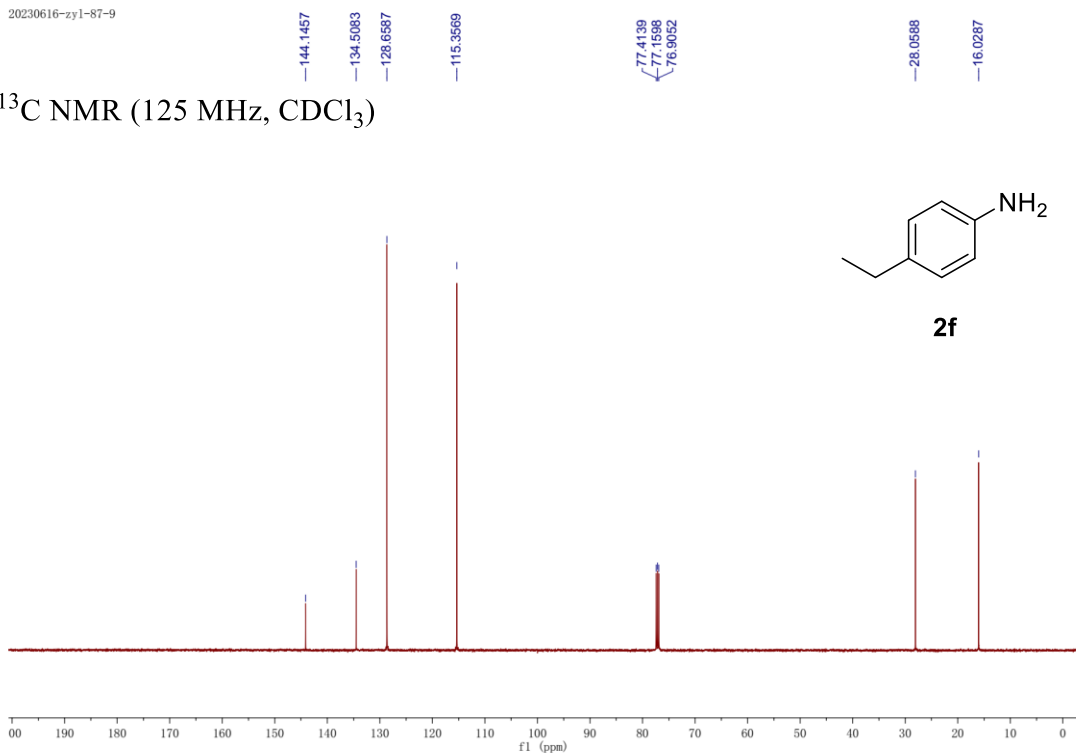

20230615-zy1-87-7

$^1\text{H}$  NMR (500 MHz,  $\text{CDCl}_3$ )

20230615-zy1-87-7

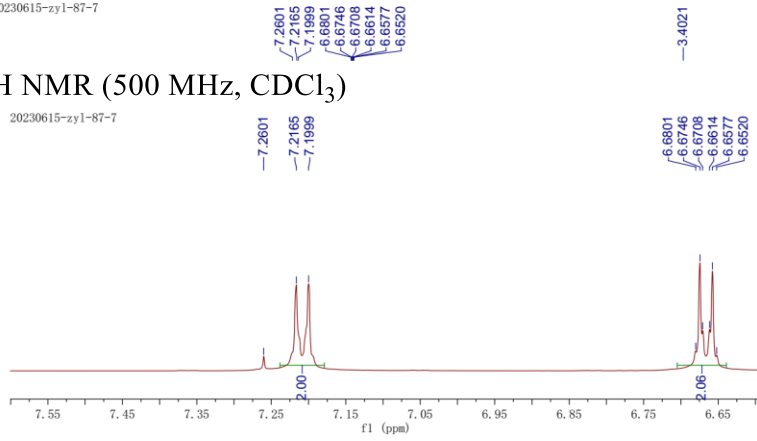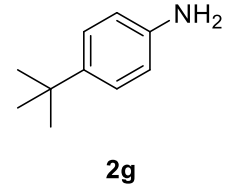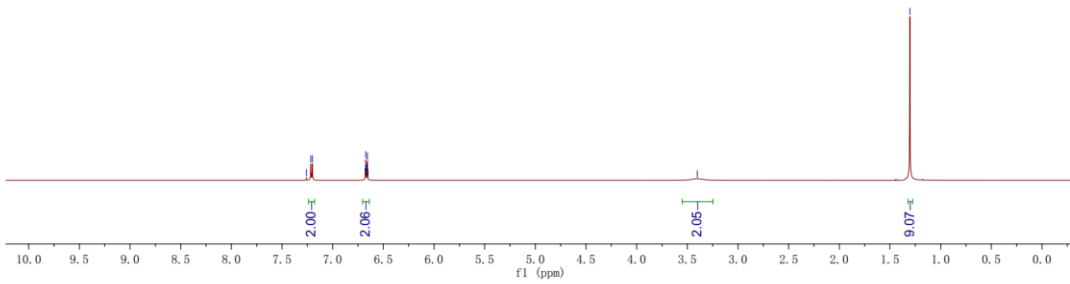

20230615-zy1-87-7

$^{13}\text{C}$  NMR (125 MHz,  $\text{CDCl}_3$ )

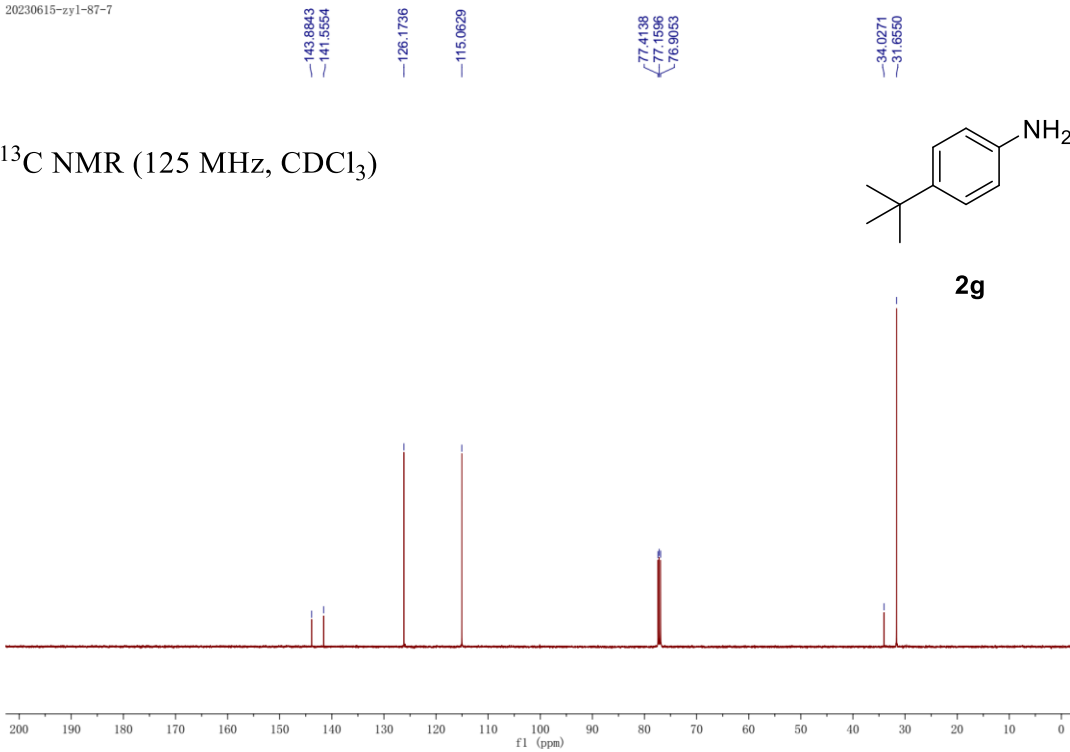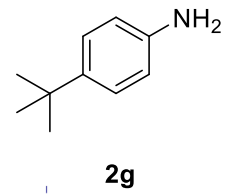

20230907-zy1-90-181

$^1\text{H}$  NMR (500 MHz,  $\text{CDCl}_3$ )

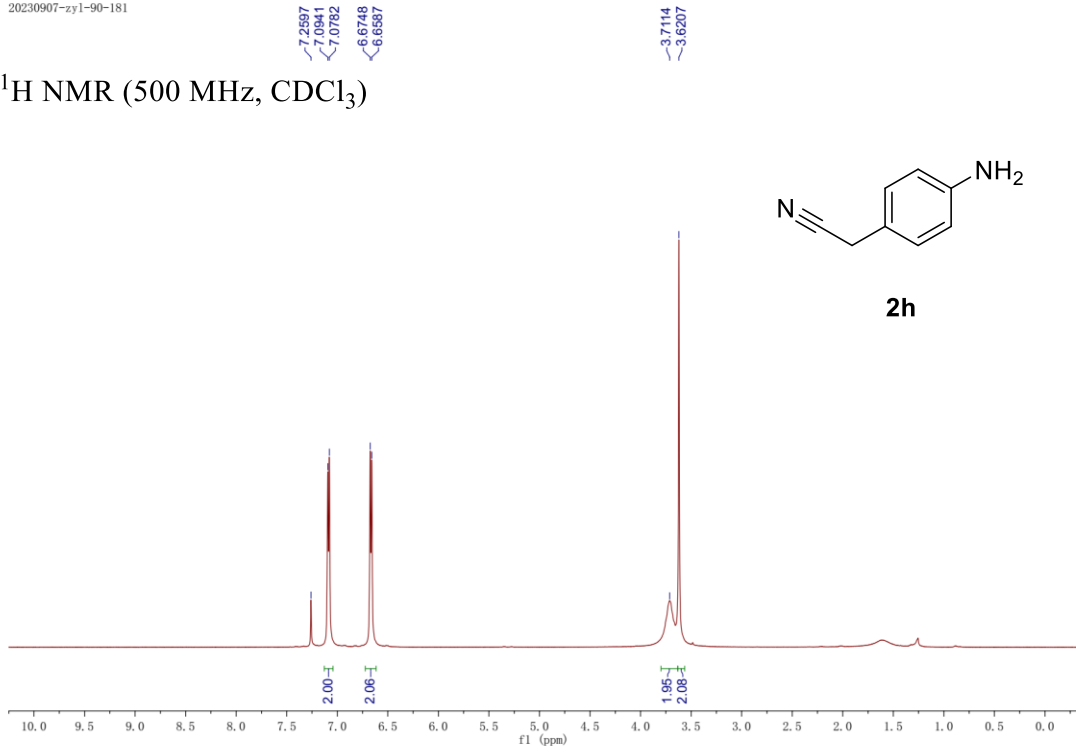

20230911-zy1-c-90-181

$^{13}\text{C}$  NMR (500 Mhz,  $\text{DMSO}-d_6$ )

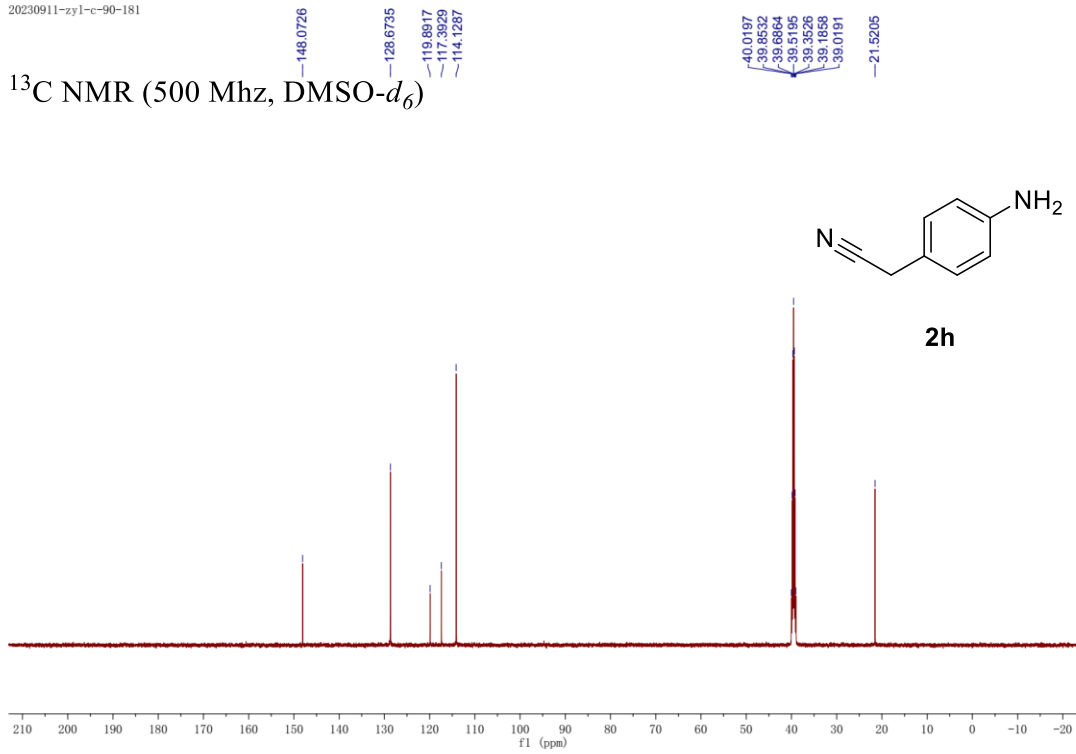

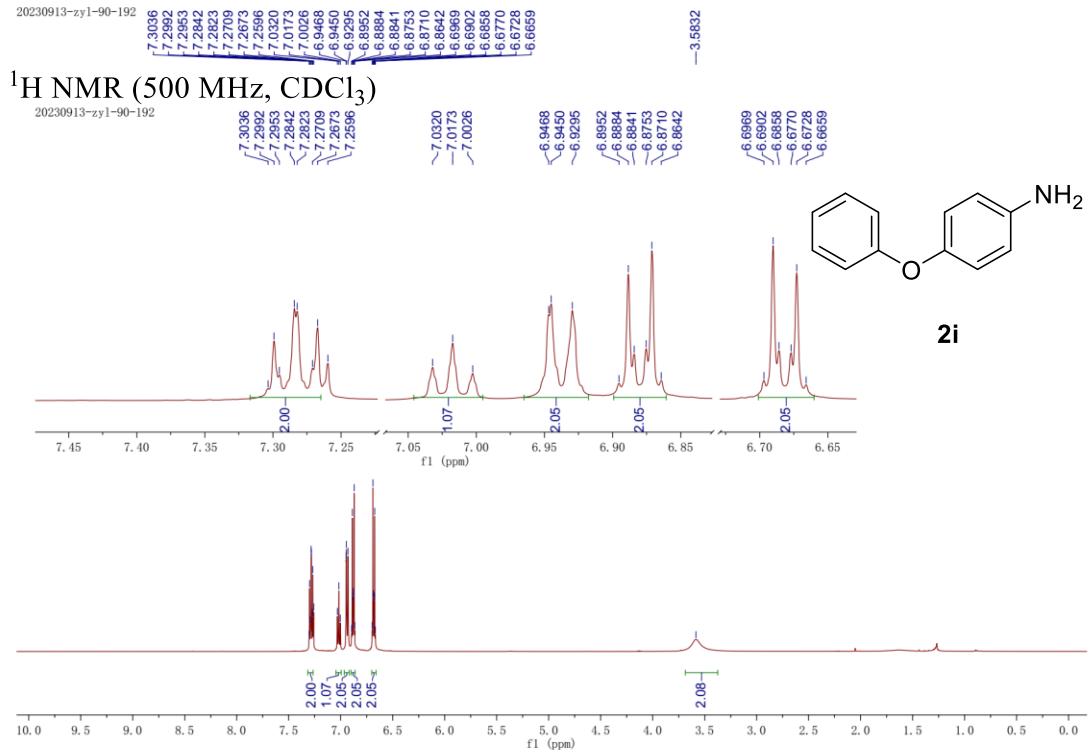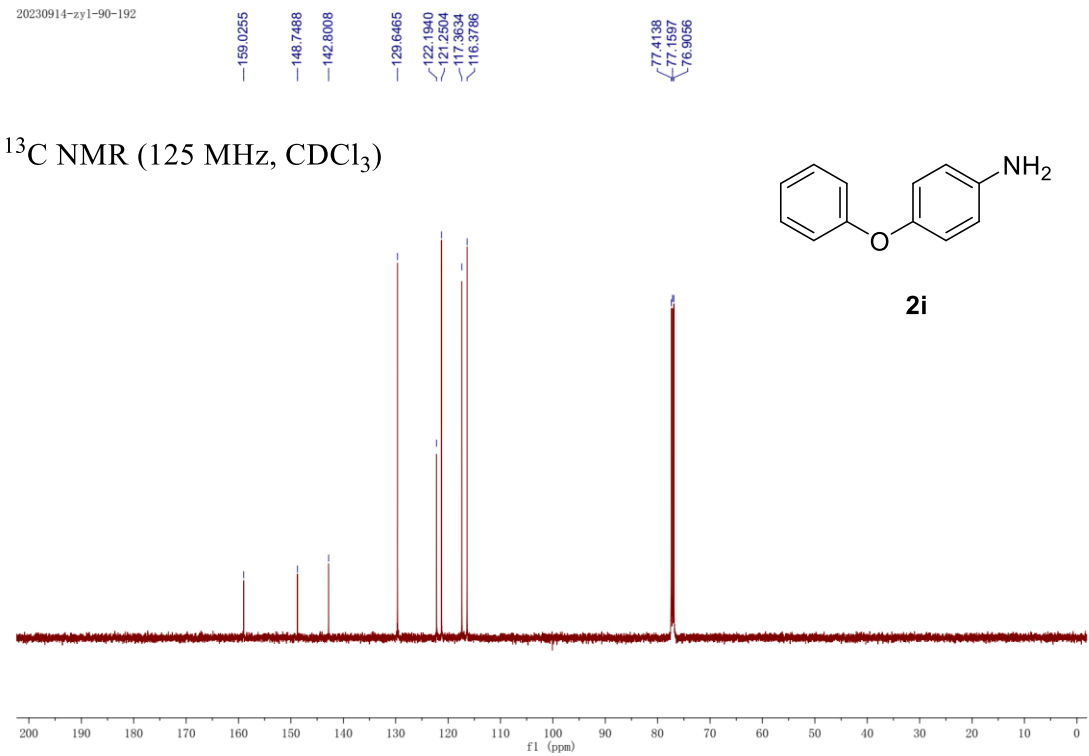

20230615-zy1-87-14

$^1\text{H}$  NMR (500 MHz,  $\text{CDCl}_3$ )

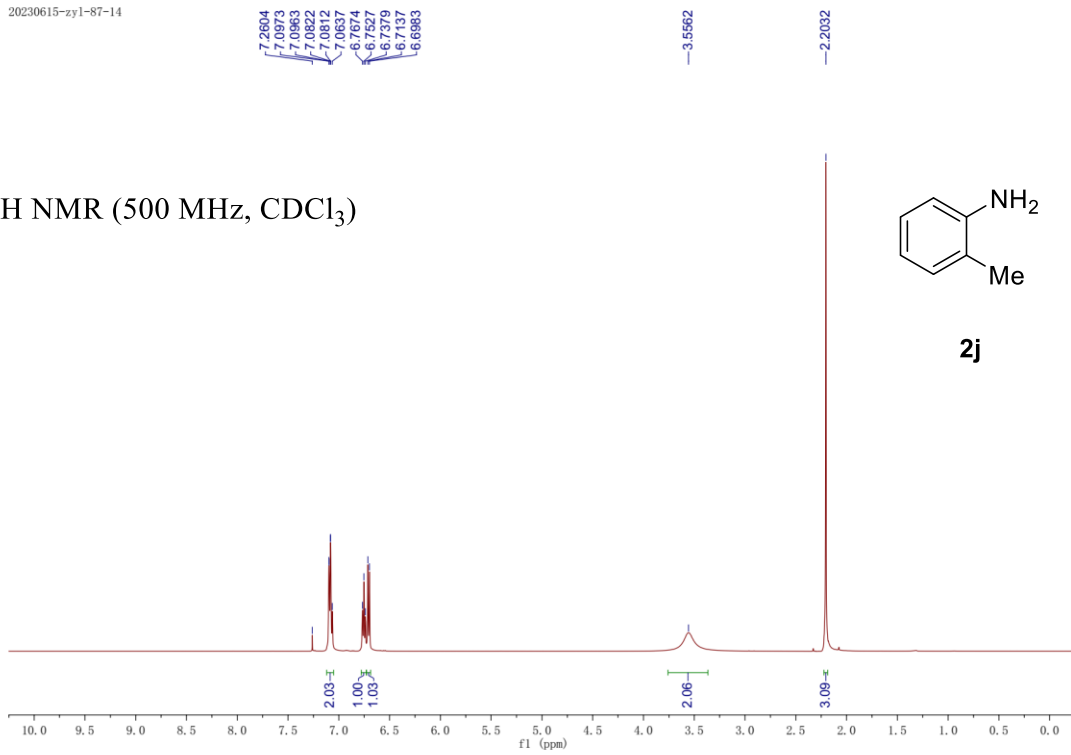

20230615-zy1-87-14

$^{13}\text{C}$  NMR (125 MHz,  $\text{CDCl}_3$ )

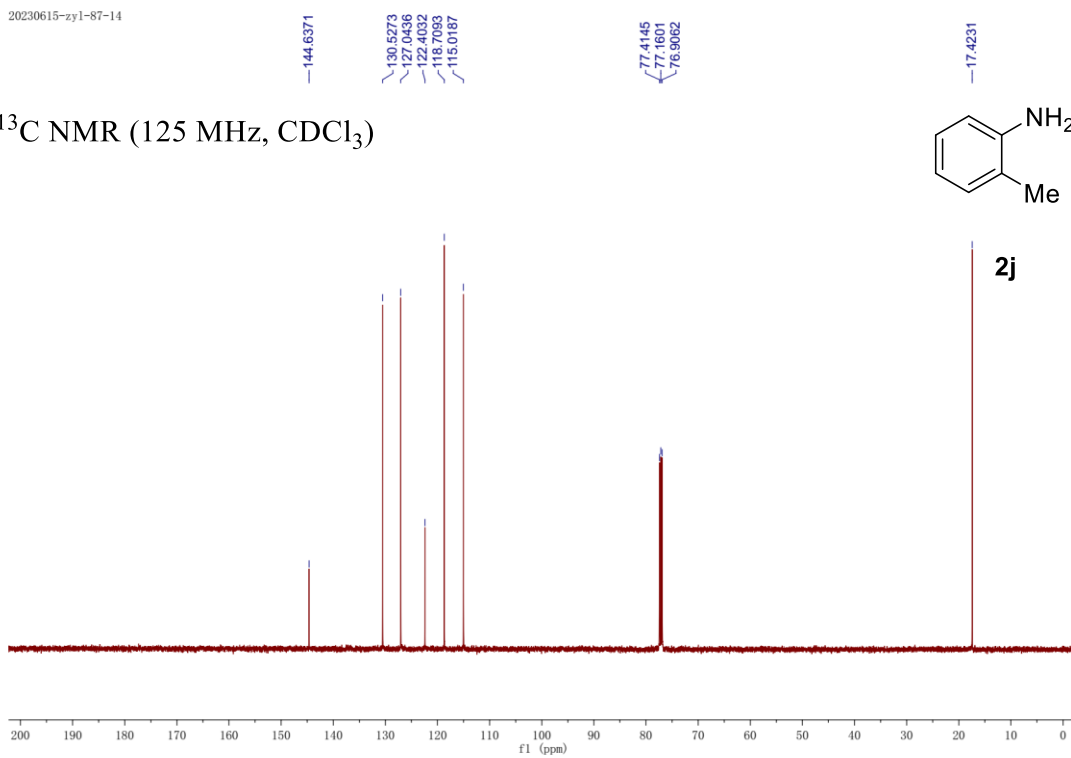

20230616-zy1-87-10

$^1\text{H}$  NMR (500 MHz,  $\text{CDCl}_3$ )

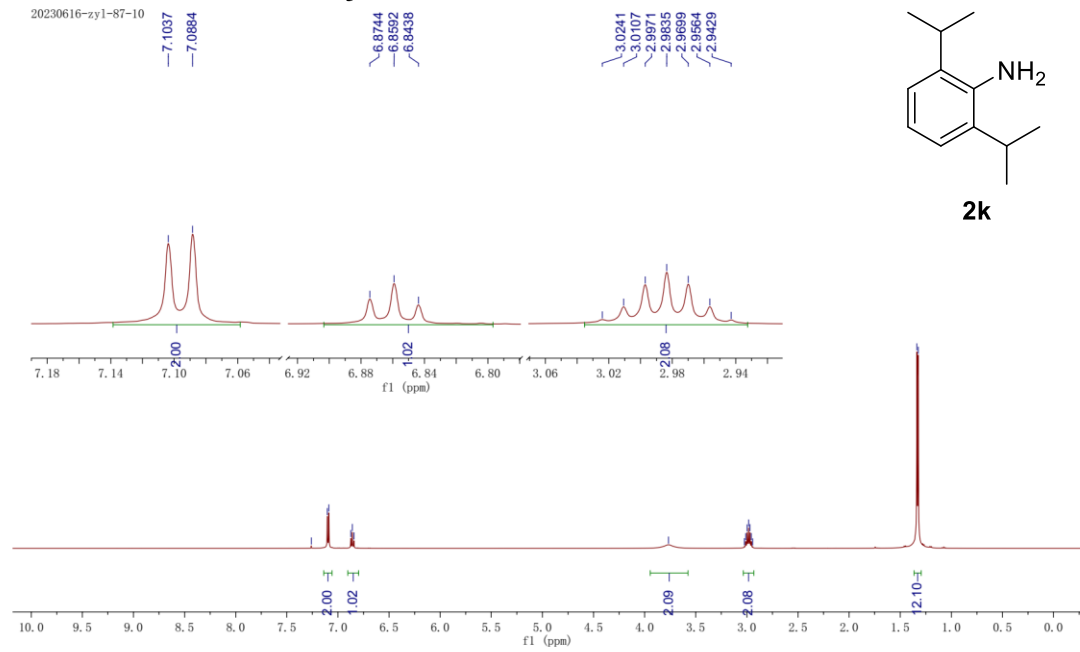

20230616-zy1-87-10

$^{13}\text{C}$  NMR (125 MHz,  $\text{CDCl}_3$ )

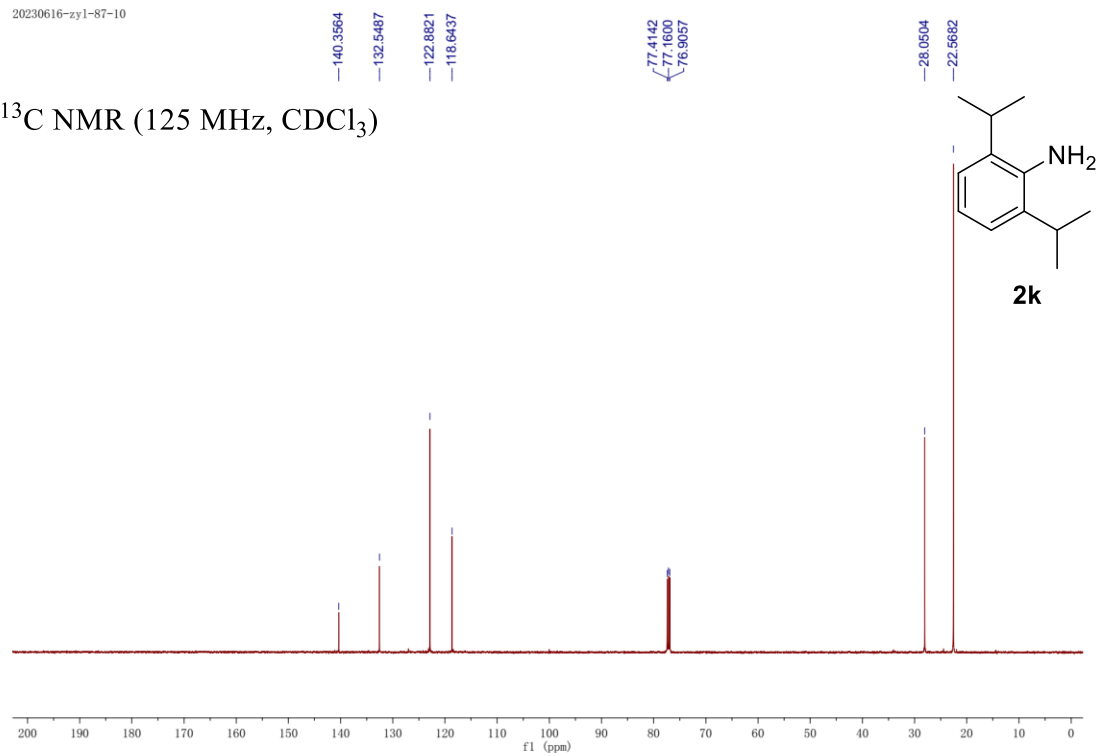



20230620-zy1-87-12

$^1\text{H}$  NMR (500 MHz,  $\text{CDCl}_3$ )

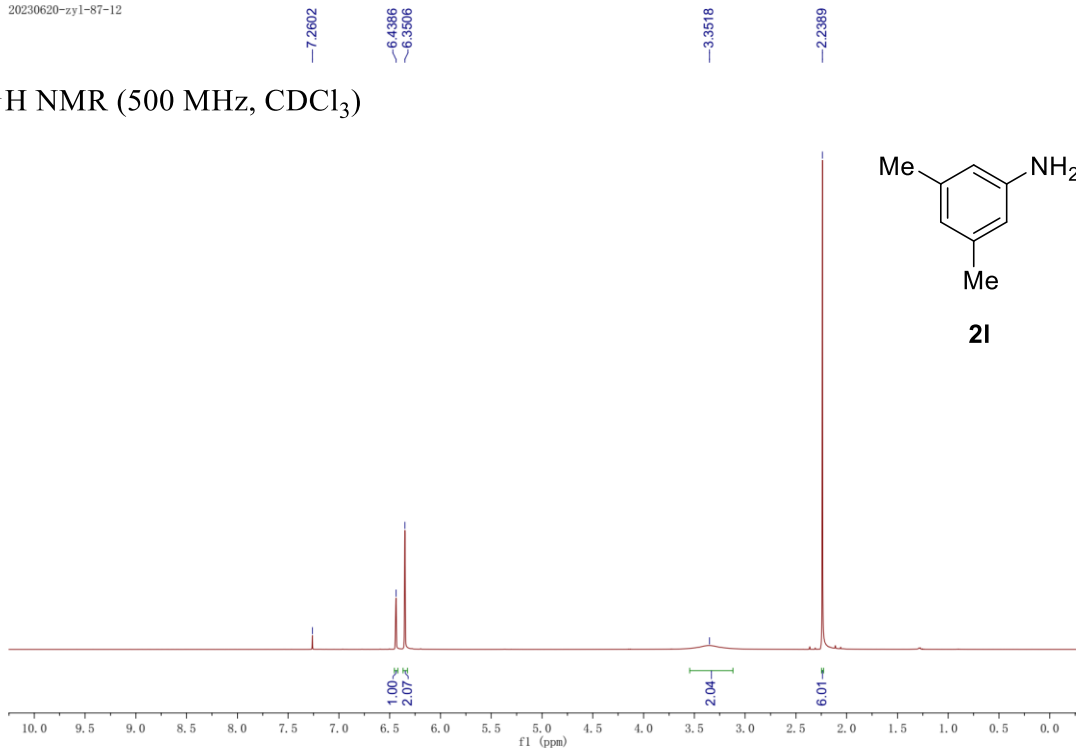

20230620-zy1-87-12

$^{13}\text{C}$  NMR (125 MHz,  $\text{CDCl}_3$ )

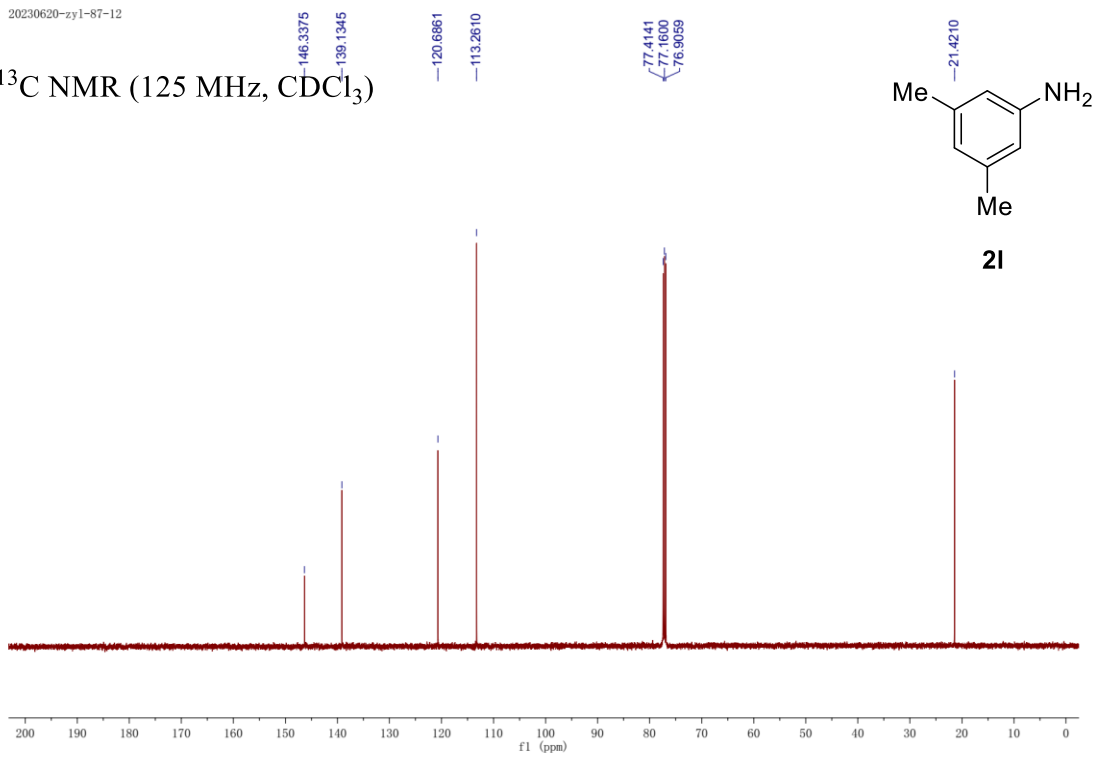

20230531-zy1-87-5

7.2605  
7.1089  
7.1061  
7.0927  
6.6090  
6.5917

3.5859

$^1\text{H}$  NMR (500 MHz,  $\text{CDCl}_3$ )

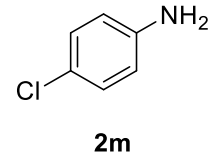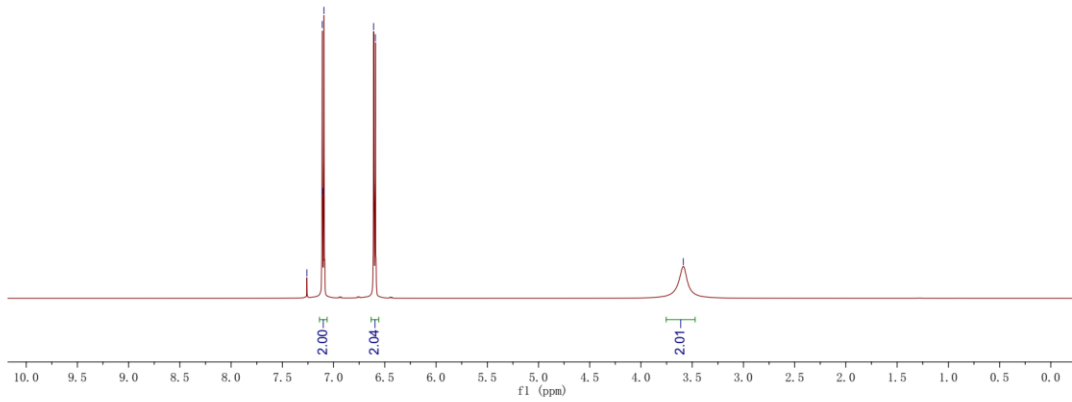

20230531-zy1-87-5

145.0692

129.1973

123.1924

116.3262

77.4089  
77.1598  
76.9026

$^{13}\text{C}$  NMR (125 MHz,  $\text{CDCl}_3$ )

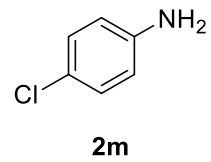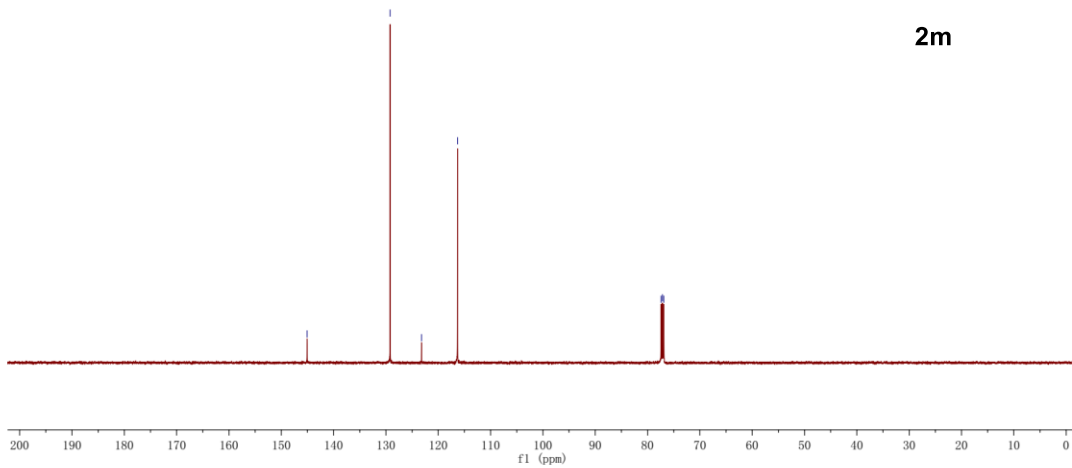

20230620-zy1-87-8

$^1\text{H}$  NMR (500 MHz,  $\text{CDCl}_3$ )

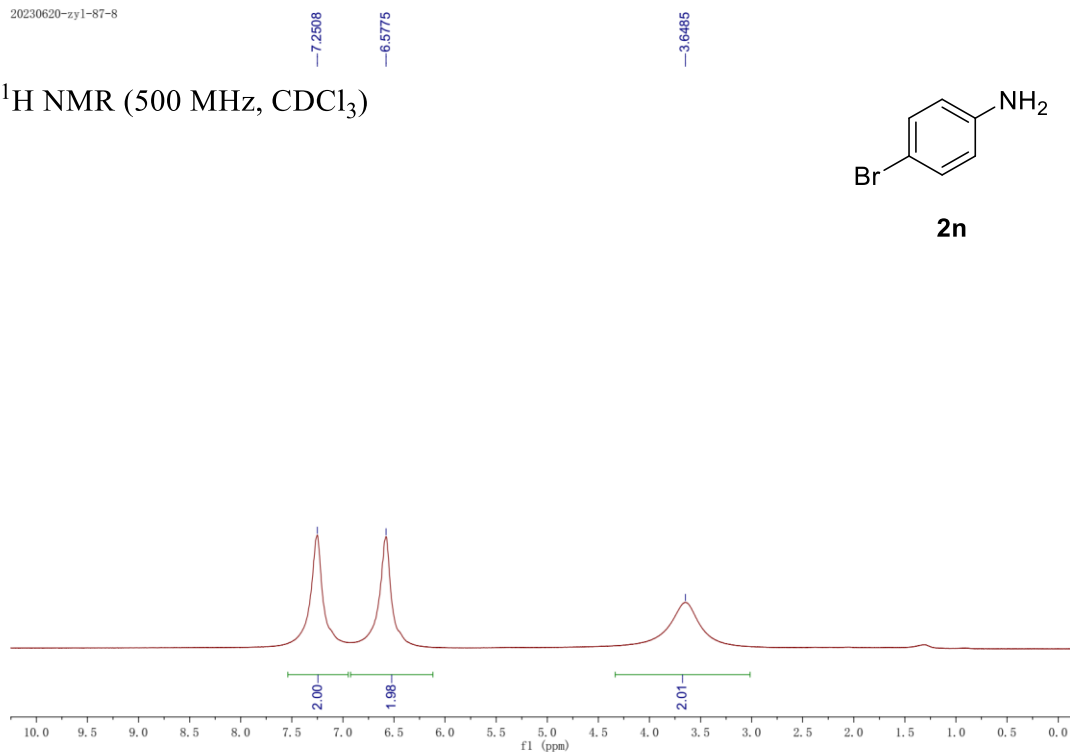

20230620-zy1-87-8

$^{13}\text{C}$  NMR (125 MHz,  $\text{CDCl}_3$ )

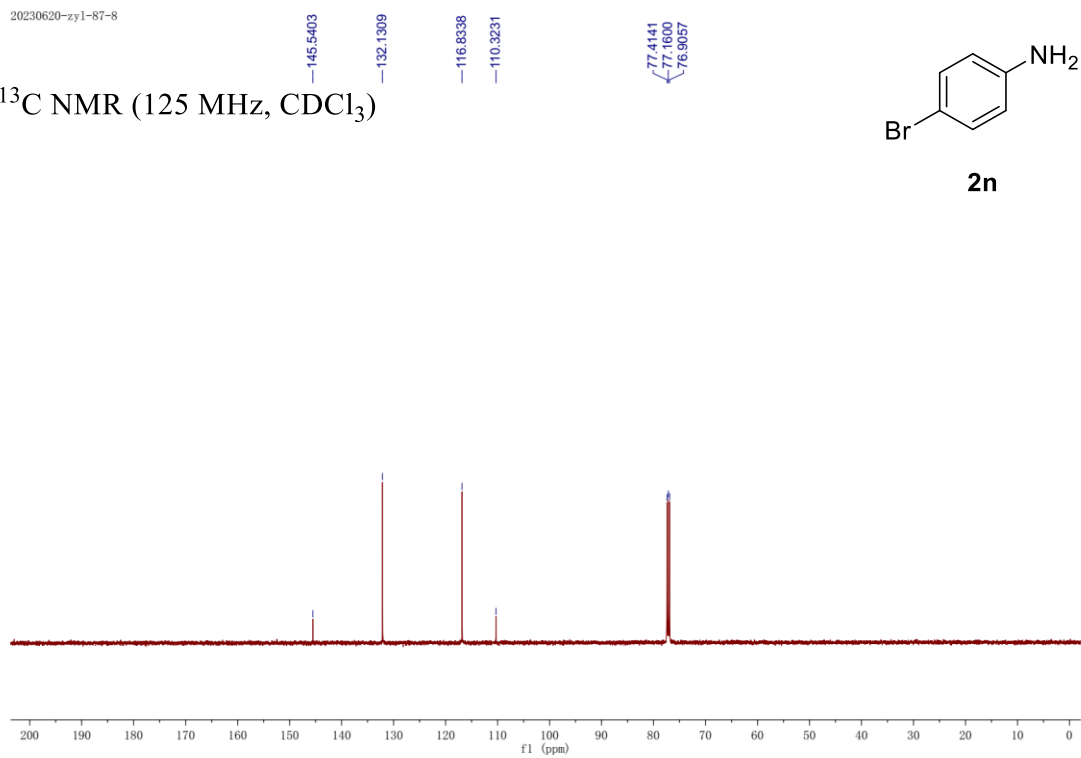

ZYL-82-14-H-20221214-ZYL

$^1\text{H}$  NMR (500 MHz,  $\text{CDCl}_3$ )

ZYL-82-14-H-20221214-ZYL

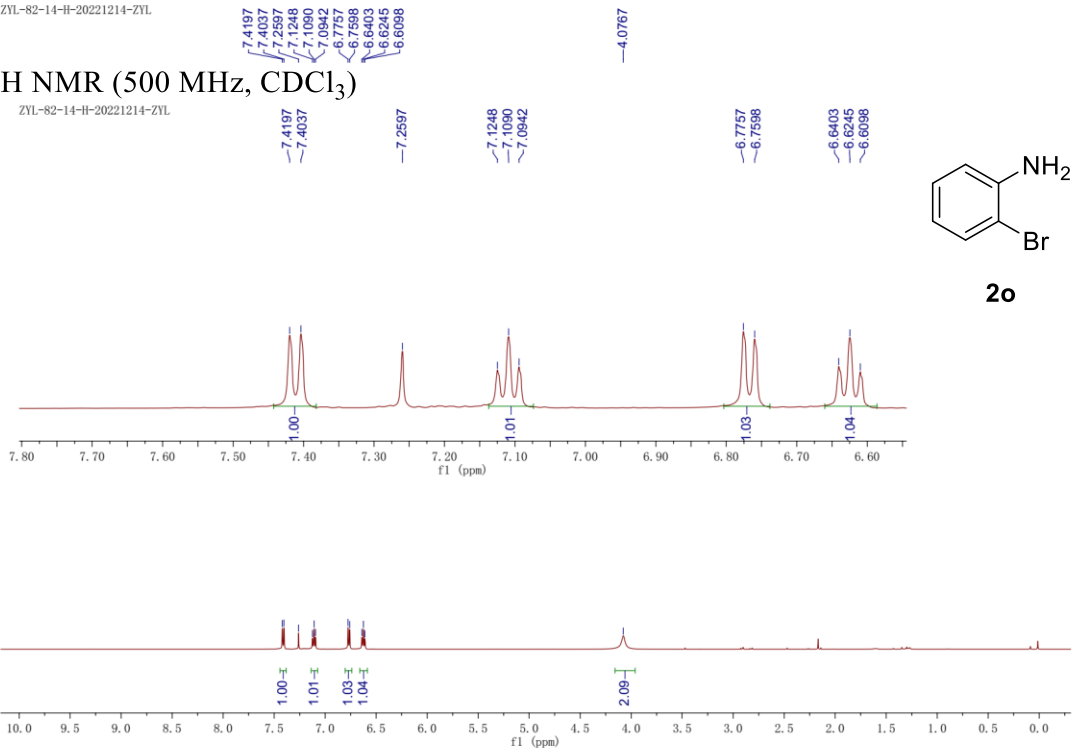

20230620-zy1-87-11

$^{13}\text{C}$  NMR (125 MHz,  $\text{CDCl}_3$ )

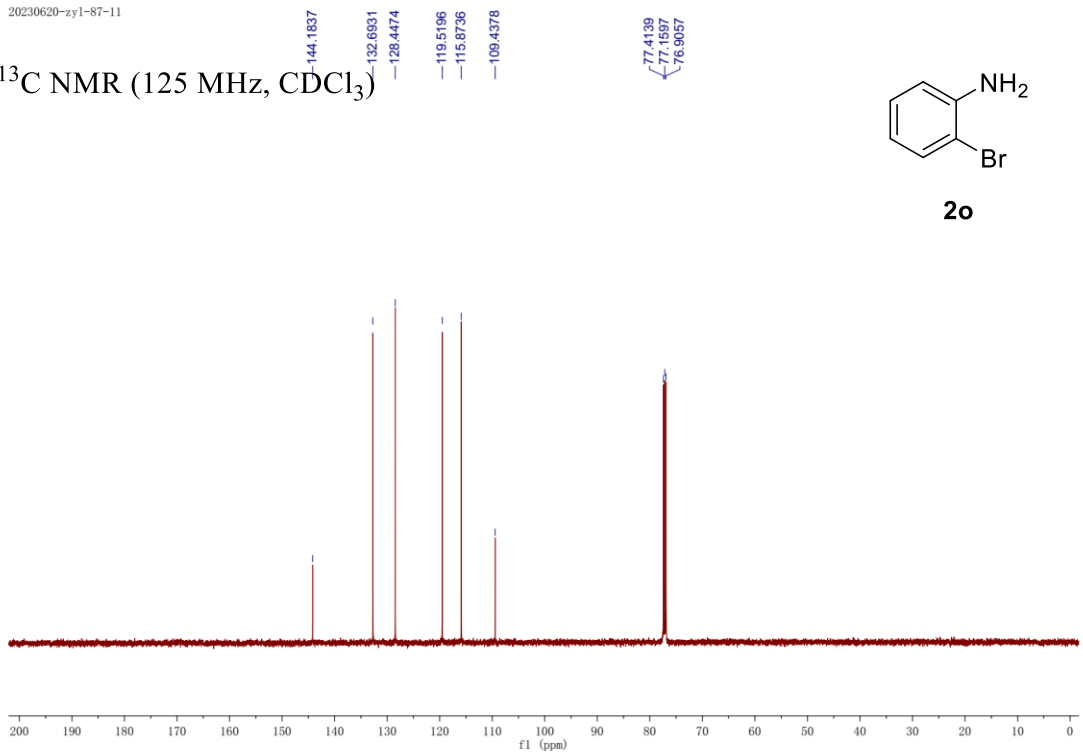

20230531-zy1-87-4

7.4092  
7.4045  
7.3920  
7.3876  
7.3826  
7.3785  
7.3694  
7.2602  
6.6476  
6.6429  
6.6385  
6.6319  
6.6295  
6.6254  
6.6210

4.2294

$^1\text{H}$  NMR (500 MHz,  $\text{CDCl}_3$ )

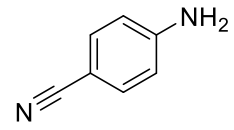

**2p**

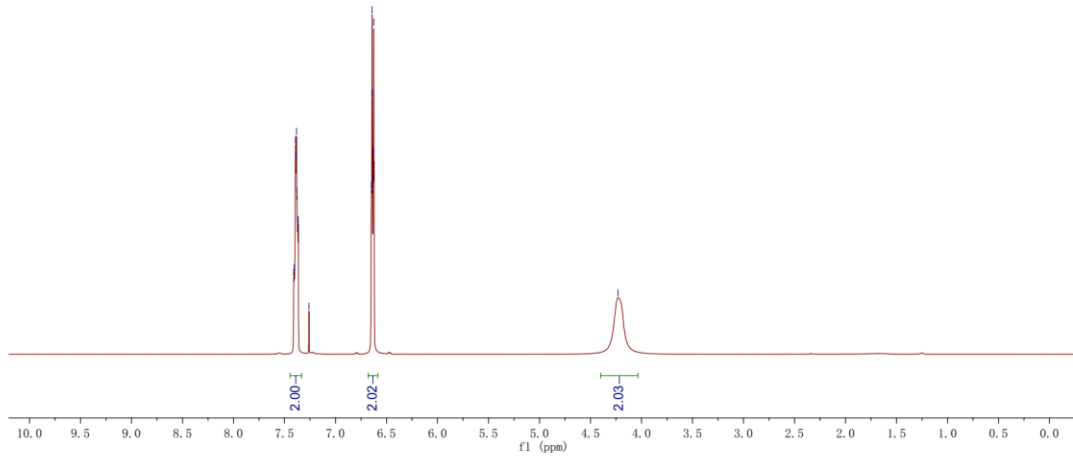

20230531-zy1-87-4

150.8021

133.8797

120.3871

114.5307

99.8454

77.4155

77.1603

76.9064

$^{13}\text{C}$  NMR (125 MHz,  $\text{CDCl}_3$ )

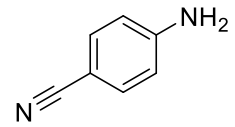

**2p**

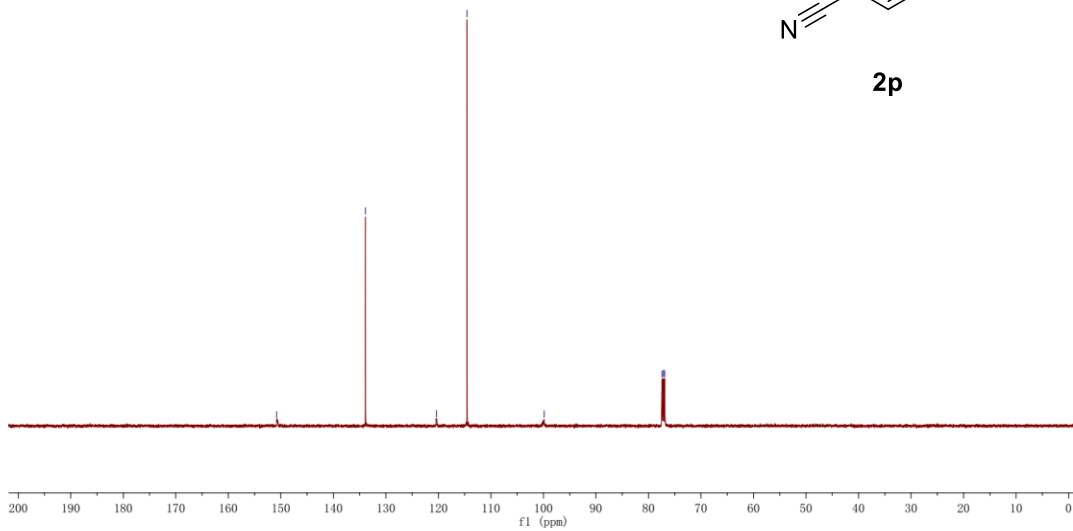

20230911-zy1-90-106

7.3998  
7.3830  
7.2596  
6.6949  
6.6781

3.9293

$^1\text{H}$  NMR (500 MHz,  $\text{CDCl}_3$ )

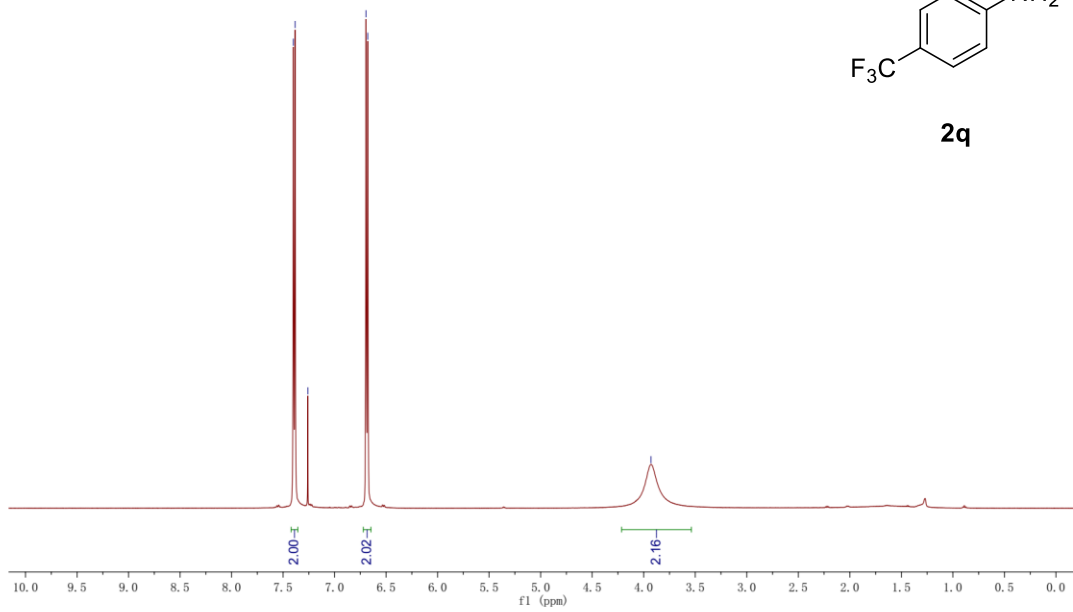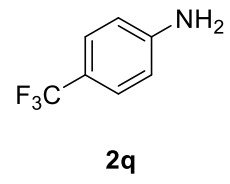

20230911-zy1-c-90-106

149.5140  
128.2046  
128.6882  
128.8381  
128.8376  
128.7143  
128.6432  
120.6747  
120.3690  
120.1494  
119.8990  
114.3060

77.4139  
77.1568  
76.9058

$^{13}\text{C}$  NMR (125 MHz,  $\text{CDCl}_3$ )

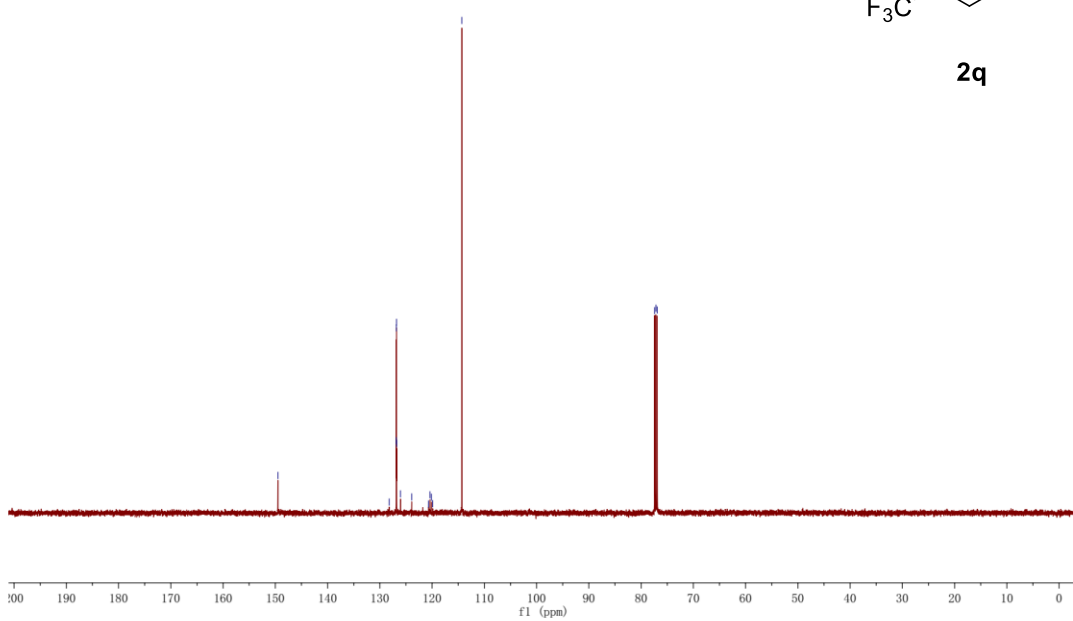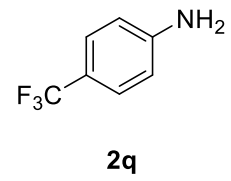

-61.2213

$^{19}\text{F}$  NMR (470 MHz,  $\text{CDCl}_3$ )

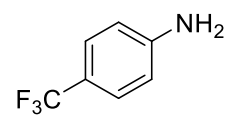

**2q**

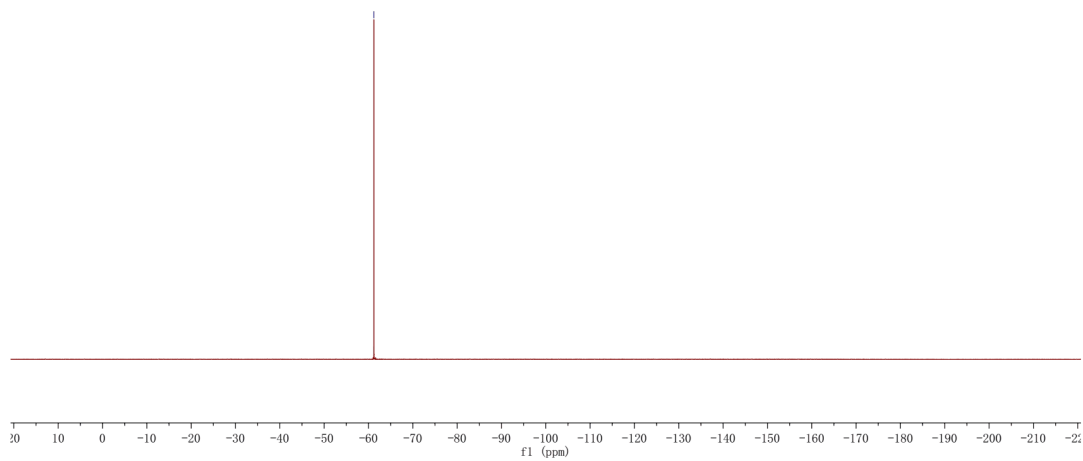

20230531-zy1-87-3

7.8578  
7.8447  
7.2601  
6.6347  
6.6215

4.3160  
4.3022  
4.0675

1.3651  
1.3619  
1.3528

$^1\text{H}$  NMR (500 MHz,  $\text{CDCl}_3$ )

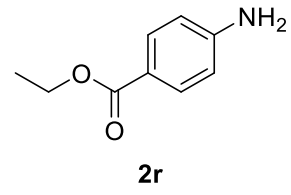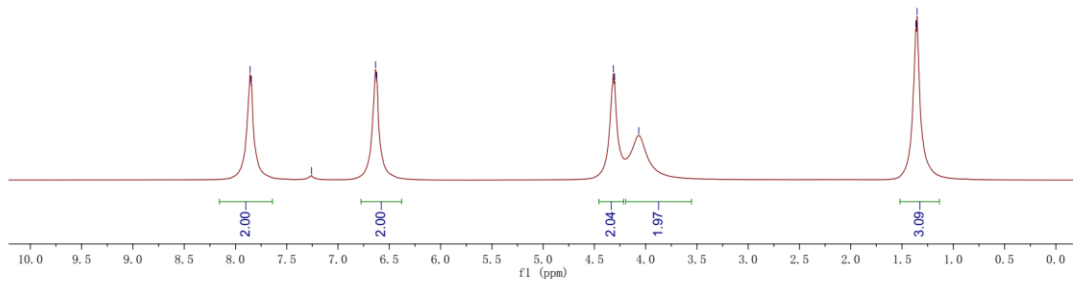

20230531-zy1-87-3

166.6407

150.8896

131.6375

120.0733

113.8639

77.4142  
77.1599  
76.9057

60.4104

14.5198

$^{13}\text{C}$  NMR (125 MHz,  $\text{CDCl}_3$ )

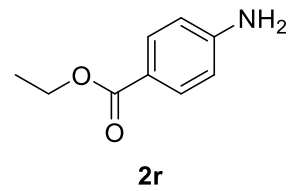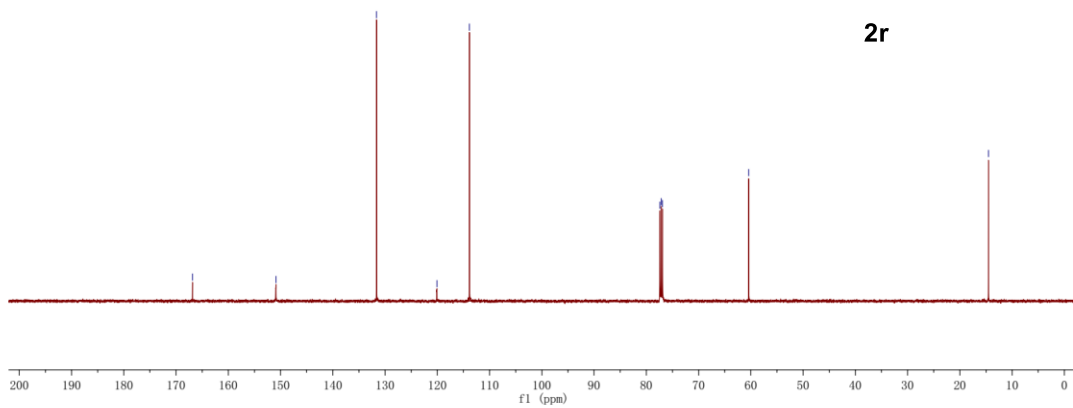



20230531-zy1-87-2

$^1\text{H}$  NMR (500 MHz,  $\text{CDCl}_3$ )

7.5834  
7.5046  
7.2889  
7.2827  
6.9607

4.0269

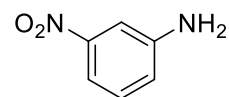

**2s**

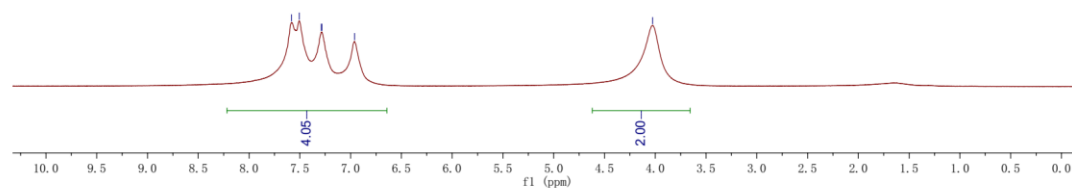

20230531-zy1-87-2

$^{13}\text{C}$  NMR (125 MHz,  $\text{CDCl}_3$ )

149.3413  
147.5706

130.0282

120.7474

113.2446

109.1203

77.4045  
77.1505  
76.8962

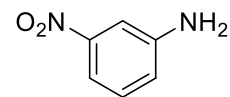

**2s**

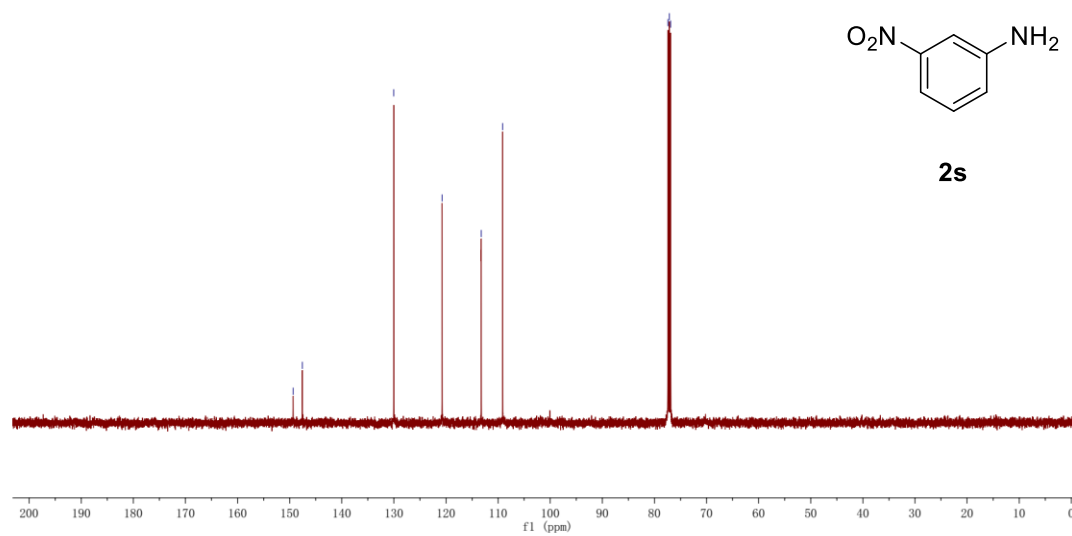

20230911-zy1-90-185

$^1\text{H}$  NMR (500 MHz,  $\text{CDCl}_3$ )

20230911-zy1-90-185

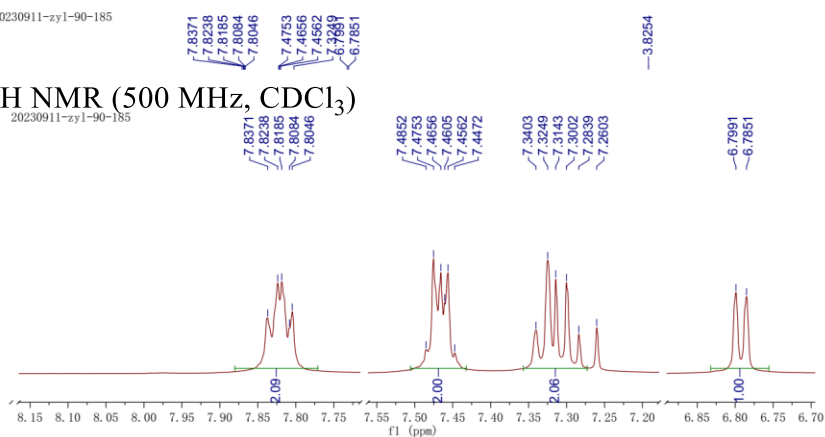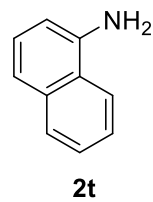

20230911-zy1-c-90-185

$^{13}\text{C}$  NMR (125 MHz,  $\text{CDCl}_3$ )

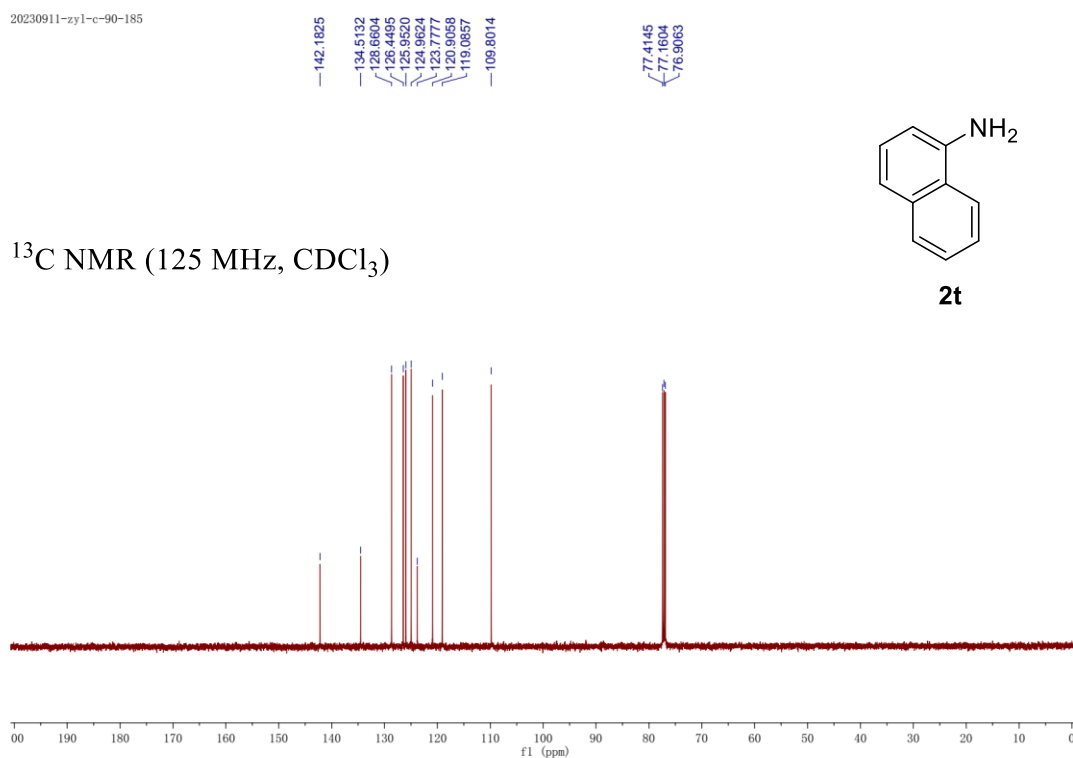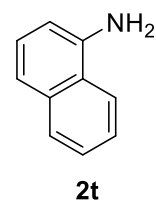

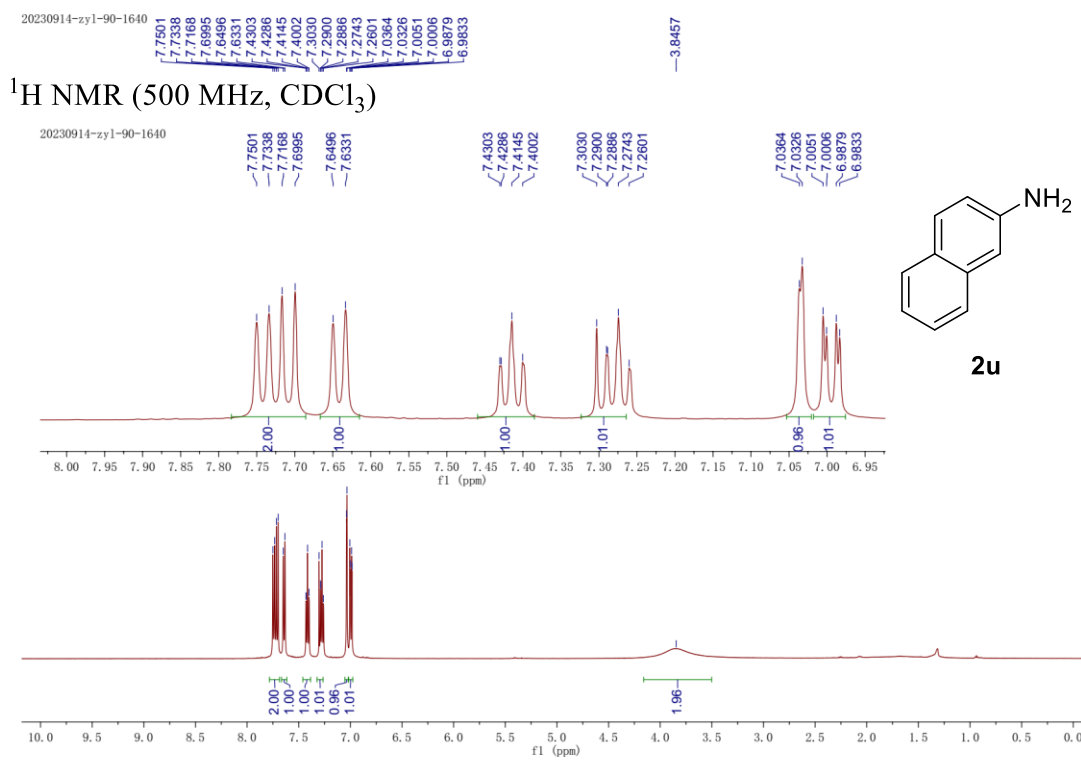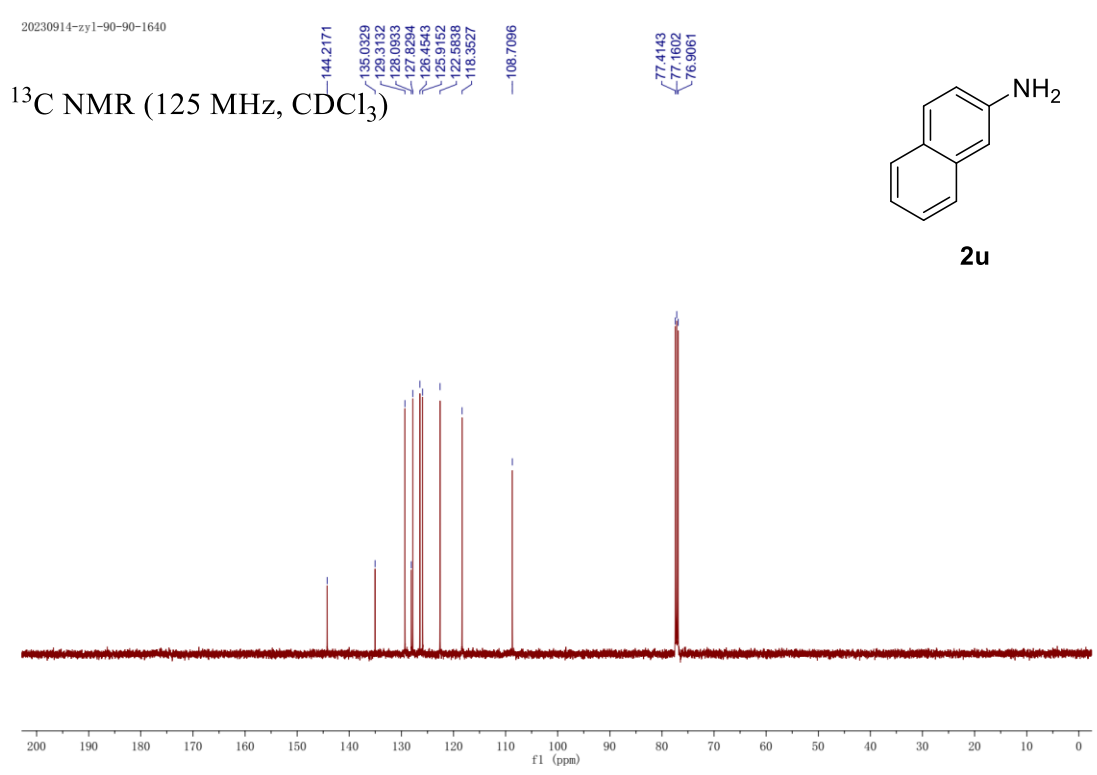

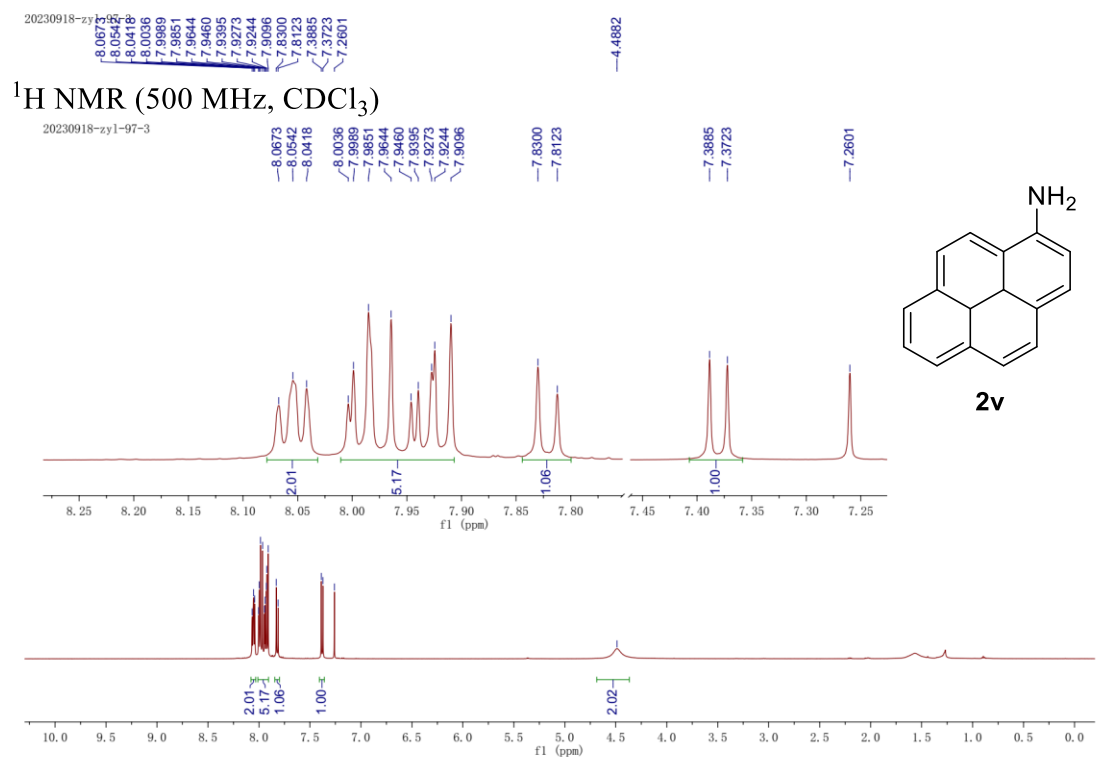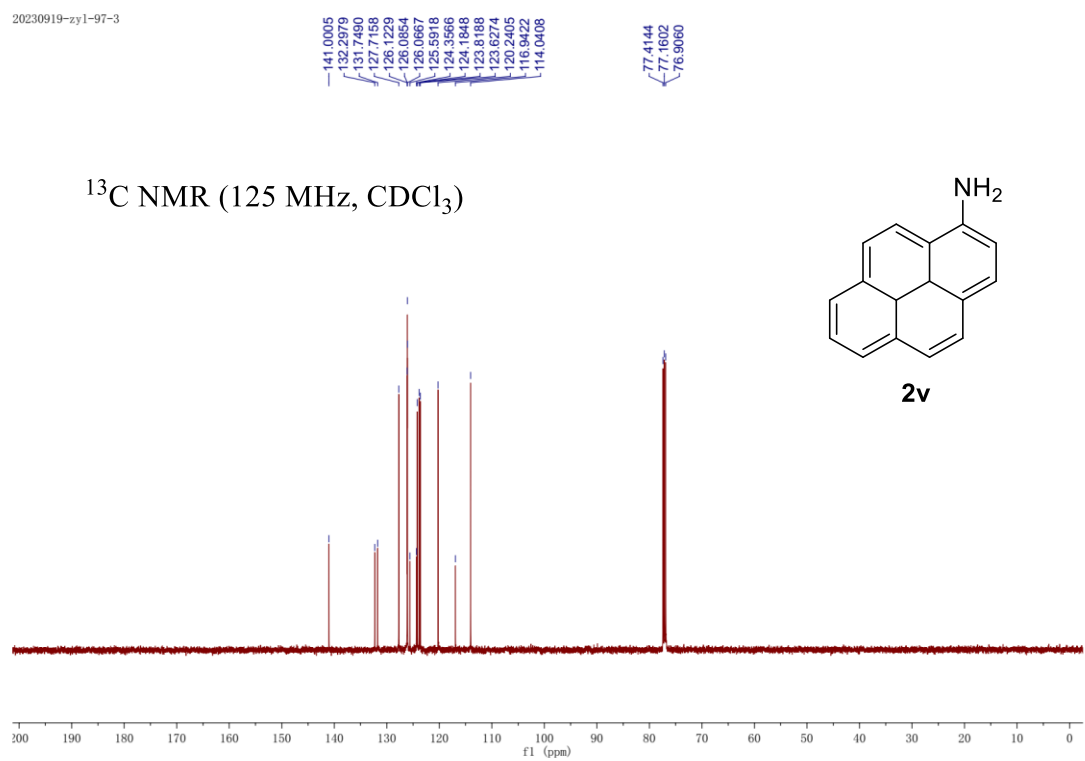

20230913-zy1-90-191

$^1\text{H}$  NMR (500 MHz,  $\text{CDCl}_3$ )

20230913-zy1-90-191

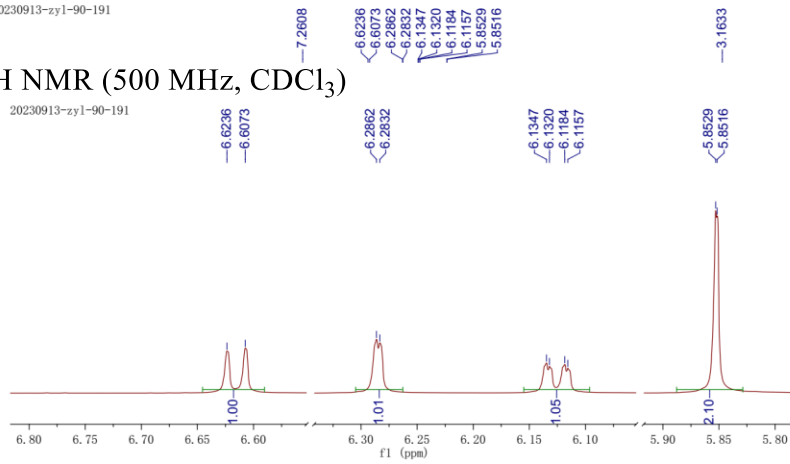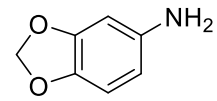

2w

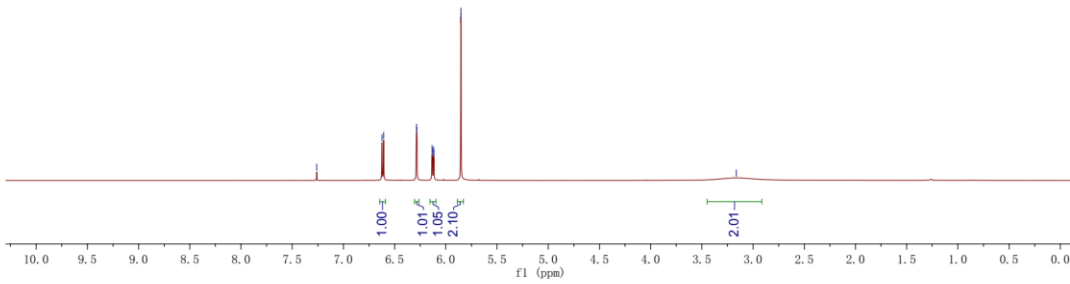

20230914-zy1-90-191

$^{13}\text{C}$  NMR (125 MHz,  $\text{CDCl}_3$ )

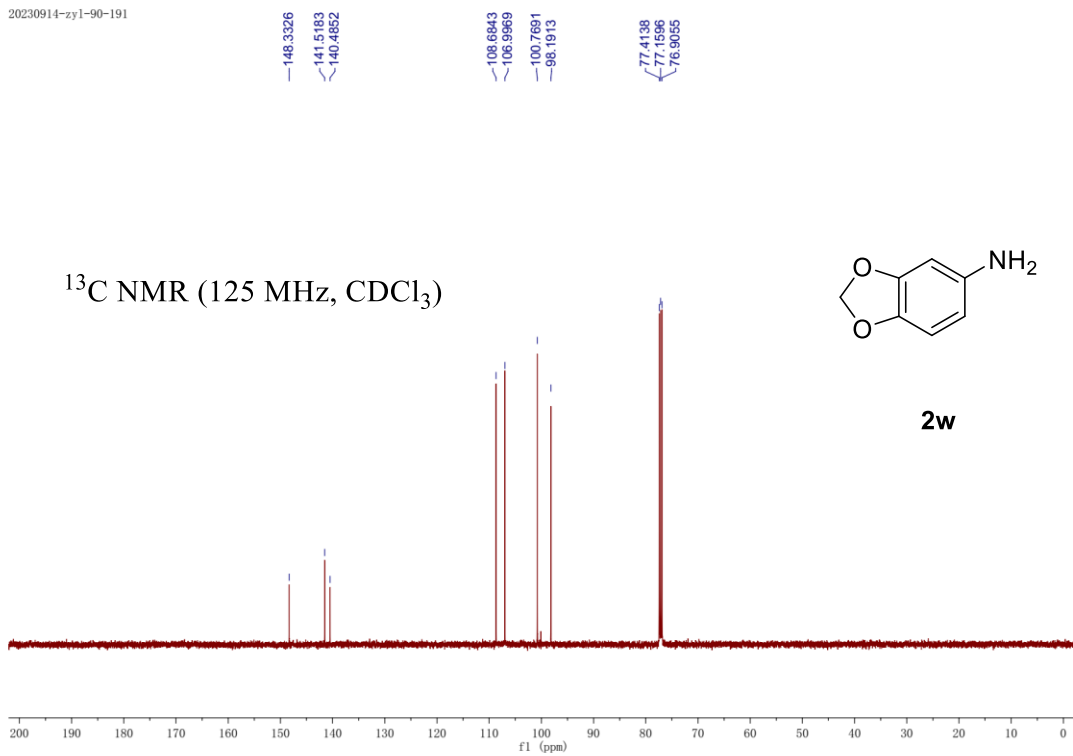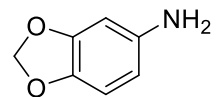

2w

20232912-zy1-90-187-h

### $^1\text{H}$ NMR (500 Mhz, $\text{DMSO-}d_6$ )

20232912-zy1-90-187-h

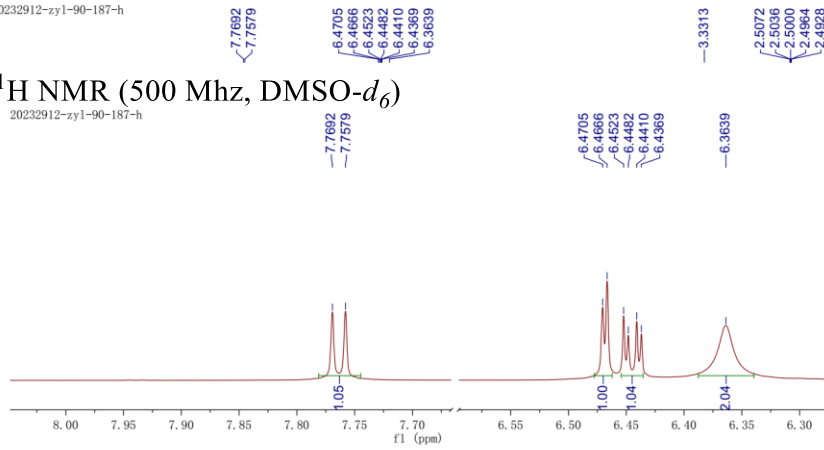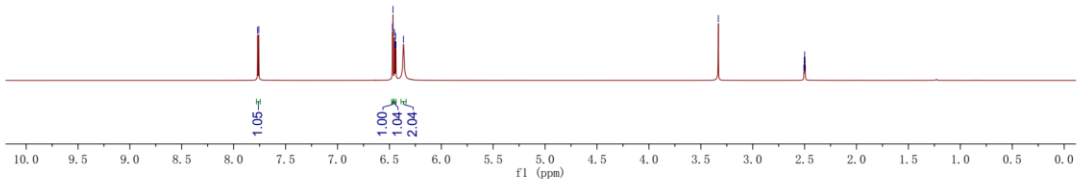

20232912-zy1-90-187-c

### $^{13}\text{C}$ NMR (500 Mhz, $\text{DMSO-}d_6$ )

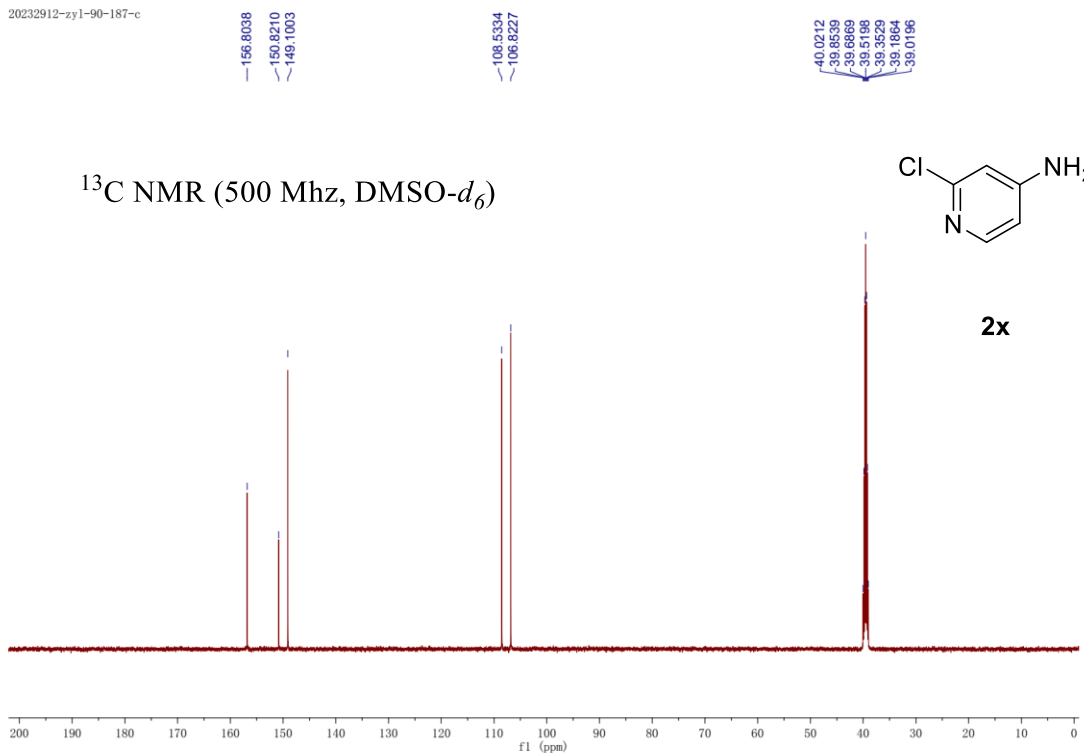

20230425-xy1-90-47

$^1\text{H}$  NMR (500 MHz,  $\text{CDCl}_3$ )

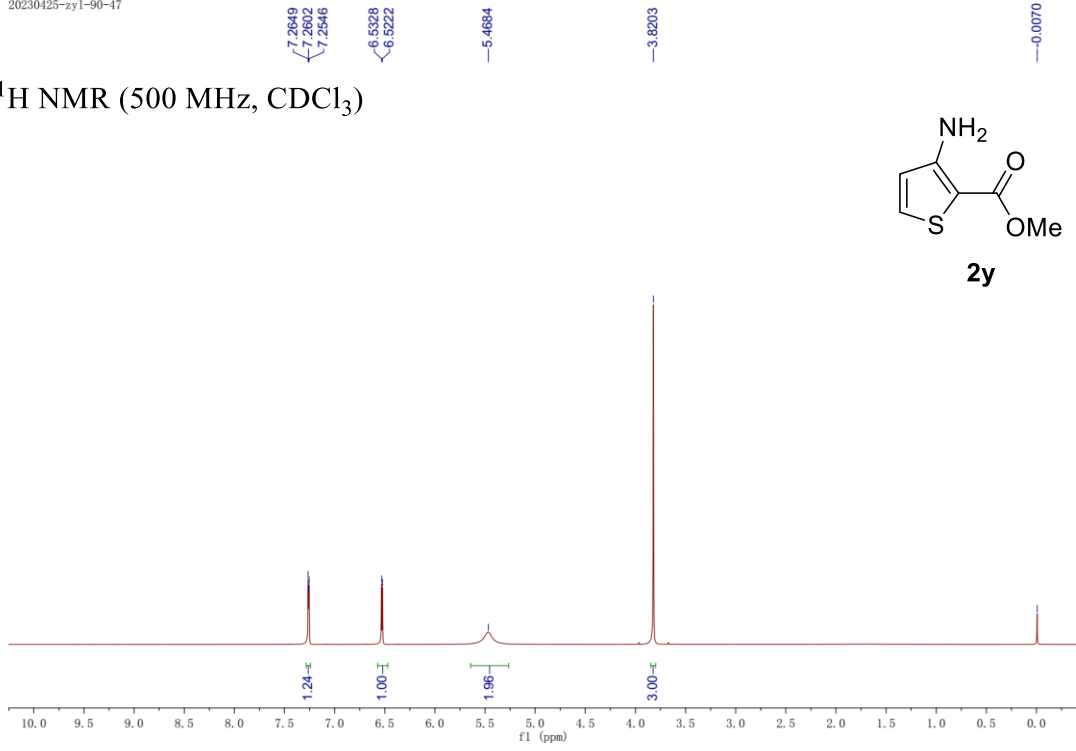

20230425-xy1-90-47

$^{13}\text{C}$  NMR (125 MHz,  $\text{CDCl}_3$ )

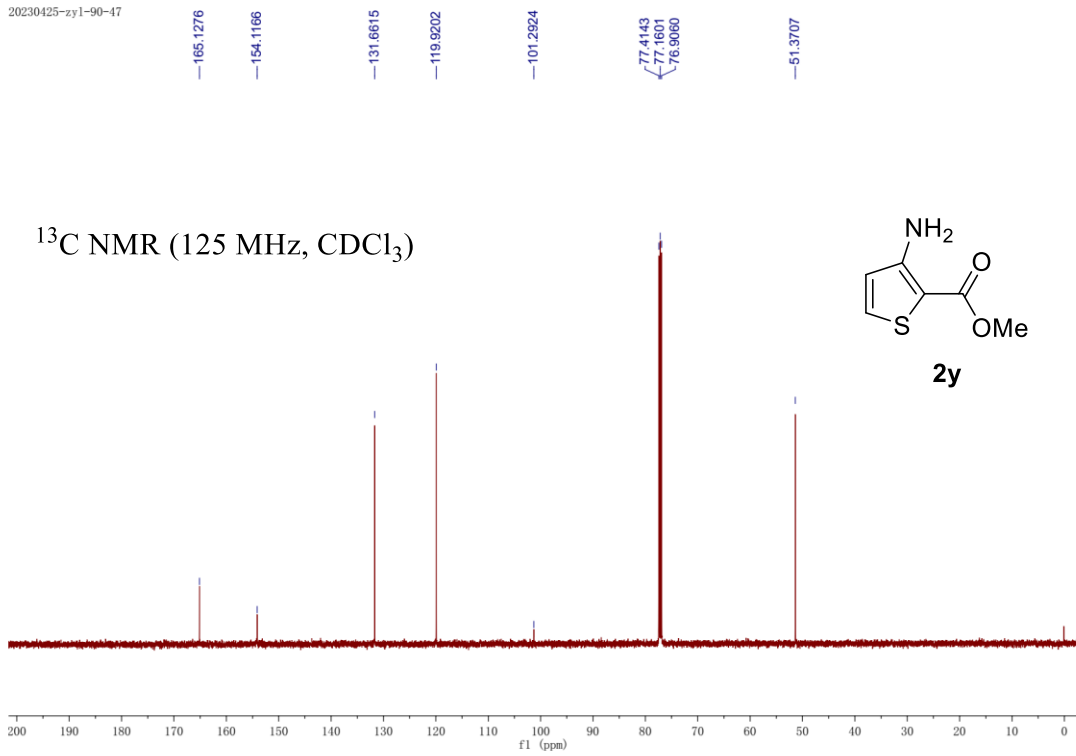

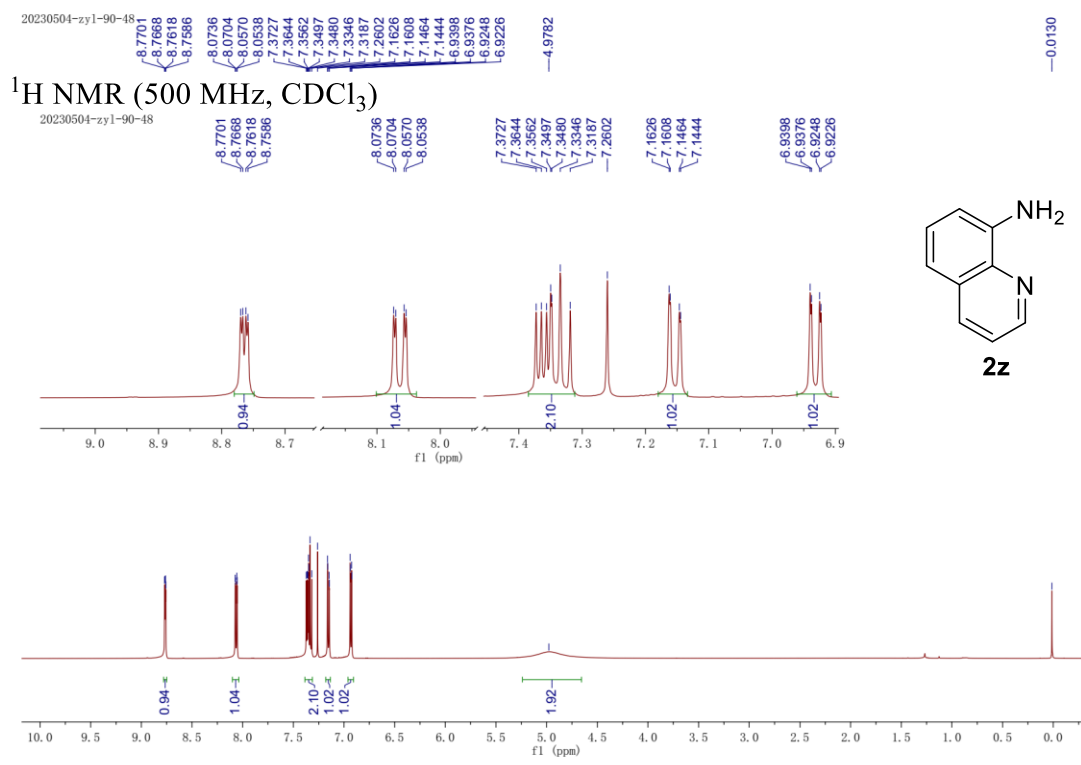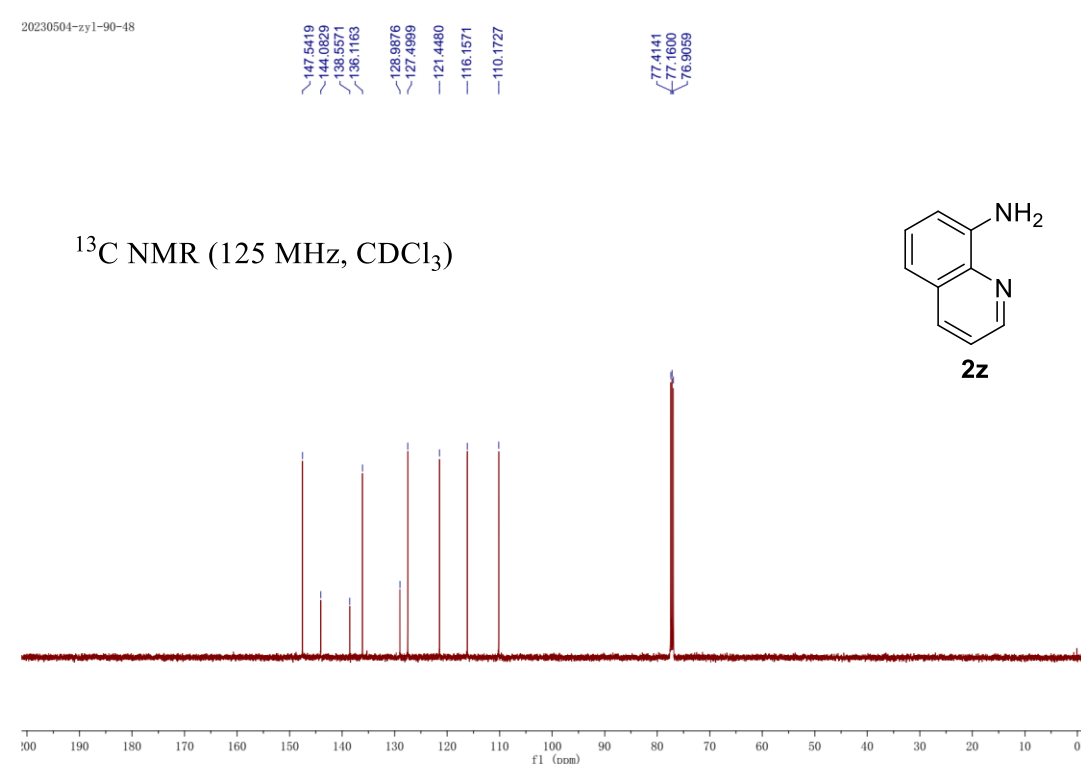



20230904-zy1-90-1637

7.7188  
7.7025  
7.3655  
7.3495  
7.2794

3.3834

2.5000  
2.3649

$^1\text{H NMR}$  (500 MHz,  $\text{DMSO-}d_6$ )

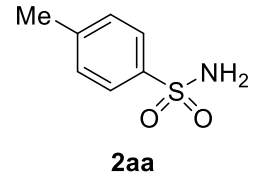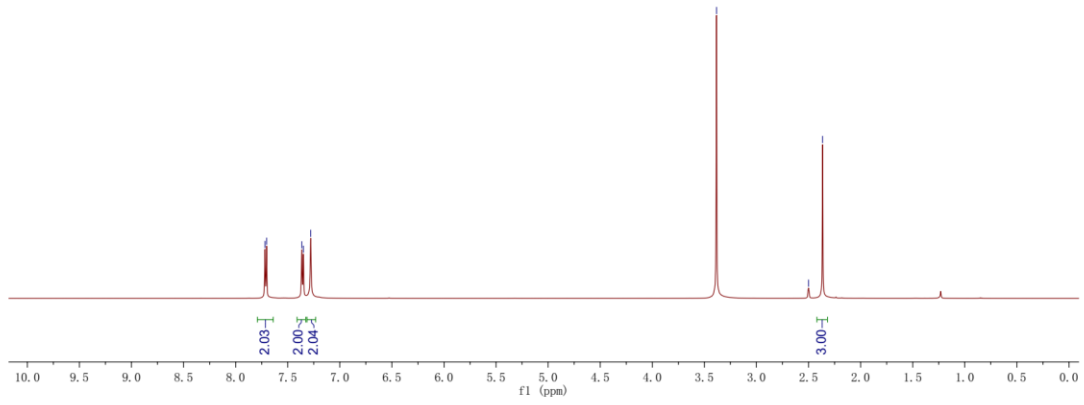

20230907-zy1-90-1637

141.8852  
141.4569

129.3186  
125.6568

40.0211  
39.8541  
39.6873  
39.5202  
39.3534  
39.1863  
39.0202

20.9376

$^{13}\text{C NMR}$  (500 MHz,  $\text{DMSO-}d_6$ )

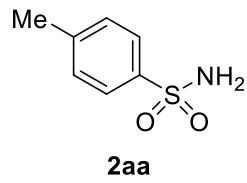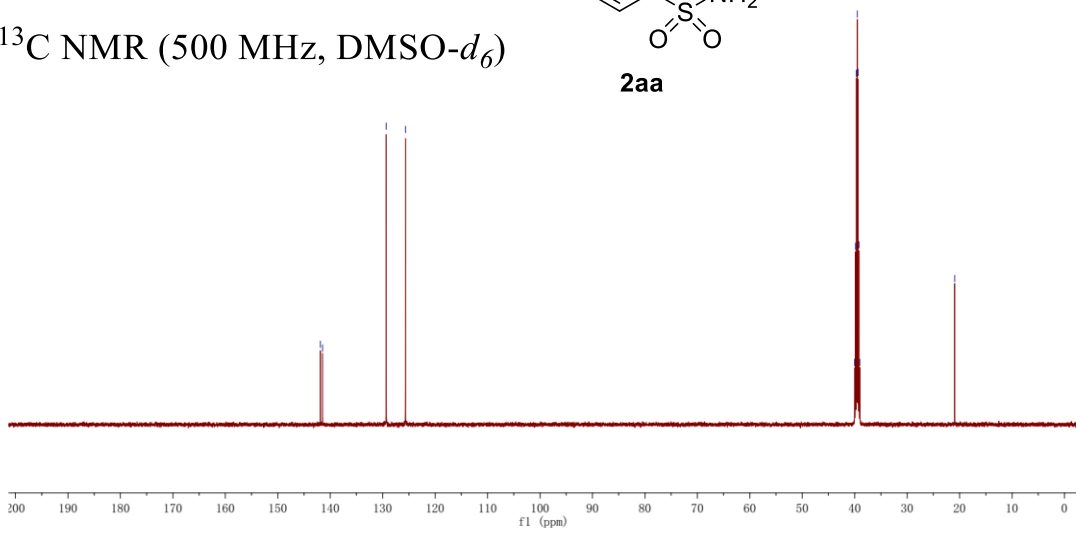

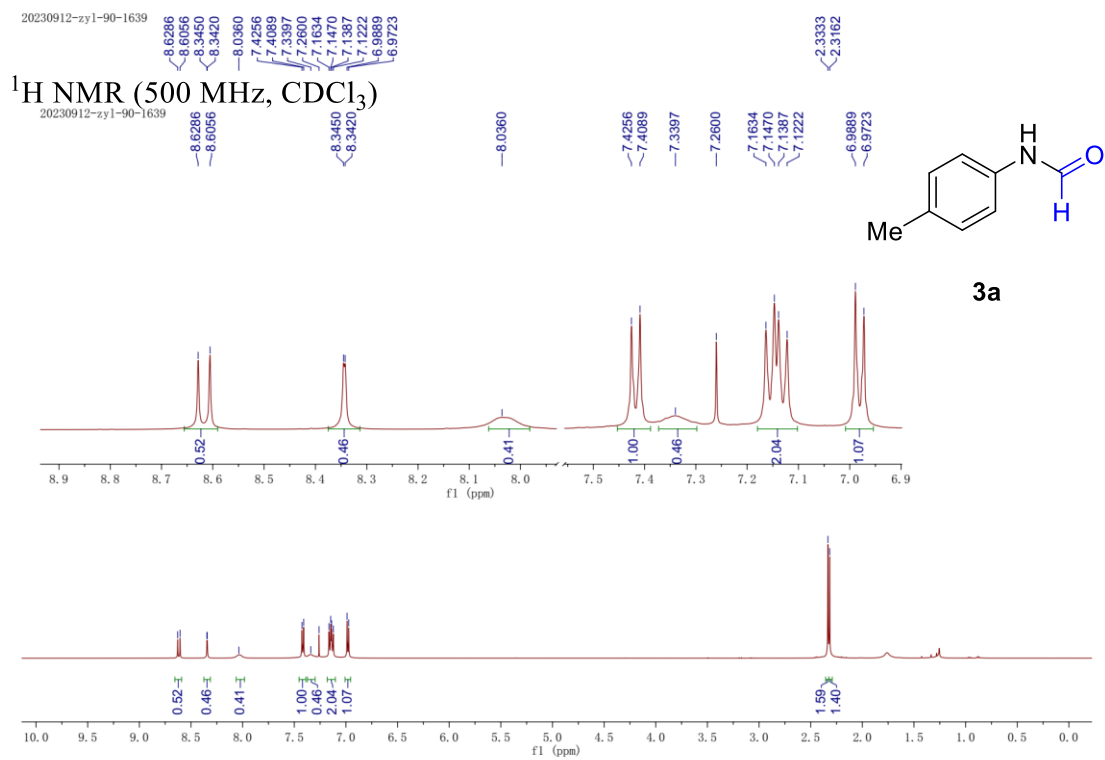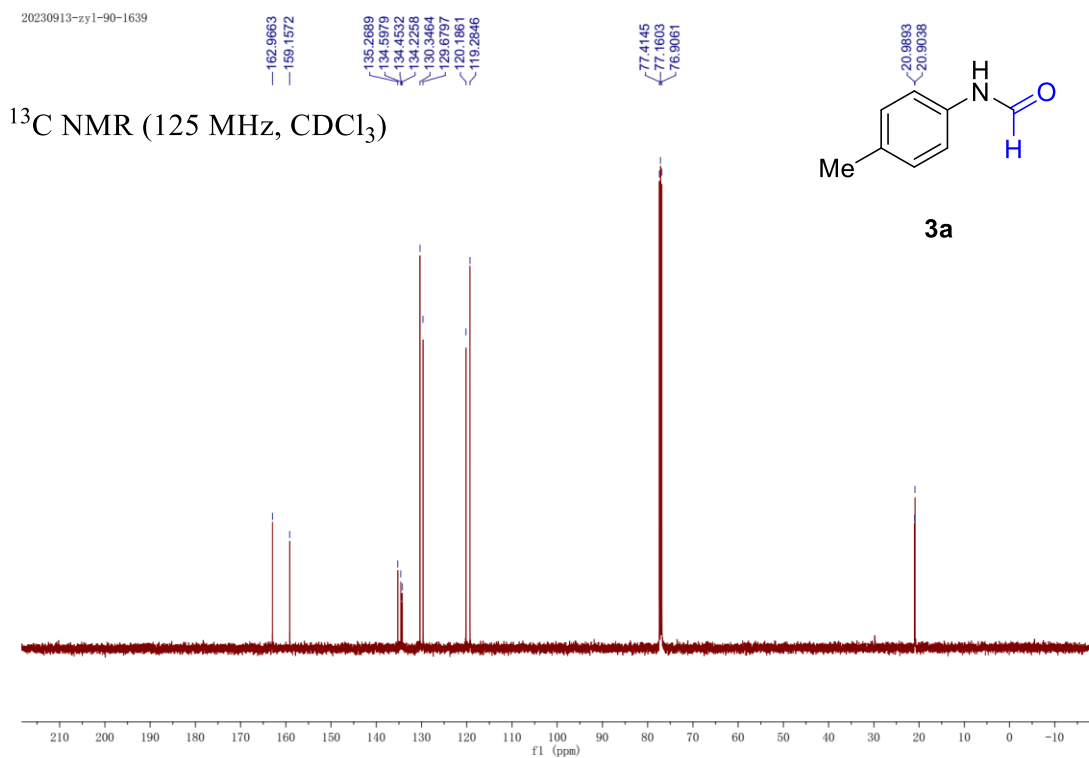

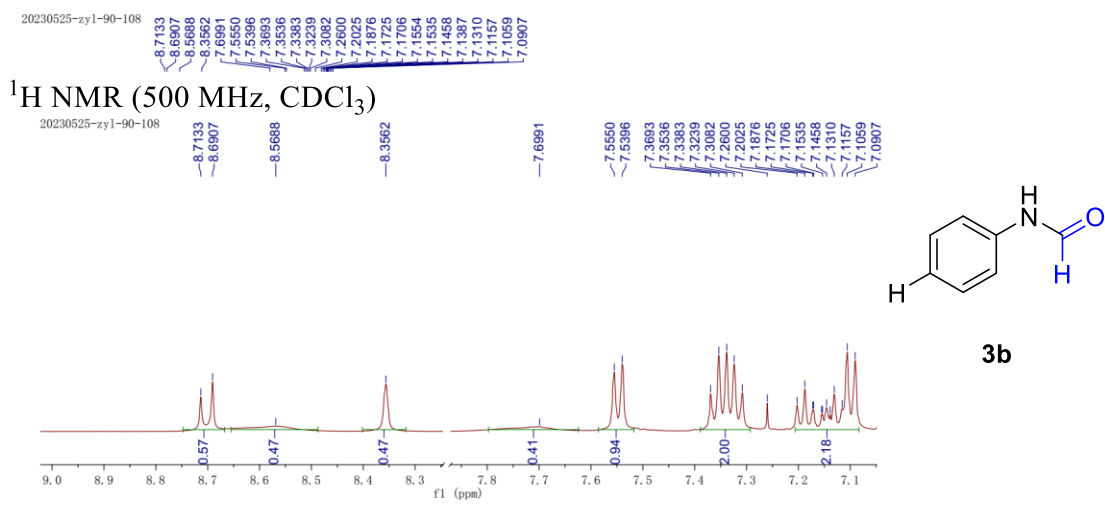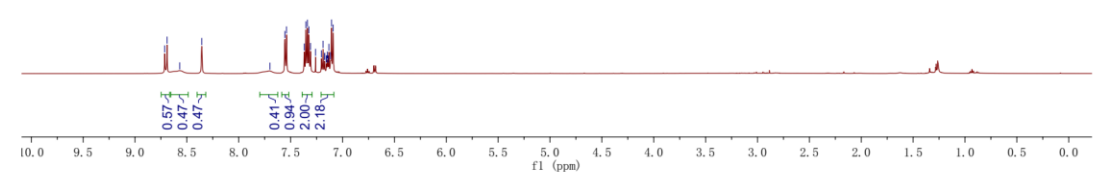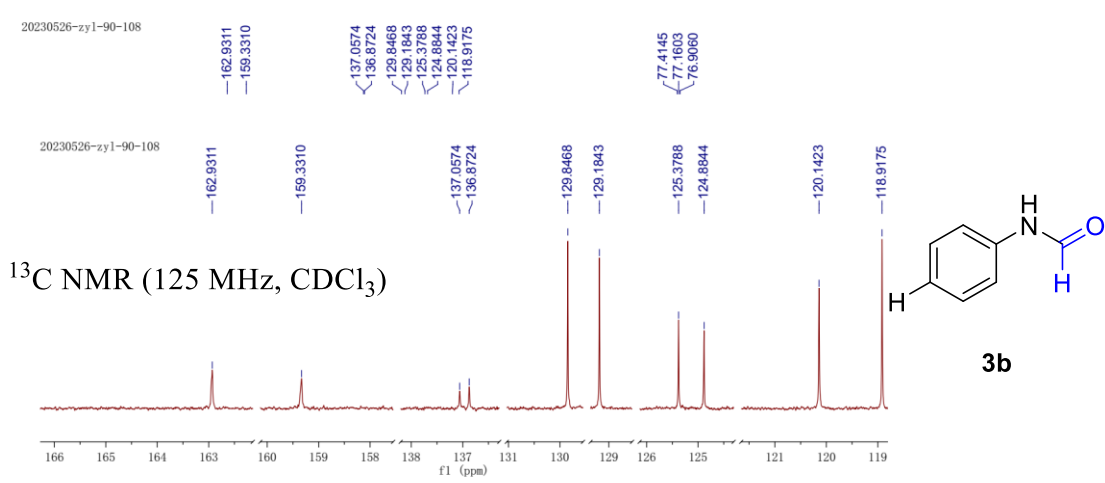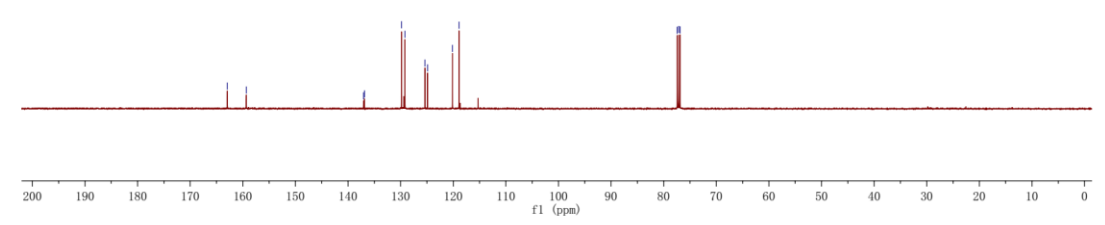

20231007-ZYL-97-8

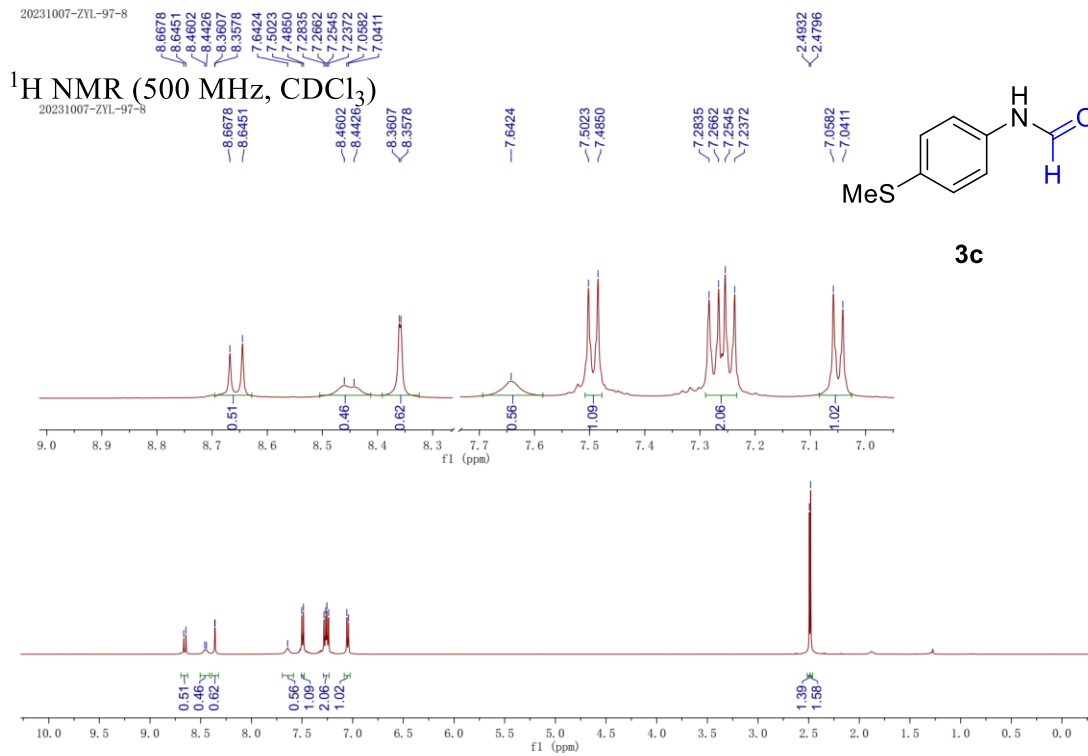

20231008-zyl-97-8

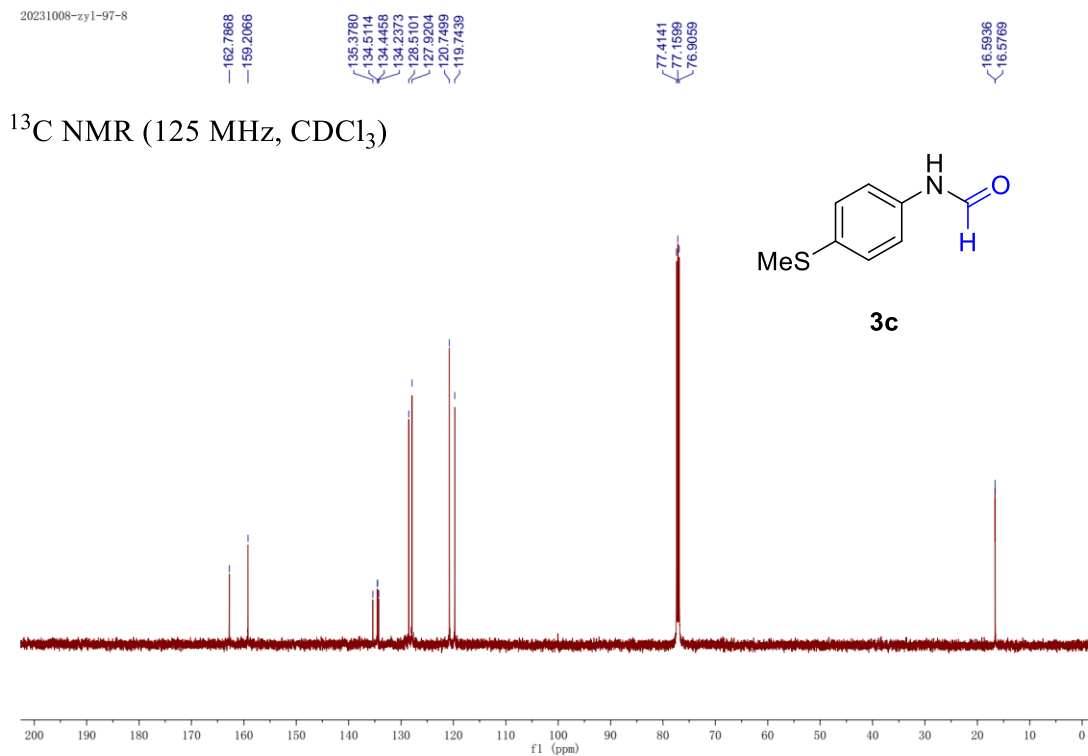

20230914-zy1-90-194

<sup>1</sup>H NMR (500 MHz, CDCl<sub>3</sub>)

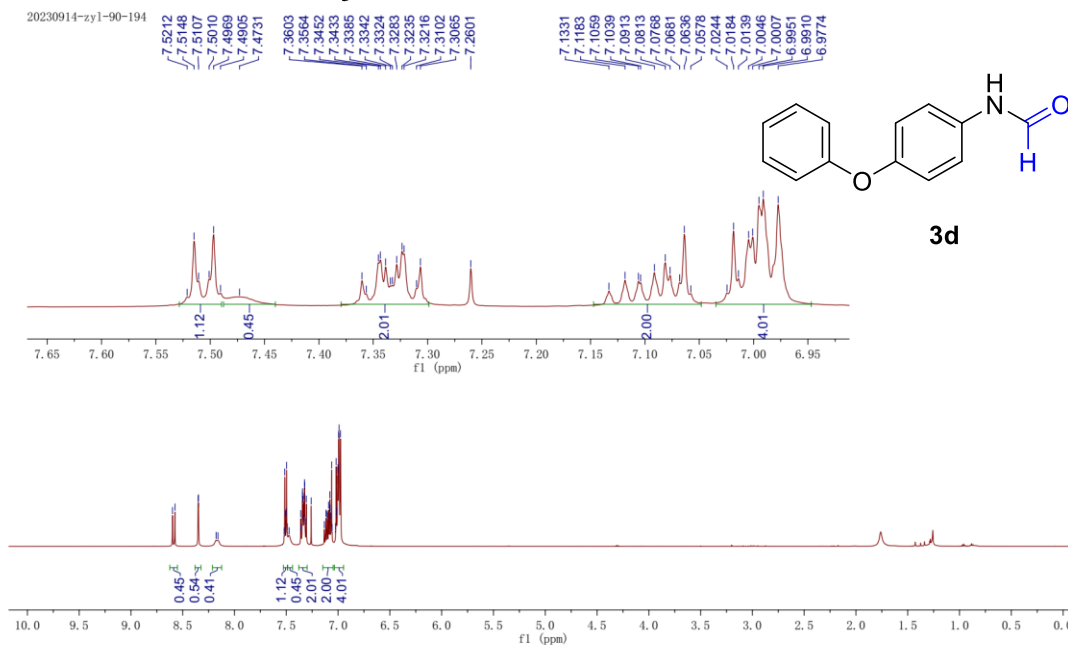

20230915-zy1-90-194

<sup>13</sup>C NMR (125 MHz, CDCl<sub>3</sub>)

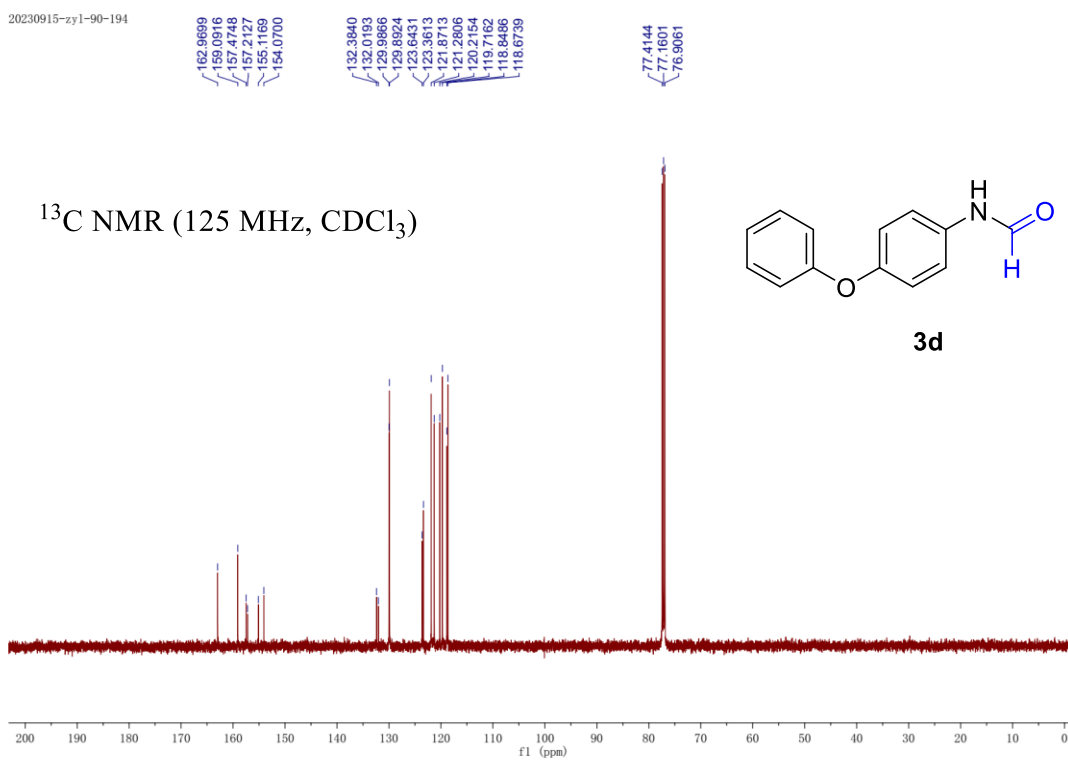



20230918-zy1-90-192

<sup>1</sup>H NMR (500 MHz, CDCl<sub>3</sub>)

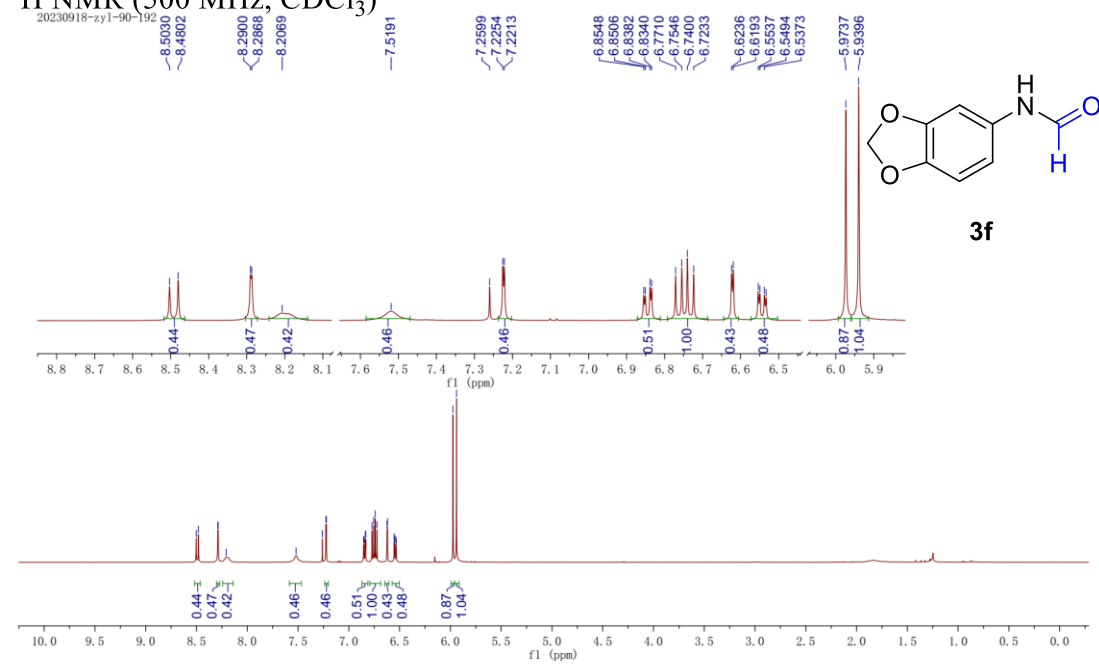

20230919-zy1-90-192

<sup>13</sup>C NMR (125 MHz, CDCl<sub>3</sub>)

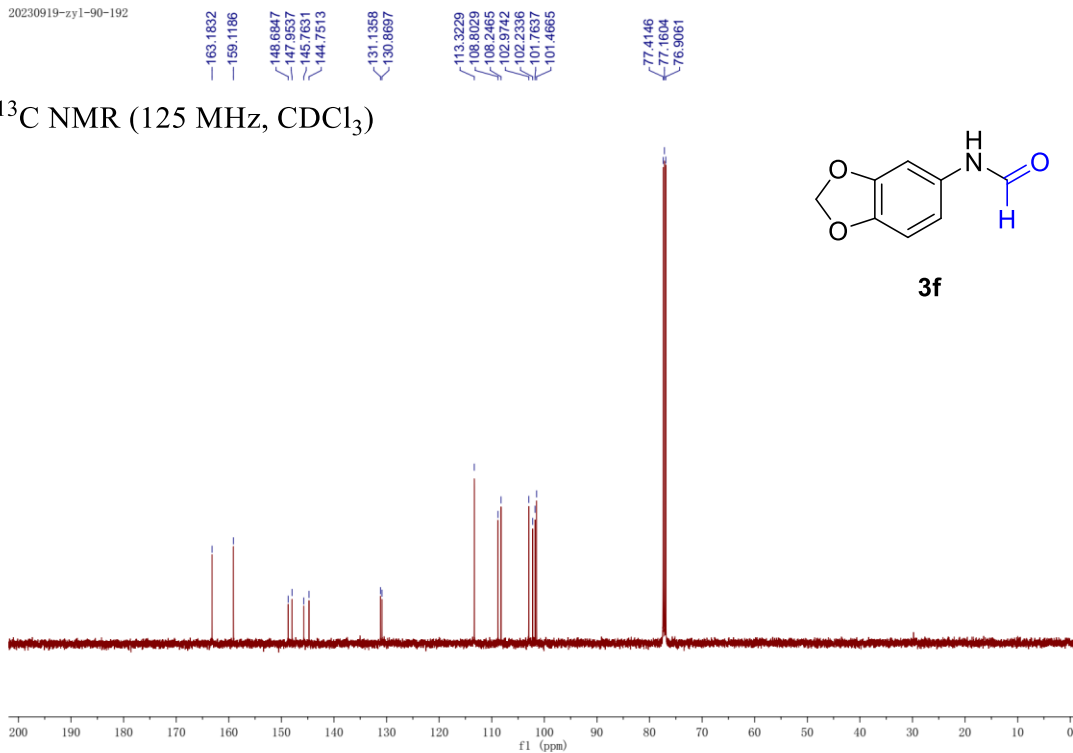

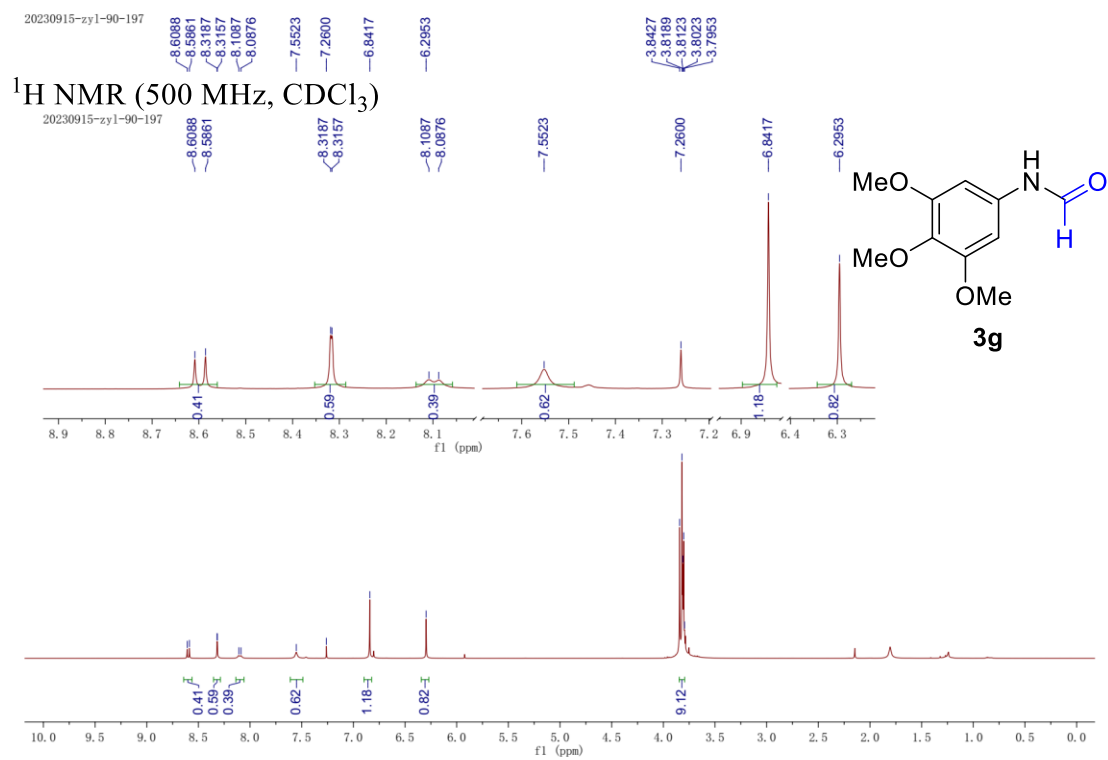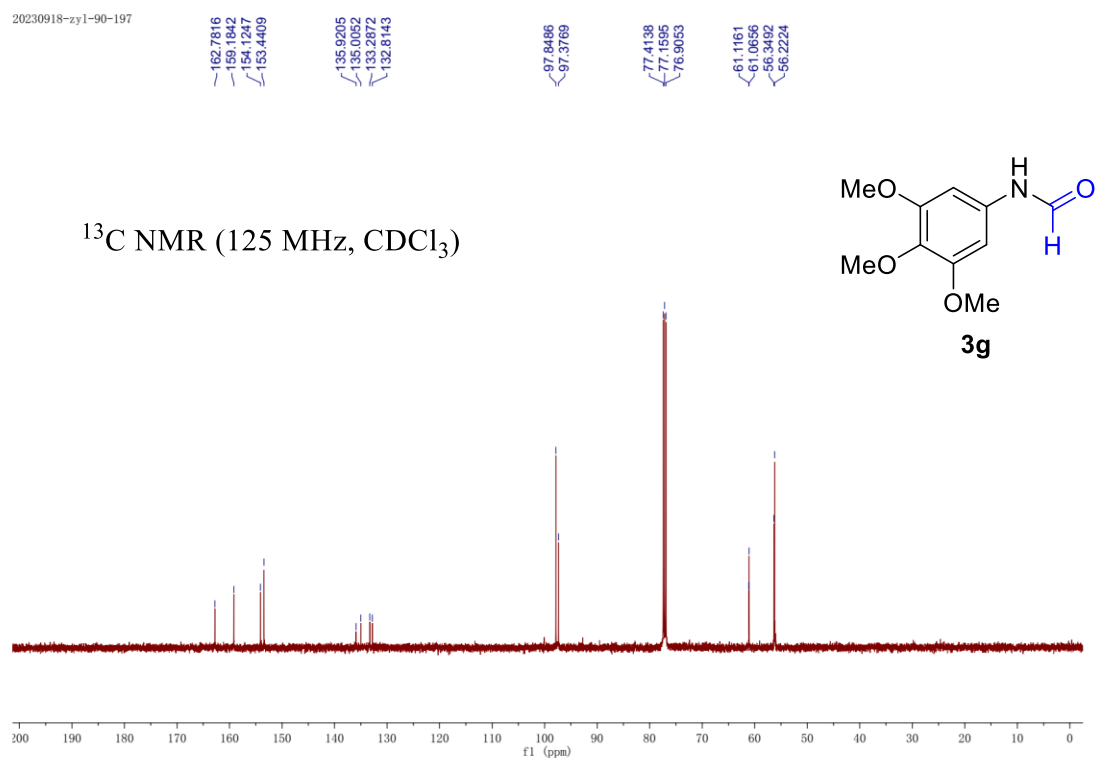



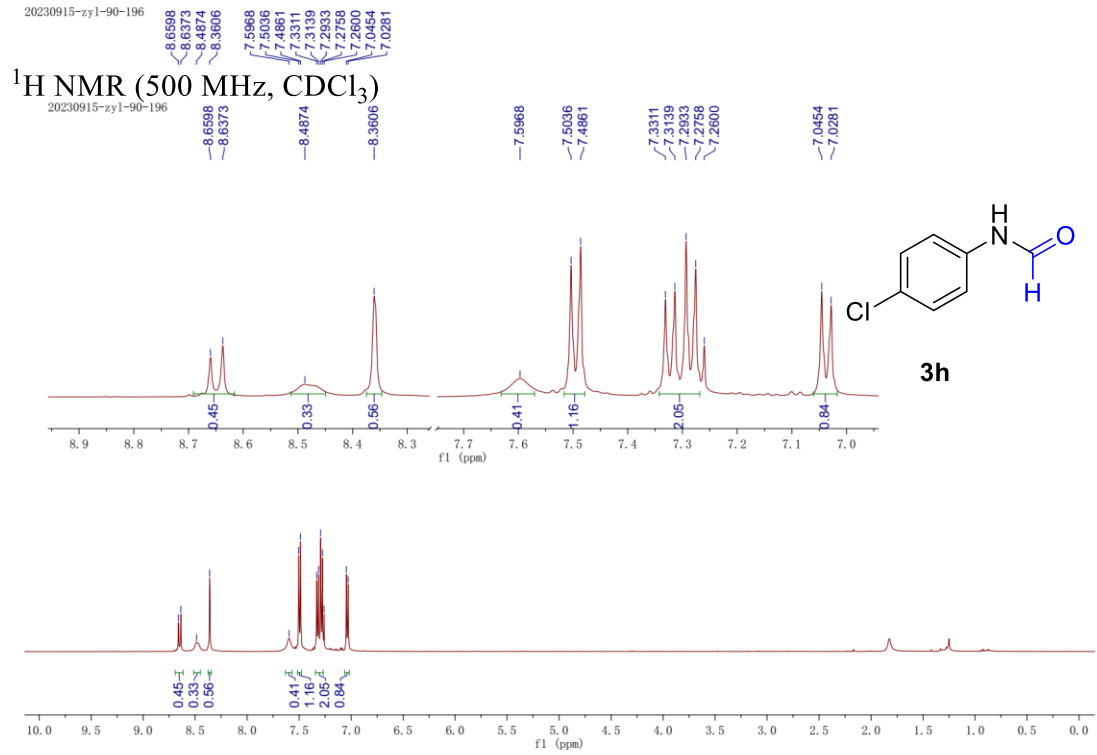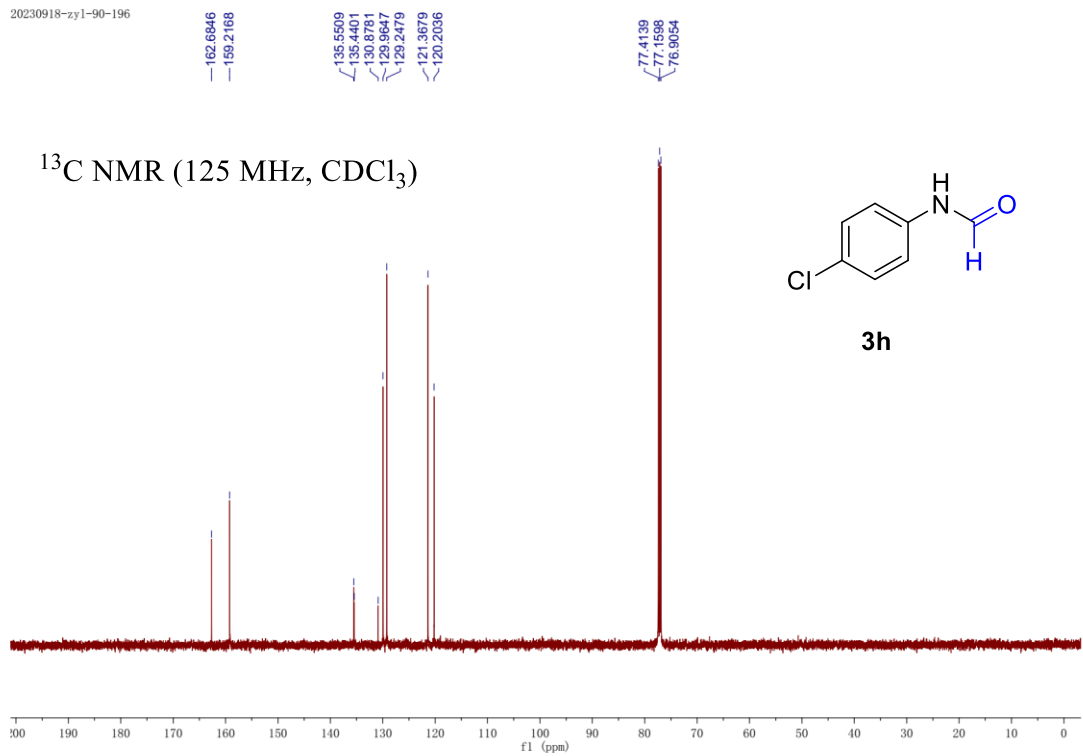

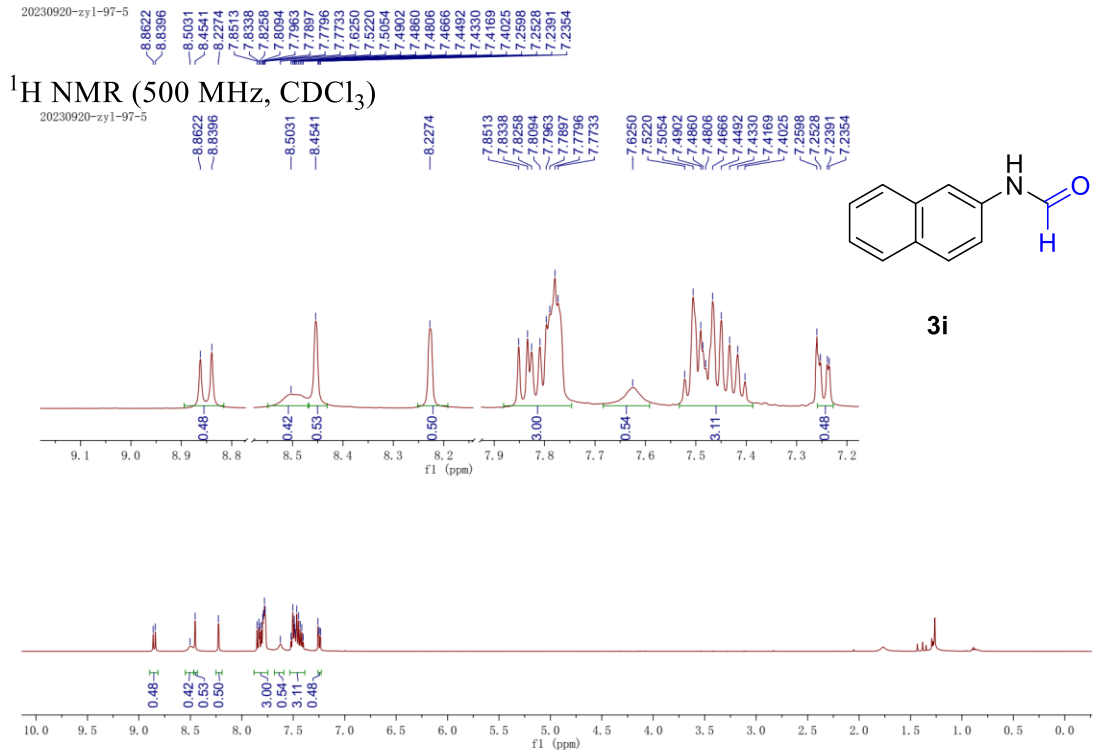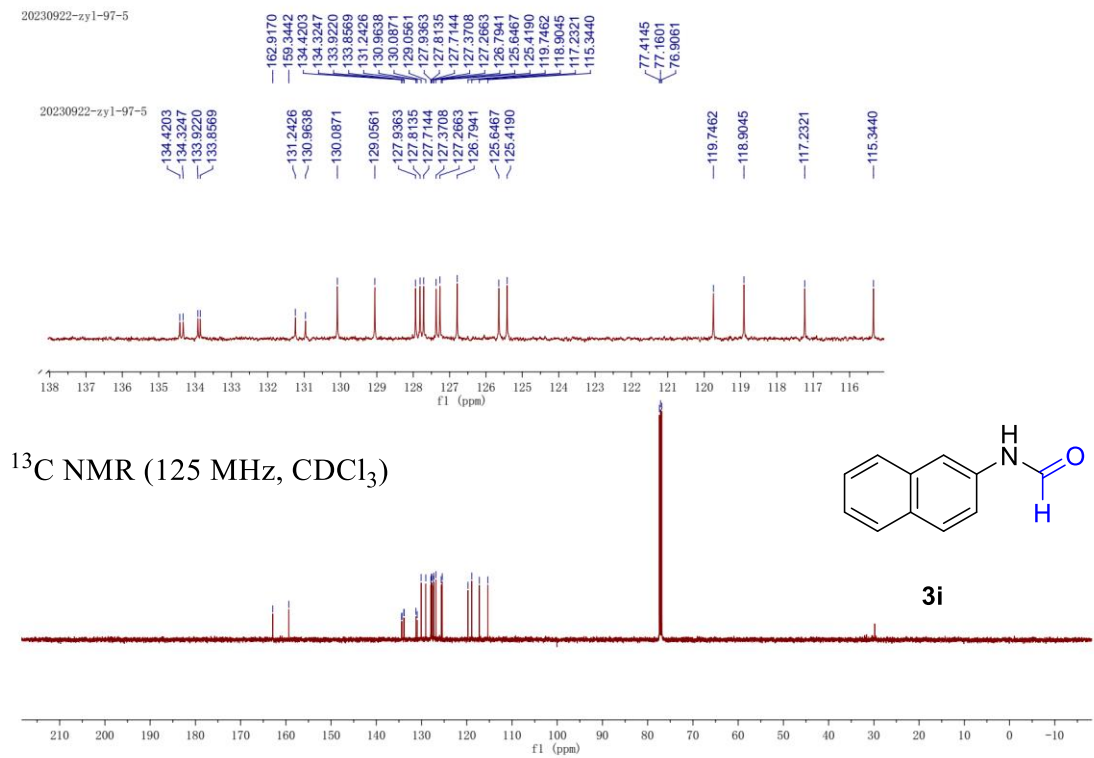

Supplement: d3qo01913f1.pdf [file d3qo01913f1.pdf]
